# Supplementary material for: Long non-coding RNA MEG3 acts as a suppressor in breast cancer by regulating miR-330/CNN1
Source: publisher site journal article supplement (doi:10.18632/aging.205419), 2024-01-17
Supplement: Supplementary file [file aging-v16i2-205419-supplementary-material-SD1.pdf]

**SUPPLEMENTARY FIGURES**

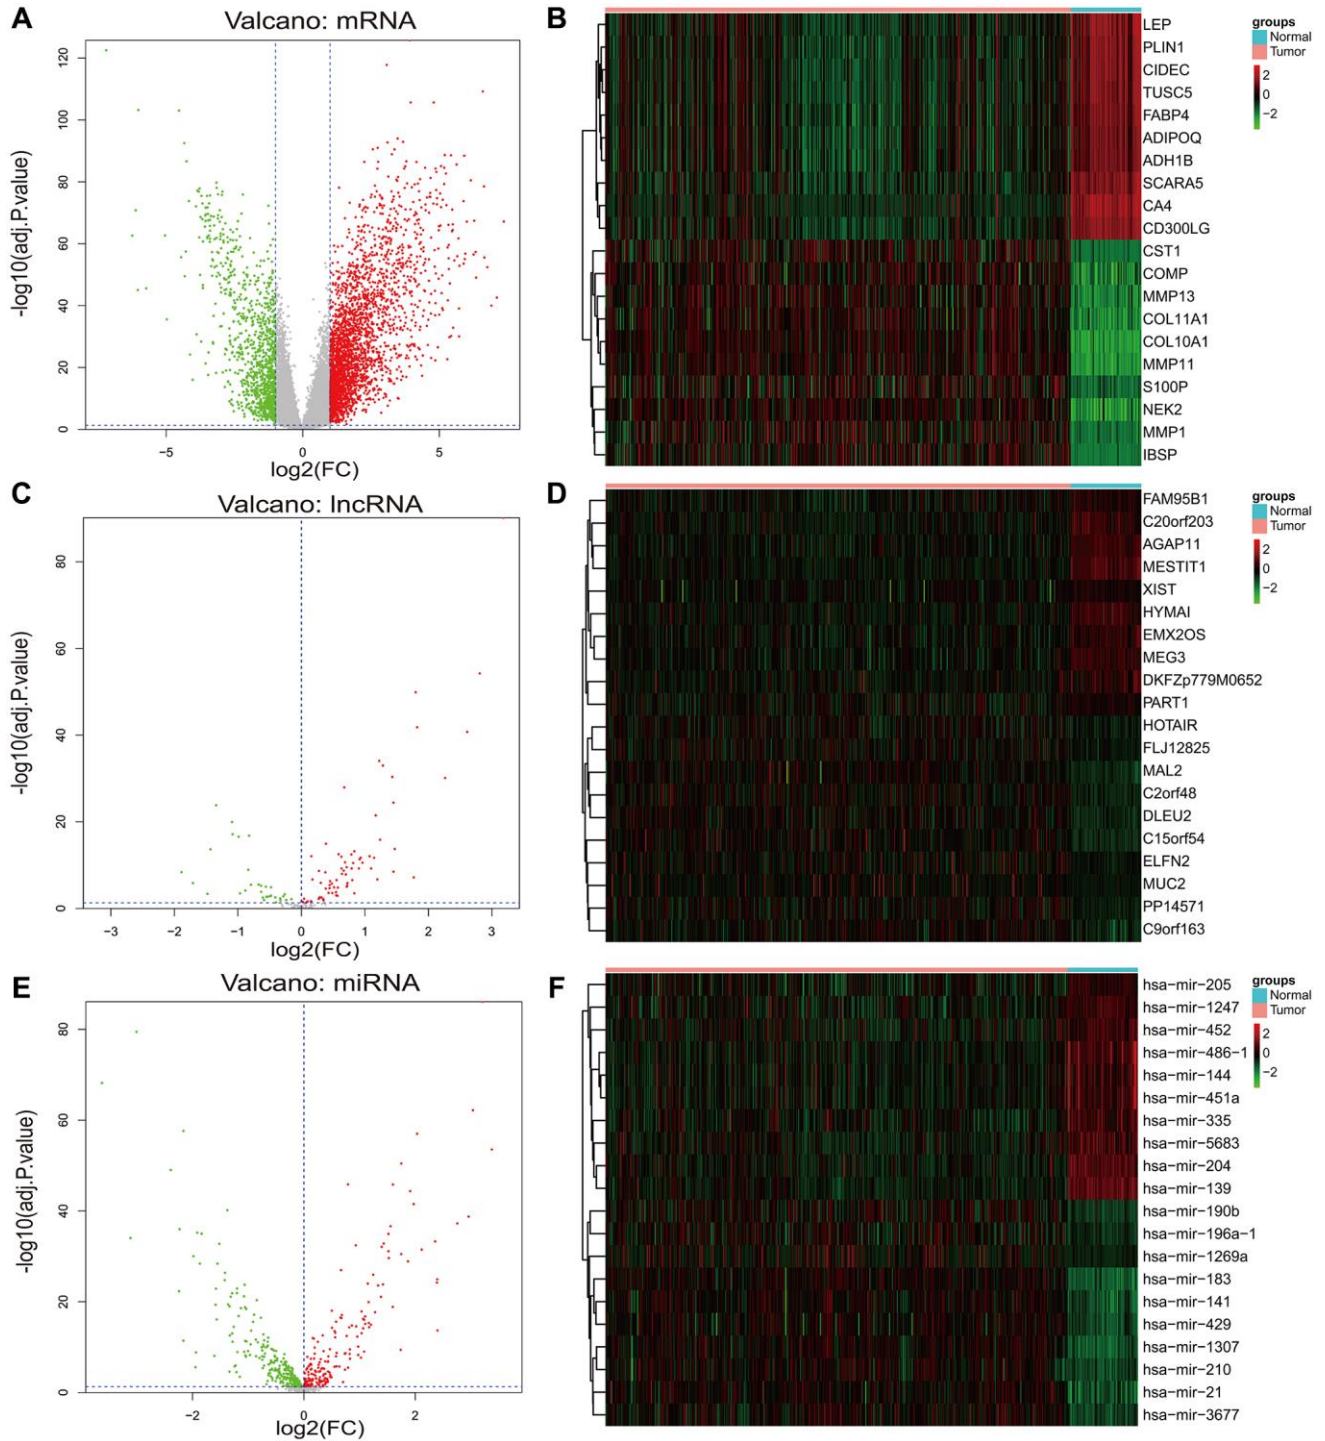

**Supplementary Figure 1. Illustration of differentially expressed mRNAs, lncRNAs and miRNAs.** (A, B) The volcano plot and heatmaps of differentially expressed mRNAs; (C, D) The volcano plot and heatmaps of differential lncRNAs; (E, F) The volcano plot and heatmaps of differential miRNAs. Red spots stand for up-regulated genes, while green spots stand for down-regulated genes.

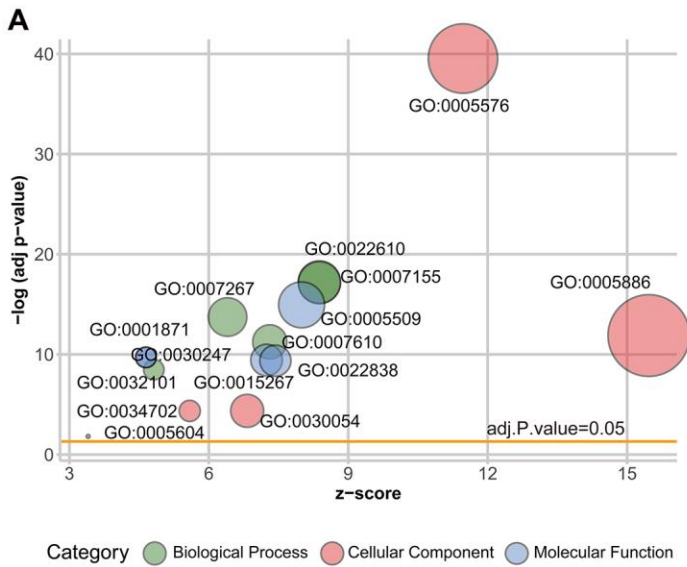

| ID         | Description                                 |
|------------|---------------------------------------------|
| GO:0007155 | cell adhesion                               |
| GO:0022610 | biological adhesion                         |
| GO:0007267 | cell-cell signaling                         |
| GO:0007610 | behavior                                    |
| GO:0032101 | regulation of response to external stimulus |
| GO:0005576 | extracellular region                        |
| GO:0005886 | plasma membrane                             |
| GO:0030054 | cell junction                               |
| GO:0034702 | ion channel complex                         |
| GO:0005604 | basement membrane                           |
| GO:0005509 | calcium ion binding                         |
| GO:0030247 | polysaccharide binding                      |
| GO:0001871 | pattern binding                             |
| GO:0015267 | channel activity                            |
| GO:0022838 | substrate specific channel activity         |

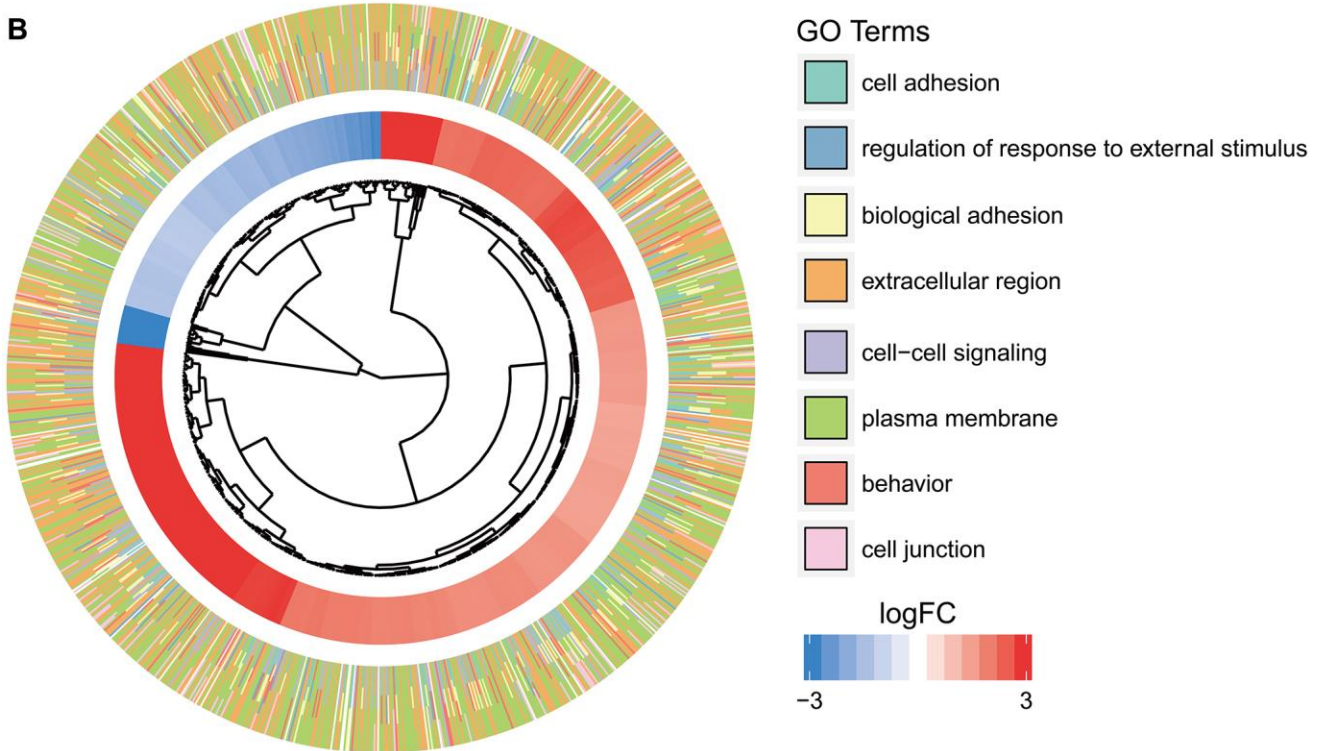

**Supplementary Figure 2. Significant GO enrichment results.** (A) The top 5 biological process (green), cellular component (red), and molecular functions (blue). (B) Significant GO terms and the corresponding enriched genes. Color bar from -3 to 3 represents  $\log_2$ FC value.

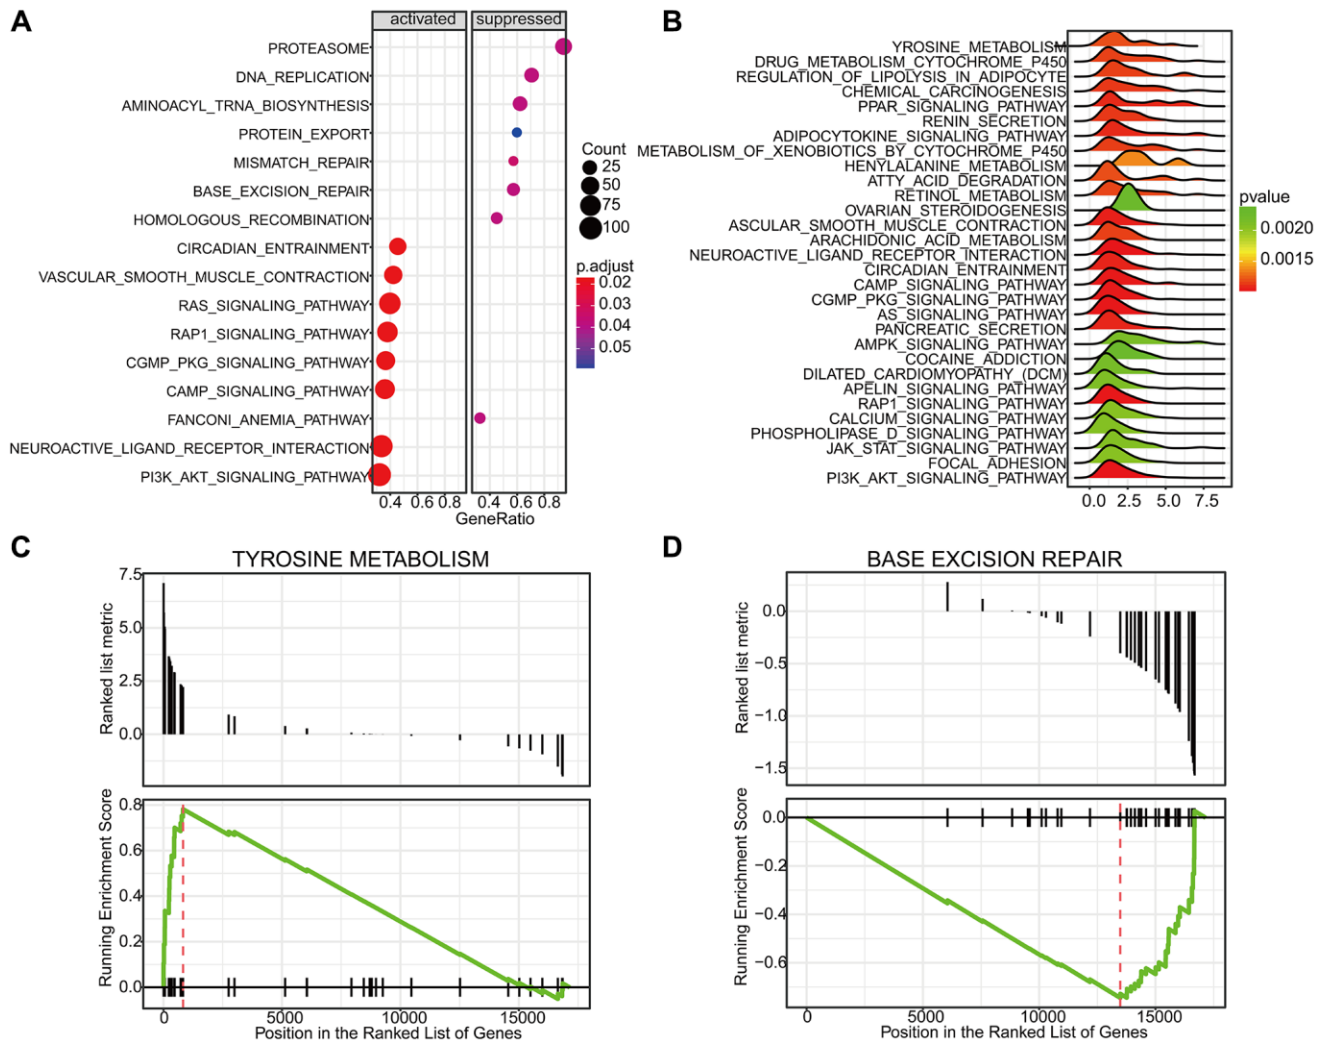

**Supplementary Figure 3. GSEA enrichment pathways.** (A) Dotplot of significant pathways. (B) Joyplot of significant pathways. (C) Up-regulated tyrosine metabolism pathway. (D) Down-regulated base excision repair pathway. Count, the number of genes enriched in a pathway; GeneRatio, the percentage of significantly enriched genes in all genes.
