# Supplementary material for: Long non-coding RNA MEG3 acts as a suppressor in breast cancer by regulating miR-330/CNN1
Source: Aging (Albany NY). 2024 Jan 17;16(2):1318–35. doi: 10.18632/aging.205419 (PMC10866439; doi:10.18632/aging.205419)
Supplement: Supplementary Table 1 [file aging-16-205419-s002.xlsx]

## Sheet: mRNA
Supplementary Table 1. The list of differentially expressed lncRNAs, miRNAs and mRNAs between breast cancer and control tissues.
genesymbol	LogFC	AveExpr	t	P.Value	adj.P.Val	B
COL10A1	7.19555	10.003	-32.1012	3.63969e-127	3.11921e-123	279.74
MMP13	6.24245	7.13602	-19.6494	3.22344e-65	2.41265e-63	137.749
COL11A1	6.11946	10.2992	-21.3333	1.17363e-73	1.60929e-71	157.096
CST1	6.03989	5.97312	-15.9394	3.84793e-47	9.67059e-46	96.3202
MMP11	6.02202	11.5723	-28.0304	2.63781e-107	6.45887e-104	234.237
MMP1	5.73499	6.428	-16.0592	1.04506e-47	2.70989e-46	97.6169
COMP	5.04653	9.59535	-19.6617	2.79812e-65	2.11277e-63	137.89
S100P	4.97955	7.31314	-13.8327	1.8615e-37	2.86667e-36	74.1456
NEK2	4.53113	8.15021	-27.9847	4.44765e-107	9.52908e-104	233.717
IBSP	4.45387	4.176	-18.1979	4.9181e-58	2.34809e-56	121.282
KIF4A	4.33681	8.27467	-25.8495	2.01552e-96	2.87884e-93	209.29
PITX1	4.3193	7.44931	-16.9012	9.96476e-52	3.2165e-50	106.829
GJB2	4.28456	8.62114	-18.582	6.33618e-60	3.39382e-58	125.614
PKMYT1	4.25594	7.38347	-24.6367	2.53747e-90	2.17461e-87	195.306
UBE2C	4.16756	8.37343	-21.9522	8.94372e-77	1.76099e-74	164.245
TNNT1	4.1282	6.28068	-11.0746	8.02387e-26	6.53967e-25	47.5503
CEACAM5	4.03391	6.36172	-8.79526	1.92851e-17	9.37456e-17	28.4561
MELK	3.90941	7.73663	-21.604	5.08915e-75	8.30744e-73	160.221
EPYC	3.88737	4.06497	-12.6953	1.7189e-32	2.0207e-31	62.7873
IQGAP3	3.85918	8.58414	-22.6761	1.9903e-80	6.2025e-78	172.62
NUF2	3.80905	7.5135	-22.5991	4.86869e-80	1.4144e-77	171.729
BIRC5	3.78909	7.70086	-19.531	1.25361e-64	8.9903e-63	136.397
KIF20A	3.77907	8.42357	-22.8055	4.41926e-81	1.42917e-78	174.119
TDO2	3.76098	5.00845	-16.9897	3.73292e-52	1.23757e-50	107.806
ASPM	3.74392	8.59203	-20.8846	2.11715e-71	2.47899e-69	151.923
GRM4	3.71695	4.89635	-12.1324	4.07273e-30	4.20269e-29	57.359
CDC25C	3.71113	5.93586	-22.3029	1.52295e-78	3.67652e-76	168.301
TOP2A	3.67571	10.8689	-20.746	1.05108e-70	1.18523e-68	150.328
DLGAP5	3.67166	7.71447	-21.7945	5.58027e-76	1.02845e-73	162.422
LRRC15	3.66019	10.5015	-16.2855	8.80803e-49	2.40015e-47	100.078
MYBL2	3.65704	8.81593	-16.0836	8.00529e-48	2.08572e-46	97.8821
KIF14	3.65517	7.08818	-19.2567	2.8993e-63	1.8612e-61	133.269
TROAP	3.58252	7.00019	-20.2459	3.38062e-68	3.08212e-66	144.579
WISP1	3.57209	7.48255	-20.9957	5.85916e-72	7.12241e-70	153.202
RRM2	3.5591	9.34014	-20.6258	4.21816e-70	4.46291e-68	148.944
NKAIN1	3.55748	7.67317	-10.3079	7.33788e-23	5.03689e-22	40.7949
HJURP	3.5558	7.44239	-21.5123	1.47387e-74	2.24334e-72	159.162
PBK	3.55234	7.36191	-21.0539	2.98475e-72	3.7342e-70	153.874
TPX2	3.50751	9.86026	-22.3045	1.49416e-78	3.65856e-76	168.32
EXO1	3.49713	7.26428	-19.4834	2.16295e-64	1.51318e-62	135.854
KIF18B	3.49394	6.78734	-19.5741	7.64407e-65	5.57529e-63	136.889
BUB1	3.48411	8.3211	-21.5245	1.2786e-74	1.97435e-72	159.304
CEP55	3.47441	8.10618	-21.097	1.81263e-72	2.28445e-70	154.371
CNTNAP2	3.46502	7.43571	-9.26567	4.61196e-19	2.48973e-18	32.1431
PLK1	3.46239	8.30632	-20.6599	2.84278e-70	3.06448e-68	149.337
CST4	3.4506	3.21448	-11.245	1.69102e-26	1.42218e-25	49.094
FOXM1	3.43683	9.18084	-19.6496	3.21544e-65	2.41265e-63	137.751
UHRF1	3.42955	7.94112	-21.8055	4.90915e-76	9.14596e-74	162.55
ADAMTS14	3.40369	6.04886	-19.229	3.97703e-63	2.54352e-61	132.955
ANLN	3.39813	9.14291	-20.3039	1.73106e-68	1.62133e-66	145.246
NEIL3	3.39743	5.29454	-19.4414	3.49903e-64	2.37049e-62	135.375
HMMR	3.39576	7.64701	-22.3336	1.0652e-78	2.64602e-76	168.657
NDC80	3.39463	7.51415	-20.6904	1.99976e-70	2.18318e-68	149.687
KIF2C	3.39411	8.24921	-19.9755	7.60159e-67	6.23403e-65	141.48
CKAP2L	3.36294	6.89597	-20.9588	8.97124e-72	1.07529e-69	152.778
E2F8	3.35481	6.15625	-17.5903	4.59265e-55	1.81797e-53	114.474
CDC20	3.32139	8.50792	-18.5449	9.64938e-60	5.05781e-58	125.195
CCL11	3.32029	3.75467	-16.9322	7.06819e-52	2.3076e-50	107.17
CDC45	3.30863	6.69607	-18.0552	2.46514e-57	1.12373e-55	119.677
CST2	3.29172	3.70468	-12.0803	6.70313e-30	6.83066e-29	56.8645
FAM83D	3.28829	7.73405	-17.9773	5.93139e-57	2.66835e-55	118.804
HAPLN1	3.28172	4.27406	-11.9602	2.10932e-29	2.10196e-28	55.7269
SLC24A2	3.26634	3.2705	-14.0924	1.28157e-38	2.09601e-37	76.8052
GABRD	3.26089	5.09416	-20.9208	1.39259e-71	1.65757e-69	152.34
CCNB2	3.24309	8.144	-20.3254	1.35203e-68	1.28032e-66	145.492
AURKB	3.23342	6.76748	-17.5193	1.01768e-54	3.91979e-53	113.682
MKI67	3.22961	10.3896	-19.4164	4.65845e-64	3.14354e-62	135.09
PLAC1	3.19794	3.3528	-14.9756	1.21623e-42	2.4525e-41	86.0144
MS4A15	3.17316	3.36567	-9.45305	1.00335e-19	5.64222e-19	33.6507
INHBA	3.16268	7.95228	-19.4987	1.8149e-64	1.27489e-62	136.028
SPC25	3.16248	6.50069	-23.1995	4.53328e-83	1.85001e-80	178.679
DEPDC1	3.15797	7.40983	-17.6091	3.72373e-55	1.49123e-53	114.683
HAGHL	3.15543	6.09092	-16.8802	1.25674e-51	4.03381e-50	106.598
NUSAP1	3.15411	9.24357	-22.8479	2.70101e-81	9.0775e-79	174.609
FN1	3.12231	15.985	-18.5445	9.69984e-60	5.06876e-58	125.19
BUB1B	3.1098	8.13004	-20.7919	6.18269e-71	7.06475e-69	150.856
UBE2T	3.09942	8.13375	-22.4162	4.07944e-79	1.09252e-76	169.613
CENPF	3.09858	10.6084	-21.0081	5.07618e-72	6.25941e-70	153.345
CENPA	3.09653	6.32626	-17.1334	7.56216e-53	2.61849e-51	109.395
SKA1	3.08403	6.59801	-18.4862	1.87879e-59	9.67039e-58	124.532
CNIH2	3.0431	5.35575	-16.379	3.16021e-49	8.85065e-48	101.098
CDK1	3.04254	9.23378	-20.573	7.7598e-70	7.96425e-68	148.337
WDR62	3.03621	7.07785	-21.3436	1.0419e-73	1.46378e-71	157.215
CLSPN	3.03491	6.48687	-16.9876	3.81945e-52	1.26381e-50	107.783
SKA3	3.02321	7.00957	-19.4012	5.54708e-64	3.69949e-62	134.916
HIST1H3D	3.02179	4.45807	-13.314	3.63464e-35	4.97586e-34	68.9047
NCAPG	3.00875	8.27659	-19.6029	5.49346e-65	4.05853e-63	137.218
PTTG1	3.00659	7.92752	-19.7887	6.51368e-66	5.05179e-64	139.341
DEPDC1B	2.99923	6.27217	-17.7996	4.38577e-56	1.86531e-54	116.812
PPEF1	2.98841	5.04049	-16.1141	5.73942e-48	1.51111e-46	98.2132
MCM10	2.98826	7.19206	-15.779	2.19435e-46	5.32736e-45	94.5882
GTSE1	2.98734	7.11694	-18.7987	5.39071e-61	3.0294e-59	128.067
HIST1H3H	2.96945	3.93775	-13.3195	3.43805e-35	4.72181e-34	68.9599
DTL	2.96774	8.64224	-20.8851	2.10503e-71	2.47899e-69	151.929
HSD17B6	2.95883	6.12482	-22.3754	6.55251e-79	1.67627e-76	169.141
ASF1B	2.94111	8.4603	-22.5948	5.1219e-80	1.46316e-77	171.679
WT1	2.93026	3.78171	-9.49643	7.02763e-20	3.99514e-19	34.0027
CDKN3	2.92777	6.81626	-20.0782	2.33335e-67	1.99968e-65	142.656
RAD54L	2.92519	6.64384	-17.5951	4.35345e-55	1.73128e-53	114.528
AURKA	2.90789	8.33017	-19.7262	1.33403e-65	1.02535e-63	138.627
ESM1	2.90487	7.05343	-19.3172	1.45003e-63	9.41423e-62	133.959
KIFC1	2.90133	8.5445	-19.1873	6.40832e-63	4.00871e-61	132.48
TUBB3	2.89512	8.75574	-14.2569	2.32598e-39	3.97085e-38	78.5015
FAM64A	2.87869	6.10647	-16.7632	4.58897e-51	1.40959e-49	105.309
CLEC5A	2.86574	6.34292	-15.9446	3.63747e-47	9.1551e-46	96.3761
P4HA3	2.86336	6.81514	-16.6929	9.97513e-51	3.00481e-49	104.536
TMPRSS4	2.85411	4.01755	-8.05994	4.95538e-15	2.06303e-14	22.9852
CXCL11	2.84803	6.7006	-11.106	6.02771e-26	4.95753e-25	47.8339
TK1	2.83459	9.39531	-20.4697	2.55821e-69	2.56419e-67	147.149
CILP2	2.83051	7.16974	-15.6842	6.12303e-46	1.45157e-44	93.5675
KREMEN2	2.82943	4.24685	-11.5474	1.03035e-27	9.25587e-27	51.8688
KIF15	2.82223	7.30217	-17.8079	3.99119e-56	1.70596e-54	116.906
ADAMDEC1	2.8102	5.87616	-9.67667	1.58105e-20	9.351e-20	35.4778
MND1	2.79893	5.33071	-15.9981	2.03145e-47	5.21244e-46	96.9556
SPC24	2.79818	3.68631	-16.6682	1.31033e-50	3.93329e-49	104.265
CXCL10	2.78602	8.54759	-11.4651	2.21622e-27	1.95905e-26	51.1092
CDCA5	2.77586	8.35481	-18.1739	6.44828e-58	3.05314e-56	121.012
CDCA8	2.75659	8.22314	-19.5399	1.13164e-64	8.14974e-63	136.498
ESCO2	2.74525	6.60824	-18.4739	2.16004e-59	1.10848e-57	124.393
CENPM	2.74281	6.5135	-19.2104	4.92147e-63	3.11719e-61	132.743
NCAPH	2.74027	7.73301	-18.0803	1.85543e-57	8.64188e-56	119.96
HOXC11	2.73244	5.26465	-8.63474	6.67586e-17	3.14007e-16	27.2308
MMP10	2.73146	4.68324	-8.58377	9.86784e-17	4.58982e-16	26.8453
TTK	2.72892	7.60437	-16.4438	1.55049e-49	4.44405e-48	101.806
CDCA3	2.72406	7.14786	-17.3438	7.24577e-54	2.65368e-52	111.729
ESPL1	2.71417	7.71201	-16.8125	2.66084e-51	8.30724e-50	105.851
CDCA2	2.68941	6.75375	-15.5927	1.64438e-45	3.78317e-44	92.5848
FAM111B	2.68771	8.35283	-16.4929	9.04416e-50	2.62741e-48	102.343
ACAN	2.68486	5.58864	-13.1496	1.89502e-34	2.50429e-33	67.2642
HOXB13	2.6821	2.94188	-6.43172	2.78639e-10	8.38018e-10	12.251
MMP9	2.68091	9.45627	-10.6315	4.28713e-24	3.15506e-23	43.6077
CCNA2	2.67938	8.32451	-16.9082	9.21498e-52	2.98572e-50	106.907
AIM1L	2.67373	3.5404	-12.5883	4.90623e-32	5.60245e-31	61.7458
HCN2	2.66634	3.53426	-12.1219	4.50318e-30	4.63849e-29	57.2593
TMEM145	2.66318	3.80728	-9.71492	1.1492e-20	6.85364e-20	35.7933
FAM72A	2.66274	4.61507	-15.7672	2.49419e-46	6.0382e-45	94.4608
TFR2	2.66069	4.62522	-12.2158	1.82681e-30	1.92924e-29	58.1548
MYT1	2.6602	3.46398	-8.32938	6.76338e-16	2.97547e-15	24.9473
CENPE	2.65229	8.17946	-17.7051	1.26802e-55	5.24973e-54	115.755
ERCC6L	2.64985	6.70534	-19.3703	7.8955e-64	5.18501e-62	134.564
OIP5	2.64693	5.83794	-20.0484	3.28788e-67	2.77607e-65	142.314
SDS	2.64571	7.06078	-17.1459	6.57452e-53	2.30444e-51	109.534
ISG15	2.64176	9.47693	-11.9189	3.12389e-29	3.08608e-28	55.3372
SHCBP1	2.64141	7.34907	-17.5929	4.46463e-55	1.77138e-53	114.503
CDC6	2.64094	8.33762	-15.5391	2.93221e-45	6.69216e-44	92.0094
E2F7	2.63767	6.07273	-15.9924	2.16223e-47	5.53143e-46	96.8936
KIF26B	2.63314	7.68865	-15.678	6.54819e-46	1.55022e-44	93.5007
SYT13	2.62862	7.4046	-6.11621	1.84301e-09	5.18792e-09	10.4072
GPRIN1	2.62707	7.04071	-18.5644	7.7362e-60	4.11796e-58	125.415
CCNE2	2.61749	7.62932	-16.9603	5.17148e-52	1.69807e-50	107.481
SPAG5	2.61523	9.0081	-17.9259	1.05783e-56	4.66099e-55	118.228
CA9	2.60737	3.13208	-6.62454	8.45511e-11	2.64164e-10	13.4169
IGFL2	2.58886	3.30433	-11.2038	2.46748e-26	2.05803e-25	48.7194
FBN2	2.57355	6.49816	-11.2779	1.25046e-26	1.05998e-25	49.3933
TRPA1	2.57257	3.67698	-7.56018	1.74488e-13	6.55571e-13	19.4812
CEACAM6	2.56524	8.73586	-5.89794	6.50468e-09	1.75354e-08	9.17885
CTHRC1	2.5635	10.3689	-17.2233	2.77631e-53	9.91373e-52	110.392
HIST1H4H	2.56133	7.37484	-11.7306	1.85302e-28	1.74031e-27	53.5707
KIAA1211	2.56054	6.91462	-14.7236	1.75132e-41	3.32054e-40	83.3622
C16orf59	2.55759	6.21167	-19.8832	2.19903e-66	1.73693e-64	140.422
KIF23	2.55017	8.64225	-19.3382	1.14069e-63	7.434e-62	134.198
RAD51	2.54482	6.96877	-18.5626	7.90004e-60	4.19216e-58	125.394
CHRNA6	2.53972	2.97754	-13.6561	1.13362e-36	1.67937e-35	72.3502
PRAME	2.5281	4.54173	-5.03613	6.49069e-07	1.4891e-06	4.71812
COL1A1	2.52623	16.0891	-13.6913	7.91924e-37	1.18547e-35	72.7067
FAM72D	2.51579	5.51086	-15.2069	1.03602e-43	2.18149e-42	88.4638
POLQ	2.51285	6.76476	-15.7812	2.14249e-46	5.20884e-45	94.612
BMP8A	2.51041	7.63911	-18.7658	7.83975e-61	4.36277e-59	127.694
CTXN1	2.50589	7.89572	-17.363	5.84605e-54	2.15024e-52	111.942
CCDC78	2.49878	5.30527	-10.917	3.3419e-25	2.62798e-24	46.1361
HIST1H2AM	2.49696	3.11275	-14.5773	8.17082e-41	1.49784e-39	81.8308
RECQL4	2.49585	7.97895	-16.9859	3.89441e-52	1.28366e-50	107.764
RAB26	2.49027	6.24099	-12.2692	1.09102e-30	1.1673e-29	58.6664
CENPI	2.48105	5.68849	-15.0324	6.65217e-43	1.36222e-41	86.6145
DQX1	2.47235	3.14786	-9.46862	8.83124e-20	4.9874e-19	33.7768
PRC1	2.46228	9.70451	-18.8022	5.18202e-61	2.92171e-59	128.106
HIST2H2AA3	2.46149	9.02406	-14.7082	2.06136e-41	3.89116e-40	83.2001
HTR1D	2.45746	3.40618	-12.3499	5.00126e-31	5.44264e-30	59.4407
PAQR4	2.43888	9.57645	-18.9225	1.31524e-61	7.74681e-60	129.472
KIF11	2.43011	9.24694	-19.3392	1.12717e-63	7.3739e-62	134.21
ZWINT	2.41322	9.1108	-20.0829	2.21033e-67	1.90377e-65	142.71
ARTN	2.40555	4.93106	-11.2385	1.79473e-26	1.50645e-25	49.035
SALL4	2.40062	4.54389	-15.2661	5.49674e-44	1.17621e-42	89.0942
RAMP1	2.39635	6.66273	-10.6284	4.40761e-24	3.24233e-23	43.5803
PPP2R2C	2.3929	6.81072	-6.34091	4.83784e-10	1.43139e-09	11.7121
HIST1H2BD	2.38907	8.91141	-14.2085	3.84534e-39	6.46802e-38	78.0018
CKS2	2.37837	8.86247	-20.6153	4.75885e-70	5.00409e-68	148.824
CAMP	2.37098	2.79624	-9.3828	1.78191e-19	9.89051e-19	33.0829
FNDC1	2.36989	9.87804	-12.4755	1.47593e-31	1.64911e-30	60.6523
RDM1	2.35914	3.21208	-13.6743	9.41805e-37	1.40492e-35	72.5344
EEF1A2	2.35337	8.43438	-6.00611	3.49822e-09	9.63206e-09	9.78271
BGN	2.34336	13.2612	-18.6954	1.74587e-60	9.59403e-59	126.897
2019-03-04	2.34209	2.46203	-11.6587	3.64163e-28	3.35038e-27	52.9005
BMPR1B	2.33974	8.85586	-5.51321	5.47289e-08	1.37565e-07	7.10983
IFI6	2.33738	11.3541	-10.8839	4.49958e-25	3.49605e-24	45.8414
KIF18A	2.33712	7.01202	-16.4079	2.30003e-49	6.49466e-48	101.414
ZNF695	2.32861	5.01059	-11.2473	1.65616e-26	1.39492e-25	49.1147
ACTL8	2.32678	2.35662	-7.17669	2.37861e-12	8.24457e-12	16.9156
E2F1	2.3247	7.88713	-15.455	7.24443e-45	1.61679e-43	91.1098
MATN3	2.31486	8.12645	-11.1474	4.13078e-26	3.40884e-25	48.2085
DIAPH3	2.31361	7.02035	-14.2779	1.86947e-39	3.20428e-38	78.7187
CNTD2	2.30711	5.32035	-9.70697	1.22813e-20	7.31671e-20	35.7276
CCNB1	2.30412	9.5279	-19.604	5.42632e-65	4.02628e-63	137.23
HES6	2.29792	6.34296	-13.4839	6.52782e-36	9.29293e-35	70.6106
GPRC5A	2.29758	11.1145	-12.7785	7.57062e-33	9.13163e-32	63.6016
LMNB1	2.28777	9.84632	-18.8615	2.63585e-61	1.52116e-59	128.779
IL21R	2.2865	5.79374	-11.8631	5.30449e-29	5.1483e-28	54.8118
METRN	2.27543	8.00091	-11.1046	6.10312e-26	5.01233e-25	47.8215
EME1	2.27034	5.97172	-15.6367	1.0237e-45	2.38725e-44	93.0562
GRM8	2.26774	3.12418	-15.2726	5.12881e-44	1.10022e-42	89.1631
CCR8	2.26287	3.11089	-11.5118	1.43639e-27	1.28028e-26	51.5393
PRR11	2.25943	6.30138	-11.6613	3.55412e-28	3.27338e-27	52.9246
ITPKA	2.25938	2.95306	-11.0793	7.6857e-26	6.273e-25	47.593
FAM72B	2.25514	6.4434	-14.0671	1.66521e-38	2.70538e-37	76.5449
SYNGR3	2.25453	4.79457	-11.5616	9.02951e-28	8.14128e-27	51.9997
HOXC13	2.25135	6.66194	-8.62795	7.03299e-17	3.2999e-16	27.1794
INSM1	2.2475	3.25062	-6.25118	8.29254e-10	2.39889e-09	11.1861
PYCR1	2.24399	10.6775	-21.1158	1.45837e-72	1.89367e-70	154.587
F12	2.24182	6.13284	-12.7802	7.44877e-33	8.99098e-32	63.6177
CDC20B	2.226	2.57441	-5.77683	1.28825e-08	3.39076e-08	8.51423
SPOCD1	2.2168	5.66781	-10.7331	1.73807e-24	1.30488e-23	44.5022
TNFRSF9	2.21665	3.58217	-10.7172	2.00186e-24	1.49899e-23	44.3622
NKX3-2	2.21582	3.50038	-11.2739	1.29729e-26	1.09914e-25	49.3568
TACC3	2.21537	9.14373	-18.2532	2.6307e-58	1.26658e-56	121.905
SPP1	2.21355	11.31	-9.66234	1.78149e-20	1.04822e-19	35.3598
ATP1A3	2.21202	4.21641	-8.42544	3.28623e-16	1.47798e-15	25.6588
CDT1	2.21111	7.34633	-13.9163	7.88963e-38	1.23383e-36	74.9987
HIST1H2BH	2.20676	3.47949	-11.1048	6.09244e-26	5.00596e-25	47.8233
MMP3	2.20105	6.92827	-8.16886	2.22852e-15	9.48284e-15	23.7723
CGA	2.19621	2.40736	-5.19122	2.96544e-07	7.02137e-07	5.47421
PAFAH1B3	2.19596	9.58764	-22.4051	4.64099e-79	1.22379e-76	169.484
SLC16A3	2.19027	8.70384	-14.248	2.55221e-39	4.34408e-38	78.4093
E2F2	2.1883	6.94897	-13.98	4.0919e-38	6.48199e-37	75.6513
SAMD14	2.18779	3.81098	-16.098	6.8407e-48	1.79007e-46	98.0385
HIST1H2BC	2.18181	6.43406	-10.6914	2.51977e-24	1.88105e-23	44.1342
PTPRN	2.1807	3.01744	-8.79171	1.98257e-17	9.63188e-17	28.4288
TLCD1	2.17458	7.29714	-16.2949	7.94632e-49	2.17572e-47	100.18
CXCL9	2.17409	9.3688	-7.47987	3.0421e-13	1.12495e-12	18.9349
LRTM2	2.17017	2.41186	-7.54091	1.99473e-13	7.47316e-13	19.3496
GINS1	2.16349	8.07548	-17.1485	6.39015e-53	2.24441e-51	109.562
RTBDN	2.16186	2.1019	-7.5228	2.26139e-13	8.4353e-13	19.2263
PACSIN1	2.16038	5.52942	-13.8851	1.08702e-37	1.68764e-36	74.6802
TRIP13	2.15429	8.06128	-14.6597	3.43418e-41	6.41197e-40	82.6926
MFAP2	2.14047	9.24567	-14.0394	2.21778e-38	3.57599e-37	76.2601
GNG13	2.13804	1.96239	-8.72822	3.24589e-17	1.55752e-16	27.9423
UBE2S	2.13781	8.01125	-16.6021	2.71566e-50	8.0391e-49	103.54
CAPN9	2.13671	5.40398	-7.14295	2.97803e-12	1.02559e-11	16.6951
S100A7	2.13553	3.54042	-4.14121	4.00999e-05	7.855e-05	0.768904
VSTM2A	2.13463	2.97147	-4.60836	5.0724e-06	1.07814e-05	2.74156
KISS1R	2.12514	2.48967	-8.40553	3.8186e-16	1.71024e-15	25.5108
HMGB3	2.12228	10.0587	-15.2764	4.92508e-44	1.05784e-42	89.2034
COX6C	2.1152	12.3583	-12.1179	4.67861e-30	4.8163e-29	57.2214
SQLE	2.1042	10.581	-15.9798	2.4802e-47	6.3354e-46	96.7571
SBK1	2.10395	9.07152	-16.3438	4.6505e-49	1.2898e-47	100.713
TNFRSF18	2.10391	5.81303	-10.2176	1.60524e-22	1.0777e-21	40.0198
S100A14	2.09854	10.8831	-8.39582	4.10816e-16	1.83561e-15	25.4387
CAMK2N2	2.08296	4.12006	-11.6044	6.0538e-28	5.51927e-27	52.3963
OLR1	2.07998	8.10347	-13.7101	6.53557e-37	9.84356e-36	72.8975
TUBA3E	2.07872	3.34441	-6.74122	4.05229e-11	1.298e-10	14.1366
ORM1	2.07668	3.12605	-5.61986	3.06913e-08	7.86203e-08	7.67097
ADAM8	2.07647	8.00039	-12.9801	1.02845e-33	1.29901e-32	65.5841
SCT	2.07267	2.08255	-11.5957	6.56675e-28	5.98055e-27	52.3156
ARHGAP11A	2.06674	8.41394	-15.3748	1.71571e-44	3.76535e-43	90.2522
EZH2	2.06527	8.39199	-17.0176	2.73816e-52	9.13076e-51	108.114
DRP2	2.06166	3.77034	-13.8914	1.01917e-37	1.58516e-36	74.7443
RET	2.05772	8.69812	-6.59551	1.01364e-10	3.15084e-10	13.2395
MAPK8IP2	2.05627	7.98106	-8.97031	4.88587e-18	2.47021e-17	29.8116
JAKMIP1	2.05468	3.72661	-9.11068	1.60217e-18	8.39276e-18	30.9128
KLK4	2.05237	4.75753	-7.83323	2.54757e-14	1.015e-13	21.3735
ARMC3	2.05087	3.75172	-7.54503	1.93855e-13	7.26426e-13	19.3777
NMU	2.04801	2.14463	-7.25939	1.36637e-12	4.81193e-12	17.4596
FOXJ1	2.04797	3.99182	-5.94591	4.94608e-09	1.34785e-08	9.44546
VGF	2.04726	2.34591	-8.66062	5.47056e-17	2.59379e-16	27.4272
NUAK2	2.03649	7.39647	-17.4921	1.38022e-54	5.25711e-53	113.379
HIST1H2BO	2.03398	2.12754	-12.2743	1.03863e-30	1.11263e-29	58.7153
C1QTNF6	2.03213	9.30214	-16.868	1.43895e-51	4.59286e-50	106.463
PROC	2.03182	2.90454	-13.984	3.92856e-38	6.24633e-37	75.6918
CIT	2.02821	8.40908	-16.9862	3.88036e-52	1.28149e-50	107.767
CORIN	2.02181	6.13962	-9.13231	1.34777e-18	7.09268e-18	31.0836
FOXP3	2.01885	5.75384	-11.6749	3.12755e-28	2.89607e-27	53.0515
CHRNA1	2.01658	3.95878	-9.4404	1.113e-19	6.24445e-19	33.5481
NAT1	2.01127	9.47573	-6.05579	2.62286e-09	7.28148e-09	10.0633
HIST1H2BG	2.01089	4.95851	-8.53927	1.38605e-16	6.3811e-16	26.5101
XIRP1	2.00726	3.86784	-8.30592	8.05994e-16	3.53318e-15	24.7744
CAPSL	2.0061	2.60318	-7.61617	1.18107e-13	4.49358e-13	19.8648
COL5A1	1.99974	12.52	-12.3367	5.68581e-31	6.17585e-30	59.3134
DPEP1	1.99683	3.47674	-10.4468	2.18355e-23	1.54017e-22	41.9952
POSTN	1.99606	13.9263	-11.1591	3.71419e-26	3.07394e-25	48.3139
CD80	1.99047	4.50904	-12.1143	4.84089e-30	4.97738e-29	57.1875
TNFSF4	1.98773	6.93683	-14.5253	1.41068e-40	2.55592e-39	81.2878
TYRP1	1.97955	2.48992	-7.21393	1.85428e-12	6.46376e-12	17.1599
AMZ1	1.97615	4.54103	-8.17919	2.06505e-15	8.80909e-15	23.8473
SRMS	1.97591	4.40471	-9.28955	3.80155e-19	2.06787e-18	32.334
KCNK15	1.97496	5.88512	-7.14264	2.98405e-12	1.02745e-11	16.6931
RIMS4	1.97173	7.07458	-5.49317	6.09494e-08	1.52618e-07	7.00546
CD177	1.96321	3.35984	-6.1296	1.70375e-09	4.80932e-09	10.4838
C3orf67	1.96051	5.599	-12.6113	3.91956e-32	4.49975e-31	61.9688
RAD51AP1	1.95736	7.4499	-14.3721	7.00198e-40	1.23218e-38	79.695
KPNA2	1.9435	11.2532	-16.3385	4.92907e-49	1.36485e-47	100.656
GINS2	1.93937	8.05295	-14.4579	2.85753e-40	5.10188e-39	80.586
PYDC1	1.93788	2.8488	-5.3966	1.01925e-07	2.50898e-07	6.50725
MAD2L1	1.92792	8.31156	-15.0117	8.28838e-43	1.68921e-41	86.3958
POC1A	1.92591	7.41713	-19.4768	2.3337e-64	1.61942e-62	135.778
CCNE1	1.92415	6.10377	-9.77934	6.70187e-21	4.049e-20	36.3268
HN1	1.91756	10.5673	-16.6023	2.70995e-50	8.03607e-49	103.542
TREM1	1.9055	4.75841	-9.1557	1.11754e-18	5.90648e-18	31.2686
COL5A2	1.90159	12.8279	-11.8445	6.32523e-29	6.1182e-28	54.6372
CDC25A	1.90036	6.72889	-11.8789	4.56382e-29	4.4572e-28	54.961
HIST1H1C	1.89853	9.43239	-9.4975	6.96586e-20	3.96134e-19	34.0114
TUBA3D	1.89062	3.90224	-5.65132	2.58309e-08	6.66279e-08	7.83834
FAM57B	1.88725	3.48707	-7.75131	4.56256e-14	1.78097e-13	20.8002
NBPF6	1.88621	3.20038	-5.19573	2.89781e-07	6.87358e-07	5.4965
RNFT2	1.88456	6.17687	-14.8177	6.48777e-42	1.25935e-40	84.3496
IL4I1	1.88325	6.68177	-10.4149	2.88692e-23	2.0172e-22	41.7187
TYMS	1.88202	8.89732	-13.9252	7.19454e-38	1.12719e-36	75.0904
TMEM92	1.8816	3.4121	-9.85611	3.51359e-21	2.15544e-20	36.9656
APOBEC3B	1.88049	6.96712	-8.47471	2.26407e-16	1.02934e-15	26.0262
CXCL13	1.8795	6.73189	-5.03978	6.37341e-07	1.46435e-06	4.73571
FANCA	1.87928	7.44596	-12.2252	1.66776e-30	1.76562e-29	58.2452
STIL	1.87791	8.14164	-15.1667	1.59134e-43	3.31416e-42	88.037
EDN2	1.87626	5.78197	-8.06354	4.82679e-15	2.00999e-14	23.011
CST5	1.87186	2.00536	-5.19897	2.85021e-07	6.76817e-07	5.5125
CSMD2	1.87086	4.71291	-9.77271	7.08511e-21	4.27752e-20	36.2718
ZMYND10	1.86926	6.67852	-7.16021	2.65492e-12	9.1763e-12	16.8077
CREB3L1	1.8619	9.66301	-10.2692	1.02712e-22	6.99996e-22	40.4619
COL22A1	1.85675	5.03359	-7.59224	1.39591e-13	5.28633e-13	19.7005
FBXO43	1.85662	3.96078	-13.9825	3.98888e-38	6.33049e-37	75.6766
CENPK	1.85549	6.10392	-13.379	1.8863e-35	2.63069e-34	69.5563
EMX1	1.84832	2.74702	-6.21989	9.99141e-10	2.87482e-09	11.0042
HELLS	1.84253	7.211	-14.5452	1.14408e-40	2.08169e-39	81.4961
TMEM215	1.84182	2.19147	-7.66258	8.5321e-14	3.27966e-13	20.1845
HSH2D	1.84182	7.40225	-9.01145	3.52822e-18	1.7982e-17	30.1331
WBSCR28	1.83549	1.80013	-10.9565	2.33846e-25	1.85992e-24	46.49
BLM	1.83529	7.23919	-13.6275	1.51721e-36	2.23027e-35	72.0606
BRIP1	1.83367	6.81662	-11.5887	7.01134e-28	6.36854e-27	52.2507
RHPN1	1.82976	8.6477	-13.7315	5.24785e-37	7.92495e-36	73.1156
HHIPL2	1.82601	3.54499	-6.41502	3.08552e-10	9.24737e-10	12.1514
CASP14	1.82477	2.23749	-4.63902	4.39979e-06	9.40422e-06	2.8779
ASCL1	1.81777	2.2385	-4.78015	2.26291e-06	4.95417e-06	3.51602
EPN3	1.81751	9.08122	-11.9181	3.14804e-29	3.10815e-28	55.3295
RTKN2	1.81542	7.20224	-13.4488	9.31747e-36	1.31441e-34	70.2571
HIST1H2BJ	1.80591	5.2446	-9.57067	3.81038e-20	2.19825e-19	34.6079
CBLN2	1.80557	3.48005	-4.55933	6.35714e-06	1.33941e-05	2.52534
TNNI3	1.80008	2.15886	-6.25059	8.32175e-10	2.40693e-09	11.1827
ASPN	1.79814	10.2712	-7.74528	4.76195e-14	1.85626e-13	20.7581
DIO1	1.79717	5.05433	-4.88813	1.34519e-06	3.00175e-06	4.01613
KCNH1	1.79707	5.40002	-6.37773	3.87116e-10	1.15294e-09	11.9298
TRIM59	1.79696	8.11475	-18.5107	1.42378e-59	7.3727e-58	124.808
ULBP1	1.79672	3.97109	-8.23924	1.32405e-15	5.72799e-15	24.2852
LRFN2	1.79308	2.79747	-9.124	1.44036e-18	7.56596e-18	31.0179
CDH2	1.79155	6.38946	-8.39452	4.14852e-16	1.85268e-15	25.4291
HIST1H2BF	1.79099	2.15871	-10.0202	8.73804e-22	5.55527e-21	38.3426
CAPS	1.79079	8.31104	-8.78721	2.05323e-17	9.96666e-17	28.3943
ERMN	1.79013	4.40341	-8.92541	6.96126e-18	3.48164e-17	29.462
HIST2H4A	1.78886	8.7718	-10.673	2.96511e-24	2.20294e-23	43.973
SULF1	1.78674	12.1864	-12.0904	6.08664e-30	6.22464e-29	56.9603
HIST1H2AE	1.78564	5.40082	-7.75384	4.48158e-14	1.74976e-13	20.8178
LHX2	1.78503	2.15804	-8.41701	3.50204e-16	1.57257e-15	25.5961
SLC30A8	1.78393	4.41018	-3.6337	0.000306141	0.000546247	-1.14931
CELSR3	1.7759	7.17703	-9.0902	1.8867e-18	9.81127e-18	30.7513
UNC13A	1.77274	3.87543	-7.4263	4.39637e-13	1.60361e-12	18.5731
IL20	1.77142	3.99072	-5.03678	6.4696e-07	1.48485e-06	4.72126
FANCI	1.77063	9.74098	-16.9305	7.19872e-52	2.34574e-50	107.152
ATAD2	1.76367	10.4536	-14.046	2.07027e-38	3.34759e-37	76.3285
TMEM132A	1.76083	9.99021	-12.6688	2.22848e-32	2.60015e-31	62.5294
VCAN	1.75877	12.7327	-10.7592	1.37633e-24	1.04243e-23	44.7334
HIST1H2BK	1.75611	10.3215	-11.5947	6.62668e-28	6.03193e-27	52.3066
DBNDD1	1.75265	9.25588	-14.2721	1.98594e-39	3.3971e-38	78.6587
APOC2	1.74948	6.09197	-9.26266	4.72544e-19	2.5476e-18	32.1191
LHFPL5	1.74857	2.13735	-7.59617	1.3581e-13	5.1511e-13	19.7275
SLC7A5	1.7468	10.1871	-9.36627	2.03886e-19	1.12766e-18	32.9498
FCGR1A	1.74543	6.67224	-12.6777	2.04329e-32	2.39385e-31	62.6156
SIX2	1.74387	6.02306	-7.16568	2.55979e-12	8.85288e-12	16.8435
C4orf48	1.74251	4.46806	-9.47179	8.60432e-20	4.86245e-19	33.8026
RACGAP1	1.74136	9.63291	-16.3315	5.31994e-49	1.46598e-47	100.58
SPDYC	1.73958	1.72081	-5.19849	2.85721e-07	6.78197e-07	5.51013
FAP	1.73281	9.77479	-11.2509	1.60162e-26	1.35031e-25	49.1479
C2orf54	1.73252	5.50833	-4.75558	2.54373e-06	5.54348e-06	3.40365
RDH16	1.72959	4.36077	-7.50092	2.63082e-13	9.77504e-13	19.0776
OR2B6	1.72643	1.73748	-10.6847	2.67363e-24	1.9933e-23	44.0755
FIBCD1	1.72469	3.6189	-5.66748	2.36353e-08	6.11678e-08	7.9246
CRIP1	1.72461	11.2142	-7.69247	6.91467e-14	2.66991e-13	20.3912
MUC1	1.72395	12.2556	-7.35016	7.39349e-13	2.65225e-12	18.0626
PLA2G10	1.72003	2.85308	-7.04378	5.73652e-12	1.93437e-11	16.0521
ADAM19	1.7147	8.52526	-12.9128	2.00489e-33	2.50282e-32	64.9211
GAL3ST2	1.71387	1.99456	-7.23059	1.6583e-12	5.80779e-12	17.2696
CBX2	1.71367	7.7149	-7.98624	8.47087e-15	3.47263e-14	22.4572
ADM2	1.71332	7.53187	-11.005	1.50805e-25	1.21067e-24	46.9248
HIST2H3C	1.71137	2.08004	-10.9316	2.92864e-25	2.31215e-24	46.267
ECT2	1.70914	9.97614	-16.5432	5.19741e-50	1.5202e-48	102.894
RHBDL1	1.7054	4.94624	-7.92021	1.36501e-14	5.5206e-14	21.9875
UNC5B	1.70221	10.2168	-14.9263	2.05364e-42	4.07873e-41	85.4935
OASL	1.6999	7.58691	-8.52056	1.5983e-16	7.33855e-16	26.3696
S100A7A	1.69623	1.91732	-4.41864	1.20136e-05	2.47493e-05	1.91678
TLL2	1.69547	3.46577	-9.2251	6.39841e-19	3.4186e-18	31.8196
EPHA8	1.6942	2.19781	-6.7492	3.85207e-11	1.23595e-10	14.1862
COL3A1	1.6873	15.8249	-9.50866	6.35513e-20	3.62245e-19	34.1021
CST6	1.68655	4.95801	-7.09733	4.03002e-12	1.37434e-11	16.3983
ANKRD22	1.68374	7.08993	-10.0763	5.41149e-22	3.49221e-21	38.8168
SPATA17	1.6823	5.65299	-10.3942	3.45915e-23	2.40624e-22	41.5396
TLX1	1.68105	1.95215	-5.55201	4.43905e-08	1.12386e-07	7.31287
PRR19	1.67898	5.60737	-17.625	3.11547e-55	1.25645e-53	114.861
HIST1H2AD	1.67614	1.9084	-10.1726	2.36526e-22	1.56891e-21	39.6361
STARD10	1.6759	11.1966	-10.1707	2.40506e-22	1.59407e-21	39.6196
PTK6	1.675	7.78098	-8.99236	4.10403e-18	2.08486e-17	29.9838
OTX1	1.67443	4.09539	-7.7926	3.40331e-14	1.34037e-13	21.0885
DMBX1	1.66984	2.40117	-7.95786	1.04025e-14	4.23917e-14	22.255
C9orf172	1.66979	3.66499	-11.2914	1.10403e-26	9.3958e-26	49.5168
HIST1H2AG	1.669	2.76054	-8.56983	1.09774e-16	5.09072e-16	26.7402
SCUBE3	1.66765	5.94615	-6.15146	1.4981e-09	4.24703e-09	10.6092
H2AFX	1.66567	9.08045	-15.2058	1.04778e-43	2.20355e-42	88.4526
COL1A2	1.66116	15.9118	-9.45563	9.82376e-20	5.53151e-19	33.6715
KIF4B	1.65974	2.70592	-13.8181	2.16179e-37	3.3172e-36	73.9969
NPTX2	1.65823	4.8051	-7.50487	2.56e-13	9.52016e-13	19.1045
ZBED2	1.65782	3.2651	-7.27983	1.19055e-12	4.2109e-12	17.5948
NUP210	1.65687	11.0057	-15.9702	2.75363e-47	7.02339e-46	96.653
HIST3H2BB	1.65651	2.33517	-9.45	1.02881e-19	5.78155e-19	33.6259
HOXC10	1.65372	8.18185	-5.56161	4.21414e-08	1.06913e-07	7.36331
LRRC46	1.6522	5.75698	-8.21419	1.59422e-15	6.84491e-15	24.1023
GRIN2D	1.64852	5.32143	-10.2967	8.0872e-23	5.53572e-22	40.6986
MNX1	1.64643	2.72884	-6.13784	1.62313e-09	4.58932e-09	10.531
KCNJ3	1.64628	4.53254	-3.35848	0.00083915	0.00143143	-2.0898
IGF2BP1	1.64379	2.01411	-8.2192	1.53611e-15	6.60312e-15	24.1389
TPRN	1.63505	8.83529	-13.6065	1.87902e-36	2.7574e-35	71.848
CCNF	1.63198	8.90798	-16.6061	2.60014e-50	7.72382e-49	103.583
LEF1	1.63171	8.29364	-11.4702	2.11376e-27	1.87041e-26	51.1561
FAM196A	1.63164	4.92054	-4.91359	1.18828e-06	2.66656e-06	4.1355
TSTA3	1.62925	10.5856	-16.7937	3.27731e-51	1.01579e-49	105.644
TPD52	1.62863	12.3996	-14.1061	1.11238e-38	1.82452e-37	76.9459
HIST1H2BE	1.62631	3.40863	-12.4016	3.0302e-31	3.33704e-30	59.9381
STRA6	1.62535	6.71406	-10.1735	2.34683e-22	1.55728e-21	39.6438
PLAUR	1.62413	9.05265	-12.437	2.14872e-31	2.38375e-30	60.2794
ATP6V0D2	1.61903	4.01127	-6.93475	1.16966e-11	3.86655e-11	15.3537
ECE2	1.61513	7.35858	-14.022	2.65341e-38	4.25838e-37	76.0818
NBPF4	1.60995	4.65097	-4.25163	2.50169e-05	4.99173e-05	1.21746
HIST1H4J	1.60866	4.31543	-10.4271	2.59456e-23	1.8181e-22	41.8244
RIBC2	1.6038	5.09573	-11.3307	7.68395e-27	6.59834e-26	49.8762
BRSK2	1.60355	2.92255	-5.61542	3.1445e-08	8.05269e-08	7.64742
ENTHD1	1.602	2.07908	-9.45458	9.90919e-20	5.57778e-19	33.663
C9orf116	1.59619	6.8077	-9.7453	8.9139e-21	5.34772e-20	36.0446
PAX7	1.59549	1.77021	-4.77264	2.34539e-06	5.1282e-06	3.48163
SYT5	1.59514	1.94323	-6.19929	1.12919e-09	3.23704e-09	10.8849
NME1	1.59323	10.5372	-14.9557	1.50272e-42	3.00895e-41	85.8041
SORD	1.59288	10.0037	-11.8025	9.40746e-29	8.97794e-28	54.2433
IFI30	1.59045	11.2552	-12.5538	6.87613e-32	7.81026e-31	61.4107
LYPD1	1.58642	5.36613	-10.0964	4.55433e-22	2.95462e-21	38.9875
HIST2H2BE	1.58597	10.058	-9.49521	7.09836e-20	4.03134e-19	33.9928
ADAMTSL2	1.58563	6.74048	-10.9694	2.08261e-25	1.66105e-24	46.6049
PRR15	1.58481	8.08902	-6.04496	2.79329e-09	7.73957e-09	10.0019
KIAA1524	1.58217	7.44473	-12.04	9.8568e-30	9.97907e-29	56.4818
SCG2	1.5792	5.20031	-7.74725	4.69568e-14	1.83126e-13	20.7719
SPEF1	1.57905	4.20266	-7.15947	2.66794e-12	9.21944e-12	16.8029
SDC1	1.57388	12.262	-10.2308	1.43148e-22	9.66345e-22	40.1332
KRT8	1.57348	13.9409	-11.5431	1.0733e-27	9.63164e-27	51.8283
HIST1H3G	1.57285	1.80014	-7.76833	4.04394e-14	1.58358e-13	20.9188
FAM83H	1.57231	11.0962	-15.6612	7.84914e-46	1.84546e-44	93.3204
SAMD11	1.57227	5.31513	-5.66179	2.43869e-08	6.3055e-08	7.8942
PLK4	1.57152	7.5551	-13.3194	3.44278e-35	4.72452e-34	68.9586
ARHGAP11B	1.56932	4.42391	-10.4316	2.49576e-23	1.75461e-22	41.8628
KCNG3	1.56928	2.59848	-8.16926	2.22204e-15	9.45994e-15	23.7752
RNASEH2A	1.56849	8.84543	-17.5776	5.29522e-55	2.08414e-53	114.333
PIF1	1.56844	4.57651	-9.44308	1.08878e-19	6.11459e-19	33.5699
CACNG1	1.56733	3.32331	-5.68725	2.1194e-08	5.50236e-08	8.03048
TYMP	1.56621	9.91125	-10.2177	1.60284e-22	1.07651e-21	40.0213
CDC7	1.56261	7.64592	-12.2999	8.11355e-31	8.75732e-30	58.9604
RCC1	1.56203	9.49459	-13.8538	1.49942e-37	2.3174e-36	74.3606
NPW	1.55846	2.01274	-6.47134	2.18595e-10	6.61732e-10	12.4881
IGSF9	1.55697	9.23559	-11.7166	2.11439e-28	1.97928e-27	53.4398
GSG2	1.55635	5.49518	-11.3854	4.63758e-27	4.02268e-26	50.3769
DNA2	1.55449	7.13528	-12.8489	3.77865e-33	4.63277e-32	64.2917
TSPAN1	1.55365	9.33974	-5.32226	1.50625e-07	3.66408e-07	6.12918
CLGN	1.54845	7.05292	-5.26285	2.05132e-07	4.93607e-07	5.83042
PSRC1	1.54717	7.18256	-13.5862	2.31044e-36	3.37029e-35	71.6427
POLE2	1.54644	6.32131	-13.5457	3.48689e-36	5.04348e-35	71.2337
FABP6	1.54562	1.51706	-6.00878	3.44461e-09	9.48747e-09	9.79775
HIST1H1D	1.54361	2.71799	-7.58587	1.45926e-13	5.5116e-13	19.6569
LAGE3	1.54267	8.64642	-15.7591	2.72274e-46	6.58219e-45	94.3736
ADAM12	1.54086	10.5953	-9.05577	2.48181e-18	1.27819e-17	30.4805
ELAVL2	1.53946	4.72123	-6.70184	5.20012e-11	1.64811e-10	13.8925
CLDN14	1.53735	2.8064	-9.10683	1.65221e-18	8.65225e-18	30.8824
KCNF1	1.53726	5.07367	-5.15914	3.49281e-07	8.20205e-07	5.3161
TUBA1C	1.537	11.7024	-17.9601	7.19618e-57	3.21204e-55	118.611
LINGO1	1.53284	7.57985	-7.59052	1.41272e-13	5.34526e-13	19.6887
KIF1A	1.5293	4.29413	-3.67046	0.000266224	0.00047821	-1.01834
UMODL1	1.5271	3.10987	-6.457	2.38694e-10	7.20666e-10	12.4022
HMP19	1.52694	2.10284	-5.88504	6.99957e-09	1.88286e-08	9.1075
MCM2	1.52504	9.92507	-13.3503	2.5208e-35	3.49015e-34	69.2682
HS6ST3	1.52479	6.00061	-4.39913	1.31044e-05	2.6909e-05	1.83381
CCL7	1.52196	1.7941	-6.23115	9.34408e-10	2.69625e-09	11.0696
TIGD3	1.52111	3.78916	-11.7249	1.95433e-28	1.83345e-27	53.5179
SLC11A1	1.51645	6.30429	-9.95775	1.4864e-21	9.32194e-21	37.8168
MIF	1.51619	11.4333	-12.5574	6.64263e-32	7.55505e-31	61.445
GPR19	1.51528	4.28409	-8.76696	2.40332e-17	1.16102e-16	28.2389
KCNE4	1.51264	8.91718	-5.74897	1.50502e-08	3.93653e-08	8.36307
C15orf48	1.51028	7.85854	-7.4128	4.82235e-13	1.75526e-12	18.4823
RGS4	1.50682	7.42288	-8.22853	1.43355e-15	6.18139e-15	24.207
SYCE2	1.50421	3.61022	-10.4912	1.47845e-23	1.05279e-22	42.3814
TEX19	1.50388	1.55991	-7.77884	3.75314e-14	1.47307e-13	20.9923
VSTM2L	1.50377	4.83863	-5.46313	7.1581e-08	1.78406e-07	6.84962
ADORA2A	1.50272	7.3761	-8.37632	4.75698e-16	2.11668e-15	25.2942
ESRP1	1.50133	11.5337	-14.8352	5.39262e-42	1.05153e-40	84.5334
RASL11B	1.49754	6.62699	-9.68738	1.44607e-20	8.57637e-20	35.5661
CFB	1.49536	12.0202	-5.73397	1.63602e-08	4.27396e-08	8.28196
TRIB3	1.49441	9.52069	-13.138	2.12801e-34	2.80139e-33	67.149
SLC9A3R1	1.4944	12.1127	-10.1792	2.23518e-22	1.4855e-21	39.6921
DNAJC5B	1.49425	3.27546	-7.7802	3.71709e-14	1.45959e-13	21.0018
MORN3	1.49411	3.95306	-9.17669	9.44372e-19	5.00953e-18	31.4349
DEGS2	1.49246	8.82765	-5.41497	9.24807e-08	2.28469e-07	6.60142
SOX12	1.49231	9.59155	-14.3265	1.12698e-39	1.95709e-38	79.2219
GPR84	1.49173	4.78901	-9.59446	3.12959e-20	1.81282e-19	34.8025
GJA3	1.48554	2.203	-9.07041	2.20891e-18	1.14279e-17	30.5956
PVALB	1.4849	3.43394	-3.47625	0.000549512	0.000955043	-1.69602
ZNF367	1.48489	7.48937	-12.7631	8.8162e-33	1.05967e-31	63.4503
CDKN2A	1.48439	6.71546	-7.37441	6.26837e-13	2.26332e-12	18.2247
COL24A1	1.47782	5.0342	-10.546	9.12969e-24	6.58321e-23	42.8589
MB	1.47581	8.17952	-8.85199	1.23854e-17	6.10368e-17	28.8932
ALG1L	1.47503	3.84765	-5.80879	1.07688e-08	2.84841e-08	8.68846
LY6H	1.47482	2.64612	-8.85289	1.22985e-17	6.06431e-17	28.9002
RAD54B	1.47133	7.26414	-11.9927	1.54796e-29	1.55522e-28	56.0339
MSMB	1.4709	4.28617	-4.12555	4.28376e-05	8.3645e-05	0.706206
DPP3	1.46976	10.0726	-17.0349	2.25989e-52	7.595e-51	108.305
GPR68	1.46934	7.50889	-11.8064	9.06874e-29	8.67401e-28	54.2797
IGFBPL1	1.46773	1.90129	-7.4128	4.82233e-13	1.75526e-12	18.4823
MICAL2	1.46319	10.9207	-13.8351	1.81675e-37	2.80028e-36	74.1698
IRF7	1.46201	8.85708	-10.8397	6.69262e-25	5.15325e-24	45.4479
XRCC2	1.45854	6.13845	-11.4338	2.96341e-27	2.60209e-26	50.821
KCNJ10	1.45634	3.5159	-7.39305	5.51975e-13	1.99934e-12	18.3496
GINS4	1.45568	7.41305	-10.0571	6.37389e-22	4.07948e-21	38.6548
PYCRL	1.45517	8.69379	-13.6973	7.44483e-37	1.1164e-35	72.768
B4GALNT4	1.45499	8.20363	-9.38141	1.80231e-19	9.99726e-19	33.0717
STMN1	1.45335	11.5136	-11.9841	1.6806e-29	1.68551e-28	55.9523
MCM4	1.44845	10.8255	-12.8607	3.35957e-33	4.13374e-32	64.4084
RAB31	1.44542	11.5241	-9.89859	2.45421e-21	1.52025e-20	37.3207
F7	1.44529	5.24648	-4.7761	2.30704e-06	5.04693e-06	3.49746
SERPINB7	1.4434	2.82578	-5.033	6.59267e-07	1.51128e-06	4.70309
PNCK	1.43931	3.46355	-5.50719	5.65289e-08	1.41923e-07	7.07846
AP1M2	1.43874	10.7115	-13.9807	4.06454e-38	6.4446e-37	75.6579
GALE	1.43761	9.05758	-12.7955	6.40601e-33	7.77614e-32	63.7674
SIX4	1.43431	8.52164	-11.2455	1.68376e-26	1.41678e-25	49.0983
IER5L	1.43235	7.82469	-12.2595	1.19903e-30	1.27886e-29	58.5727
KRT19	1.43017	14.0434	-8.52504	1.54478e-16	7.09853e-16	26.4032
PAX1	1.42947	2.32754	-6.16136	1.4132e-09	4.0143e-09	10.6661
KRT37	1.42645	1.6031	-7.20209	2.00729e-12	6.98295e-12	17.0821
LLGL2	1.426	10.1537	-14.0074	3.0863e-38	4.93003e-37	75.9316
FAM83A	1.42581	4.35329	-4.59717	5.34159e-06	1.13296e-05	2.69202
PRR7	1.42421	4.85669	-9.2851	3.94106e-19	2.13968e-18	32.2984
RHBG	1.42353	2.55233	-6.81614	2.51323e-11	8.15816e-11	14.6044
PARD6B	1.42186	9.0886	-7.43323	4.19251e-13	1.53186e-12	18.6198
SLC39A4	1.42173	7.98283	-8.40792	3.75044e-16	1.68015e-15	25.5286
POLR3K	1.42	8.77094	-17.9641	6.88381e-57	3.08064e-55	118.655
CACNG4	1.41923	9.54554	-4.53527	7.0965e-06	1.4908e-05	2.42003
MEX3A	1.4174	9.16628	-7.83645	2.48948e-14	9.9255e-14	21.3962
KLHL38	1.4161	4.02349	-7.26005	1.36038e-12	4.79181e-12	17.4639
MYLK2	1.41453	2.01059	-10.9117	3.50531e-25	2.74845e-24	46.0888
HPN	1.41249	8.47967	-5.44822	7.75039e-08	1.9258e-07	6.77258
CADPS	1.41024	2.72484	-7.95373	1.07178e-14	4.36558e-14	22.2256
C16orf71	1.41013	4.78887	-8.10431	3.58191e-15	1.50328e-14	23.3048
RELT	1.41006	7.04509	-13.4881	6.25777e-36	8.92331e-35	70.6526
TIMELESS	1.40884	9.71995	-16.4419	1.58469e-49	4.53448e-48	101.785
MMP12	1.40617	4.35549	-4.17657	3.45153e-05	6.80147e-05	0.911364
PPM1J	1.40502	6.99387	-7.81499	2.90157e-14	1.15016e-13	21.2454
NETO1	1.40408	2.71046	-5.78218	1.25022e-08	3.29319e-08	8.54335
DUSP13	1.4039	1.74853	-6.21624	1.0211e-09	2.93701e-09	10.983
SMC4	1.40254	10.8421	-15.3857	1.52609e-44	3.35347e-43	90.3687
CIB3	1.40114	1.80665	-7.66822	8.20103e-14	3.15523e-13	20.2234
CSAG3	1.40104	1.61764	-5.08356	5.11874e-07	1.18545e-06	4.94716
FGFR3	1.40081	7.44226	-5.35807	1.24867e-07	3.05701e-07	6.31069
LRP8	1.39706	6.97645	-8.64891	5.98662e-17	2.82596e-16	27.3383
PXDNL	1.39407	4.68359	-5.38321	1.09387e-07	2.68726e-07	6.43883
PMAIP1	1.39222	7.91161	-8.16542	2.28575e-15	9.71671e-15	23.7473
SRD5A2	1.39147	2.41563	-7.40738	5.00456e-13	1.8181e-12	18.4459
KIF24	1.39145	7.477	-14.2067	3.91841e-39	6.57801e-38	77.9831
GBP5	1.39075	7.83782	-5.96539	4.42323e-09	1.21012e-08	9.55424
TJP3	1.39054	9.26334	-8.90211	8.36069e-18	4.16093e-17	29.2812
SLC16A6	1.38879	7.46128	-5.51066	5.54838e-08	1.39401e-07	7.09655
KRT75	1.38818	2.0291	-4.84157	1.6854e-06	3.73226e-06	3.79924
FEN1	1.38376	9.40418	-14.6951	2.36493e-41	4.45439e-40	83.0635
ENTPD8	1.38316	4.25771	-5.1431	3.7895e-07	8.86716e-07	5.23738
MAGEA1	1.38279	1.27038	-4.66807	3.84237e-06	8.25621e-06	3.00779
PRRT3	1.38077	7.5859	-8.73474	3.08581e-17	1.48237e-16	27.9922
PCDH17	1.3804	7.54865	-12.3293	6.10426e-31	6.62616e-30	59.2429
DNAH14	1.37982	7.14792	-13.4397	1.02183e-35	1.43913e-34	70.1654
KIFC2	1.3798	8.66975	-10.0041	1.00214e-21	6.34765e-21	38.207
DOK7	1.37715	5.4573	-4.56371	6.23055e-06	1.31452e-05	2.5446
SLC12A8	1.37713	8.49773	-13.5177	4.63585e-36	6.64924e-35	70.9507
ECM1	1.37505	10.1527	-6.32208	5.41976e-10	1.59613e-09	11.6012
CRB3	1.37399	7.76909	-15.0184	7.72205e-43	1.57943e-41	86.4661
TMEM151A	1.37239	1.77188	-6.43627	2.71e-10	8.15332e-10	12.2782
ANXA9	1.36681	8.29258	-5.58	3.81395e-08	9.70472e-08	7.46012
ORM2	1.36675	2.40613	-4.02369	6.54941e-05	0.000125427	0.303692
CD1A	1.36554	2.97456	-4.95652	9.62776e-07	2.17819e-06	4.33814
LOXL1	1.36513	9.55025	-10.2035	1.81207e-22	1.21324e-21	39.8998
FADS2	1.36459	10.6923	-5.64827	2.62676e-08	6.76829e-08	7.82206
EPCAM	1.36393	12.0346	-12.6408	2.93402e-32	3.39562e-31	62.2563
KRT18	1.36263	13.4121	-9.96448	1.40389e-21	8.83035e-21	37.8734
SIAH2	1.35623	10.6495	-10.5342	1.01293e-23	7.28869e-23	42.756
SLC7A11	1.3562	6.80617	-7.5316	2.12779e-13	7.95602e-13	19.2862
ARHGAP39	1.3541	8.48828	-13.6975	7.43287e-37	1.11558e-35	72.7696
TUBA3C	1.35161	1.54027	-6.0625	2.52239e-09	7.01391e-09	10.1013
MAGEA6	1.34991	1.36154	-3.54732	0.000423119	0.000743668	-1.4521
HIST1H4E	1.34937	2.15948	-8.23772	1.33909e-15	5.78864e-15	24.2741
MTHFD2	1.34822	10.7482	-14.9678	1.32255e-42	2.6575e-41	85.9311
SLAMF8	1.34763	8.18152	-8.34069	6.21442e-16	2.74029e-15	25.0307
FAM173A	1.34542	6.7627	-11.2048	2.44424e-26	2.04163e-25	48.7287
ETV7	1.3443	6.0428	-7.23548	1.60471e-12	5.62815e-12	17.3018
COL12A1	1.34424	13.1189	-7.9783	8.97235e-15	3.67031e-14	22.4006
EVPL	1.34286	9.38499	-10.6701	3.04297e-24	2.25884e-23	43.9473
ADAMTS4	1.34231	9.04488	-8.3896	4.30498e-16	1.92054e-15	25.3926
MAL2	1.34197	12.3759	-11.0618	9.01449e-26	7.31921e-25	47.4349
CPNE7	1.34023	5.3368	-5.55461	4.3771e-08	1.10916e-07	7.32651
GPR141	1.33754	3.45805	-8.36885	5.03131e-16	2.23237e-15	25.2389
MAGEA3	1.33701	1.27589	-3.66842	0.000268297	0.000481732	-1.02562
RSPH1	1.33675	6.299	-6.61568	8.93659e-11	2.78547e-10	13.3627
FGF5	1.33539	1.49191	-6.9197	1.28956e-11	4.25551e-11	15.2581
ASCL2	1.33496	5.01166	-6.0948	2.08915e-09	5.84907e-09	10.285
C19orf33	1.3338	6.7902	-4.40532	1.27487e-05	2.62068e-05	1.86008
SYNGR4	1.33309	1.6242	-9.20693	7.40625e-19	3.94233e-18	31.6751
CHST6	1.33295	4.95267	-6.42811	2.84853e-10	8.56257e-10	12.2294
BRCA2	1.33098	7.37915	-10.155	2.75352e-22	1.8187e-21	39.4856
FSIP1	1.32697	6.7162	-3.95964	8.51377e-05	0.000161084	0.0554841
FCGR1B	1.32601	6.54702	-10.5328	1.02602e-23	7.37356e-23	42.7433
MKRN3	1.32504	2.66834	-4.24769	2.54459e-05	5.07555e-05	1.20128
TIGIT	1.32384	5.49073	-5.67786	2.23204e-08	5.78953e-08	7.98018
CRABP2	1.32335	12.3491	-6.35107	4.54983e-10	1.34827e-09	11.772
H2AFZ	1.32293	11.6459	-16.0827	8.08092e-48	2.10178e-46	97.8727
PPP1R14B	1.32174	9.94509	-12.3189	6.75193e-31	7.3153e-30	59.1428
CENPL	1.321	7.62997	-15.3721	1.76637e-44	3.87155e-43	90.2233
SNRNP25	1.32005	9.20286	-15.8344	1.2041e-46	2.95676e-45	95.1853
CCR4	1.32	4.63679	-6.36534	4.17312e-10	1.24007e-09	11.8564
CYP4F3	1.31998	2.10507	-5.54114	4.70774e-08	1.1896e-07	7.25587
CDH11	1.31867	10.9613	-9.10233	1.71266e-18	8.94967e-18	30.8469
FKBP4	1.31856	12.6689	-13.2523	6.76256e-35	9.16842e-34	68.2878
CBX4	1.31651	9.40614	-12.5903	4.8149e-32	5.50182e-31	61.7645
APLP1	1.31641	6.50384	-5.55267	4.42332e-08	1.12021e-07	7.31632
GATA4	1.31543	1.63832	-4.26336	2.3779e-05	4.7558e-05	1.26576
FBXL6	1.315	8.50976	-13.0368	5.84369e-34	7.49706e-33	66.1456
SOX11	1.31393	6.00954	-4.40207	1.29339e-05	2.65748e-05	1.84631
RCOR2	1.31344	5.36723	-6.03215	3.00885e-09	8.3207e-09	9.9295
OLFML2B	1.31278	10.0833	-10.2981	7.99454e-23	5.48106e-22	40.71
MYBL1	1.31175	7.65341	-6.67737	6.0681e-11	1.91436e-10	13.7415
SLC44A4	1.30825	9.62045	-3.61535	0.000328097	0.000583479	-1.21419
OAS2	1.30824	10.6903	-7.68473	7.30157e-14	2.8155e-13	20.3377
OSM	1.308	4.96148	-7.30889	9.78239e-13	3.47503e-12	17.7877
ABCA12	1.30043	6.99559	-3.5317	0.000448301	0.000786235	-1.5061
OAS3	1.30008	11.1505	-9.24025	5.66274e-19	3.03473e-18	31.9403
LSR	1.29963	10.9668	-12.8757	2.89773e-33	3.58348e-32	64.5553
ACOT7	1.2953	8.82635	-12.3811	3.69515e-31	4.05214e-30	59.7412
MAZ	1.29507	11.957	-18.5888	5.86284e-60	3.15013e-58	125.691
FBXL16	1.29253	8.52916	-6.00124	3.59797e-09	9.89876e-09	9.75533
DNASE1L2	1.29051	3.48084	-8.32436	7.02262e-16	3.08794e-15	24.9102
IGFALS	1.28987	4.24741	-4.58758	5.58305e-06	1.18242e-05	2.64967
TMPRSS6	1.28825	4.9372	-3.85157	0.00013148	0.000243733	-0.354843
FOXD2	1.28652	4.83982	-7.67452	7.84576e-14	3.02058e-13	20.267
WDR34	1.28527	10.3267	-14.7084	2.05562e-41	3.8846e-40	83.2029
AKR7A3	1.28407	7.34566	-3.78885	0.000168407	0.000308255	-0.588032
TMEM206	1.28313	7.89462	-15.0004	9.35354e-43	1.90177e-41	86.2755
IGFL3	1.28091	1.2545	-6.97223	9.16459e-12	3.05249e-11	15.5928
AGMAT	1.28056	4.91999	-9.91291	2.17417e-21	1.35117e-20	37.4405
C19orf45	1.28037	2.55596	-8.00674	7.29983e-15	3.00767e-14	22.6037
SAC3D1	1.27996	7.35167	-11.9223	3.02496e-29	2.99352e-28	55.3691
ZNF296	1.27902	5.99757	-9.53586	5.07913e-20	2.91353e-19	34.3237
ARNT2	1.27812	9.59142	-6.49966	1.83646e-10	5.59093e-10	12.6584
NAT14	1.27674	7.7255	-11.485	1.84242e-27	1.63707e-26	51.2924
RAB25	1.27597	10.8427	-12.1315	4.10713e-30	4.23563e-29	57.3507
PYCARD	1.2749	8.79512	-7.93535	1.2239e-14	4.96159e-14	22.095
WNT7B	1.27366	7.95812	-6.04672	2.76485e-09	7.66326e-09	10.0119
OIT3	1.27314	1.8879	-8.54584	1.31838e-16	6.075e-16	26.5595
KMO	1.27282	6.89829	-5.41154	9.41784e-08	2.32431e-07	6.5838
BOP1	1.27256	7.62202	-6.8424	2.12362e-11	6.92653e-11	14.7694
CDK5	1.27164	8.1945	-16.4395	1.6259e-49	4.64464e-48	101.759
TSPAN13	1.26717	12.1374	-9.51648	5.9585e-20	3.39976e-19	34.1658
NELL2	1.26684	7.71483	-4.1825	3.36557e-05	6.63589e-05	0.935331
RHOF	1.26656	6.42856	-6.43643	2.70737e-10	8.14682e-10	12.2791
MBOAT7	1.26632	10.6564	-13.8997	9.36081e-38	1.45991e-36	74.8288
RELL2	1.26491	5.21103	-8.97127	4.849e-18	2.4524e-17	29.819
HIST1H2AC	1.26435	10.5505	-8.15502	2.4679e-15	1.04547e-14	23.6718
TUFT1	1.26178	10.0375	-13.8575	1.4434e-37	2.23284e-36	74.3984
CKAP2	1.26058	9.43577	-13.083	3.685e-34	4.78855e-33	66.6036
CHST1	1.26047	7.29294	-6.16969	1.34534e-09	3.82723e-09	10.7141
FOXD3	1.25966	1.98318	-5.77827	1.27788e-08	3.36397e-08	8.52209
IL11	1.25821	3.62825	-8.63444	6.69128e-17	3.14474e-16	27.2285
TPM3	1.2579	13.2417	-21.6435	3.21642e-75	5.30091e-73	160.678
TMEM8A	1.25789	10.1328	-15.6852	6.05935e-46	1.43847e-44	93.5779
KIAA1257	1.25782	4.94443	-6.28368	6.82711e-10	1.98877e-09	11.3759
NACC1	1.25722	10.6678	-18.0988	1.50649e-57	7.055e-56	120.168
WNT2	1.25672	7.21957	-6.80782	2.65069e-11	8.59169e-11	14.5522
NOTUM	1.25642	2.18915	-6.41653	3.05708e-10	9.17017e-10	12.1604
MARCKSL1	1.2555	12.4975	-14.8123	6.87008e-42	1.33205e-40	84.2927
P2RY6	1.25207	6.00842	-8.02582	6.35421e-15	2.62436e-14	22.7403
RSAD2	1.25181	8.94165	-6.58438	1.08648e-10	3.36871e-10	13.1716
FANCD2	1.25173	8.65705	-11.9167	3.18882e-29	3.1466e-28	55.3167
SLC2A6	1.25118	6.24083	-7.88026	1.81921e-14	7.29044e-14	21.7048
C14orf80	1.25111	6.87898	-9.96214	1.43205e-21	9.00083e-21	37.8537
SPAG4	1.24845	5.5276	-8.1071	3.50958e-15	1.47401e-14	23.3249
AMH	1.24732	2.58227	-5.84674	8.696e-09	2.32309e-08	8.89638
SPINT2	1.24703	13.0609	-14.4942	1.95378e-40	3.50657e-39	80.964
FGD3	1.24599	8.95059	-6.07569	2.3358e-09	6.50985e-09	10.1762
IL19	1.24558	1.28422	-5.75839	1.42799e-08	3.74417e-08	8.41413
C21orf58	1.24373	6.50459	-10.9211	3.2204e-25	2.53549e-24	46.1729
N4BP3	1.24152	8.76507	-9.10554	1.66932e-18	8.73653e-18	30.8722
SLC39A11	1.24047	10.41	-10.8829	4.54317e-25	3.52671e-24	45.8318
CHEK1	1.24005	7.59522	-10.5086	1.26931e-23	9.0801e-23	42.5325
HIST2H2AC	1.23989	2.68473	-9.70522	1.24616e-20	7.41896e-20	35.7132
SLC38A5	1.2393	6.61591	-6.5286	1.5359e-10	4.70432e-10	12.8331
PCNA	1.23924	11.085	-14.7468	1.37221e-41	2.61329e-40	83.6047
LSM4	1.23868	10.4504	-16.2056	2.11104e-48	5.68025e-47	99.2082
CENPP	1.23642	6.79568	-10.4345	2.43151e-23	1.71014e-22	41.8887
MRPS34	1.2363	9.83835	-13.5562	3.13491e-36	4.54588e-35	71.3394
SLC35A2	1.23598	9.90908	-20.4475	3.30474e-69	3.27418e-67	146.894
TTC39A	1.23549	10.6836	-7.21018	1.9015e-12	6.62031e-12	17.1353
NPNT	1.23455	11.1192	-5.81206	1.0573e-08	2.79878e-08	8.70631
EFNA3	1.23363	8.21032	-7.35403	7.20138e-13	2.58658e-12	18.0884
FOXH1	1.23354	2.46578	-8.23932	1.32322e-15	5.72582e-15	24.2859
GPR37L1	1.23234	3.05907	-5.96424	4.45247e-09	1.21676e-08	9.54782
KLHL35	1.23124	5.79406	-7.0496	5.52122e-12	1.86507e-11	16.0896
RASSF7	1.22997	8.4417	-10.2935	8.31403e-23	5.68645e-22	40.6712
ATP6V0B	1.22963	11.1217	-16.3044	7.16299e-49	1.96753e-47	100.284
IDH2	1.22667	11.5497	-10.8902	4.25134e-25	3.31218e-24	45.8976
TMEM97	1.22665	9.34002	-9.65599	1.87813e-20	1.10433e-19	35.3075
HIST3H2A	1.22638	5.21821	-5.35766	1.25135e-07	3.06315e-07	6.30861
GGCT	1.22634	10.8463	-13.7529	4.21679e-37	6.40743e-36	73.3329
HN1L	1.22617	12.1834	-16.771	4.20956e-51	1.29537e-49	105.395
ATG9B	1.22609	4.66588	-7.54531	1.9347e-13	7.25144e-13	19.3797
MBOAT2	1.22607	9.60778	-9.81014	5.17437e-21	3.14387e-20	36.5827
RUSC1	1.22598	10.0768	-16.4201	2.01214e-49	5.70993e-48	101.547
MFSD3	1.22501	8.08725	-10.378	3.98437e-23	2.76486e-22	41.3996
KPNA7	1.2242	1.84793	-6.28472	6.78445e-10	1.97764e-09	11.382
HMGA1	1.22367	10.5269	-10.547	9.0487e-24	6.52756e-23	42.8677
SOX2	1.22361	2.08068	-4.24306	2.59603e-05	5.17394e-05	1.18223
CREB3L4	1.22151	10.7465	-9.28724	3.87345e-19	2.10498e-18	32.3155
CHTF18	1.22147	7.66124	-9.73634	9.60811e-21	5.75613e-20	35.9704
CCDC151	1.22123	3.52961	-5.69434	2.03804e-08	5.29513e-08	8.0685
TMEM79	1.22037	8.62315	-11.3884	4.51133e-27	3.91714e-26	50.4043
DONSON	1.22028	8.09849	-11.9499	2.32731e-29	2.31381e-28	55.6293
FLVCR1	1.22014	7.79531	-12.416	2.63522e-31	2.91404e-30	60.0768
GDF15	1.21989	7.10923	-4.61555	4.90622e-06	1.04411e-05	2.77348
PKIB	1.21951	9.05228	-5.90781	6.14891e-09	1.6626e-08	9.23359
CHPF	1.21907	10.9511	-12.9329	1.64295e-33	2.05699e-32	65.1189
NKX2-2	1.21906	1.37589	-4.2179	2.89272e-05	5.73531e-05	1.07928
BIK	1.21846	7.19571	-7.53039	2.14562e-13	8.01916e-13	19.278
SLC25A22	1.21784	8.92748	-13.6732	9.52401e-37	1.41703e-35	72.5233
SLC2A1	1.21728	10.7904	-10.6661	3.15385e-24	2.33912e-23	43.9119
IL9R	1.21619	2.44706	-8.10841	3.47591e-15	1.46022e-14	23.3344
COMTD1	1.21603	6.38326	-9.62056	2.52075e-20	1.46958e-19	35.0165
CATSPER1	1.21506	1.88046	-8.82332	1.54956e-17	7.57111e-17	28.6721
MLLT11	1.21007	7.40332	-9.86356	3.29959e-21	2.0307e-20	37.0278
IL17REL	1.20993	2.23628	-5.84757	8.65525e-09	2.31256e-08	8.90095
ARSI	1.20985	5.85422	-6.86145	1.87874e-11	6.14888e-11	14.8894
CYP2B6	1.20907	1.70122	-5.47346	6.77351e-08	1.69165e-07	6.90314
SLCO5A1	1.20862	2.66383	-6.17617	1.29483e-09	3.6903e-09	10.7514
TMEM63C	1.20629	8.34666	-4.96563	9.20543e-07	2.08485e-06	4.38135
GPSM2	1.20243	9.07079	-11.4384	2.84082e-27	2.49573e-26	50.8629
CHRNA9	1.20207	1.43743	-4.77686	2.29869e-06	5.0293e-06	3.50095
PRR15L	1.20137	9.24258	-7.47438	3.1596e-13	1.1674e-12	18.8977
SLC22A18AS	1.20114	3.59761	-7.12968	3.25246e-12	1.1174e-11	16.6086
STX1A	1.19724	6.67494	-10.3929	3.49849e-23	2.43262e-22	41.5284
PRSS8	1.19218	11.5514	-9.16924	1.00262e-18	5.31217e-18	31.3758
SERPINA9	1.19159	1.79001	-6.62256	8.56053e-11	2.67312e-10	13.4048
FAM110A	1.19097	8.80381	-12.3128	7.161e-31	7.74871e-30	59.0844
SDF2L1	1.18986	7.9091	-10.7432	1.58828e-24	1.19557e-23	44.5915
CENPO	1.18766	7.03036	-12.7472	1.031e-32	1.22974e-31	63.2949
LRRC56	1.18589	6.49763	-6.91036	1.37002e-11	4.51754e-11	15.1987
CCDC87	1.18557	4.9598	-7.89883	1.59207e-14	6.40866e-14	21.8361
LRRC59	1.18373	11.8641	-12.9599	1.25656e-33	1.58015e-32	65.3852
ADAMTS6	1.18349	5.74746	-8.53703	1.40989e-16	6.48567e-16	26.4933
ROGDI	1.18282	9.17876	-11.5212	1.31516e-27	1.17467e-26	51.6267
SSX2IP	1.18225	9.35201	-15.0491	5.56857e-43	1.14306e-41	86.7913
2019-03-10	1.18163	2.05177	-6.57536	1.14919e-10	3.55478e-10	13.1168
MAPK15	1.18028	5.67469	-4.22432	2.81404e-05	5.5909e-05	1.10551
RABIF	1.17967	8.87027	-19.0009	5.3813e-62	3.24773e-60	130.361
MSR1	1.17873	9.58944	-8.9346	6.47523e-18	3.24424e-17	29.5335
NOD2	1.17816	7.18971	-7.4641	3.39132e-13	1.24844e-12	18.8281
ENTPD7	1.17778	9.00967	-14.036	2.29545e-38	3.69774e-37	76.2258
PFKFB4	1.17745	7.68712	-13.1133	2.72403e-34	3.5723e-33	66.9037
TMED3	1.1767	11.4336	-14.6351	4.44821e-41	8.26923e-40	82.4353
PAX2	1.17643	3.29694	-4.19562	3.18225e-05	6.28964e-05	0.988569
KIF22	1.17603	10.2588	-15.2479	6.67964e-44	1.42046e-42	88.9003
F2RL2	1.17321	8.40537	-4.98179	8.49991e-07	1.93042e-06	4.45817
TMEM63B	1.17289	10.2974	-16.4466	1.50499e-49	4.32086e-48	101.836
C3orf36	1.17258	2.71803	-9.50276	6.67126e-20	3.79759e-19	34.0541
SBSN	1.17224	1.71908	-3.89939	0.000108617	0.000203153	-0.174622
MANEAL	1.17016	8.56813	-8.23205	1.39658e-15	6.03107e-15	24.2327
PPP4C	1.16883	10.8162	-16.8395	1.97267e-51	6.2383e-50	106.149
HSF2BP	1.16735	5.00073	-11.7675	1.3087e-28	1.23655e-27	53.9158
PHLDA2	1.16734	6.57901	-6.89589	1.50447e-11	4.95326e-11	15.107
ALPK2	1.16696	5.15168	-6.31523	5.64822e-10	1.65913e-09	11.5609
RND1	1.16495	7.61504	-6.00342	3.55293e-09	9.77641e-09	9.7676
SPAG1	1.16444	8.26172	-10.622	4.6624e-24	3.42389e-23	43.5246
EPHB2	1.16391	7.52321	-8.95281	5.60938e-18	2.82364e-17	29.6752
RAB19	1.16301	3.92566	-7.54033	2.00282e-13	7.50182e-13	19.3457
COL8A1	1.1618	8.94242	-6.32528	5.31641e-10	1.56758e-09	11.62
CCL20	1.16155	2.8947	-4.94795	1.00421e-06	2.26834e-06	4.29756
OAZ3	1.16014	5.77759	-8.46262	2.48108e-16	1.12472e-15	25.9359
CLDN9	1.15936	3.42219	-6.1634	1.39622e-09	3.96802e-09	10.6779
LGALS9B	1.15908	1.32156	-5.38657	1.07466e-07	2.64194e-07	6.45599
PODXL2	1.15846	9.09555	-7.55006	1.87205e-13	7.01966e-13	19.412
HSPB1	1.15834	12.3182	-7.59002	1.41769e-13	5.36086e-13	19.6853
LRRC45	1.15683	8.12219	-9.93463	1.8087e-21	1.12854e-20	37.6226
CLCN2	1.15436	6.90352	-11.733	1.81073e-28	1.7034e-27	53.5936
SLC6A9	1.15026	8.41382	-7.46877	3.28386e-13	1.2107e-12	18.8598
PLEK2	1.14884	6.96877	-9.55323	4.40107e-20	2.53135e-19	34.4654
P2RY11	1.14878	4.83703	-3.67166	0.000265009	0.000476127	-1.01405
CACNA1H	1.14874	7.57434	-4.20461	3.06227e-05	6.05599e-05	1.02511
LMNB2	1.14869	10.0478	-11.8514	5.92225e-29	5.73488e-28	54.7025
SMYD3	1.14746	8.5485	-10.0905	4.79031e-22	3.10185e-21	38.9375
TTC16	1.14593	3.07199	-6.85773	1.92428e-11	6.29551e-11	14.8659
APOBEC3A	1.1457	3.96113	-5.19436	2.91826e-07	6.91731e-07	5.48971
REEP4	1.14497	8.61761	-12.5014	1.14675e-31	1.28887e-30	60.9028
GPR143	1.14406	5.78984	-5.85557	8.2721e-09	2.2133e-08	8.94499
DSCC1	1.14383	7.37512	-9.0133	3.47698e-18	1.77314e-17	30.1475
RAB3A	1.14382	6.54376	-9.65063	1.96364e-20	1.15302e-19	35.2635
HOXB9	1.14326	4.20312	-5.85413	8.33993e-09	2.2304e-08	8.93705
INTS7	1.14319	9.66203	-14.8939	2.89616e-42	5.71233e-41	85.1516
SMC1B	1.14272	3.20736	-4.15958	3.70994e-05	7.29057e-05	0.842767
HIST1H3J	1.14151	1.07952	-10.0696	5.73001e-22	3.68665e-21	38.7602
SYN1	1.14005	4.57767	-5.74891	1.50555e-08	3.9373e-08	8.36273
LBX2	1.13894	3.00634	-8.31569	7.49248e-16	3.29032e-15	24.8464
OSCAR	1.13863	6.17651	-9.2936	3.67901e-19	2.00312e-18	32.3664
CELF3	1.13784	1.20514	-5.29835	1.7062e-07	4.1288e-07	6.00859
CBX8	1.13761	6.88613	-10.3317	5.96924e-23	4.12219e-22	40.9993
DNAJC1	1.13718	10.118	-9.77176	7.1421e-21	4.30889e-20	36.2638
OAS1	1.13667	9.71451	-6.8676	1.80587e-11	5.91829e-11	14.9281
ZNF467	1.13429	8.01021	-8.53949	1.38374e-16	6.3722e-16	26.5118
ULBP2	1.1315	3.915	-6.04109	2.85684e-09	7.90543e-09	9.98001
CDK5R1	1.13123	6.72694	-9.74656	8.82042e-21	5.29534e-20	36.0551
AIM2	1.13046	4.13815	-5.05325	5.95868e-07	1.37274e-06	4.80059
FUT7	1.1299	2.98118	-6.72515	4.48697e-11	1.43029e-10	14.0369
NXPH4	1.1299	5.19828	-4.91106	1.20301e-06	2.69723e-06	4.12365
TIMM17A	1.12783	10.4499	-17.9	1.41727e-56	6.19695e-55	117.936
MFSD2B	1.12759	3.99767	-9.10302	1.70328e-18	8.90341e-18	30.8523
PARP1	1.12685	12.3431	-16.6702	1.28253e-50	3.85659e-49	104.286
EXOSC4	1.12491	8.29133	-10.9767	1.9485e-25	1.55554e-24	46.6708
FCGR3A	1.12403	10.4792	-8.2255	1.46606e-15	6.31552e-15	24.1849
FCRLB	1.12402	4.82944	-4.61845	4.84079e-06	1.03083e-05	2.78635
CACNB3	1.123	9.2522	-11.5836	7.34907e-28	6.66471e-27	52.204
MC1R	1.12144	6.39891	-9.55452	4.35449e-20	2.50563e-19	34.4759
MRPS30	1.1211	9.78635	-6.5206	1.61377e-10	4.93311e-10	12.7848
SLC23A1	1.12074	3.60879	-5.34346	1.34809e-07	3.29197e-07	6.23653
YDJC	1.11995	7.89928	-11.9463	2.40708e-29	2.39173e-28	55.5958
HIST1H4D	1.11742	1.27268	-9.34221	2.47988e-19	1.36541e-18	32.7562
DLX4	1.1172	3.94458	-5.6251	2.98245e-08	7.64686e-08	7.69878
FZD2	1.11588	6.74508	-9.49077	7.36246e-20	4.17718e-19	33.9567
EZR	1.1151	12.6829	-14.3923	5.672e-40	1.00122e-38	79.9044
CENPN	1.11484	8.14591	-9.5225	5.67025e-20	3.23852e-19	34.2149
TRIM11	1.11302	9.18374	-15.2972	3.93963e-44	8.51517e-43	89.4254
C1orf112	1.11262	8.07085	-12.1853	2.44924e-30	2.56444e-29	57.8638
EPSTI1	1.1126	7.80129	-7.00102	7.59349e-12	2.54303e-11	15.7771
TTYH3	1.11197	10.6611	-10.6351	4.15184e-24	3.05681e-23	43.6395
MRPL13	1.11126	9.68802	-12.785	7.10389e-33	8.59892e-32	63.6647
CCT3	1.1102	12.9236	-17.1158	9.19095e-53	3.16968e-51	109.201
BRI3BP	1.10996	6.62668	-12.0876	6.25149e-30	6.38181e-29	56.9337
ZG16B	1.10971	9.44603	-4.75713	2.52504e-06	5.50556e-06	3.41073
CDKN2D	1.1089	7.32692	-10.0577	6.34451e-22	4.06219e-21	38.6594
NKX6-1	1.10865	2.57606	-5.43904	8.13848e-08	2.01901e-07	6.72524
REM2	1.10848	4.18455	-7.10831	3.74742e-12	1.28103e-11	16.4696
STXBP2	1.10743	10.3152	-12.6723	2.15457e-32	2.51562e-31	62.5629
KCNK6	1.10731	8.72359	-8.01869	6.69258e-15	2.76278e-14	22.6892
AQP9	1.10725	4.96092	-3.90154	0.00010768	0.000201533	-0.166444
FXYD3	1.10602	11.0682	-6.92934	1.21142e-11	4.00239e-11	15.3193
STRBP	1.10556	10.2672	-17.2991	1.19295e-53	4.34121e-52	111.233
TCL1B	1.10514	1.25367	-4.60493	5.15335e-06	1.09494e-05	2.72639
DLX5	1.1045	3.77446	-5.65027	2.59808e-08	6.69942e-08	7.83272
CHST11	1.10405	7.17804	-9.11689	1.5246e-18	8.0011e-18	30.9618
HDGF	1.10132	12.8263	-15.8797	7.36155e-47	1.82337e-45	95.6748
CHAF1B	1.10038	8.26389	-10.5398	9.64161e-24	6.94066e-23	42.8049
KDELR3	1.10014	9.3209	-8.42669	3.25527e-16	1.46445e-15	25.6682
HIST1H1E	1.10006	2.47203	-7.8118	2.96835e-14	1.17554e-13	21.2231
ALDOA	1.09911	14.562	-11.3163	8.77945e-27	7.50148e-26	49.744
FOXD4	1.09906	3.30116	-7.94647	1.12948e-14	4.58968e-14	22.174
DCTPP1	1.09894	9.88638	-15.4726	5.99905e-45	1.3441e-43	91.2974
PGP	1.09779	8.40659	-13.6173	1.68396e-36	2.47327e-35	71.957
RHCE	1.0974	3.7608	-6.30891	5.867e-10	1.72075e-09	11.5238
IL12B	1.09698	1.84886	-5.93838	5.16413e-09	1.40519e-08	9.40347
ABHD11	1.09633	9.64009	-10.7609	1.35533e-24	1.02835e-23	44.7487
DOPEY2	1.09625	10.5526	-11.1533	3.91508e-26	3.23551e-25	48.2617
THY1	1.09619	11.445	-9.09107	1.87368e-18	9.74654e-18	30.7581
CELSR1	1.09613	11.5421	-6.43823	2.67772e-10	8.06042e-10	12.2899
MRPL14	1.0944	9.39706	-13.7085	6.64293e-37	9.99648e-36	72.8813
CORO2A	1.09391	9.80886	-8.51107	1.71795e-16	7.87527e-16	26.2984
GOLT1A	1.09354	6.42921	-7.1148	3.58984e-12	1.22888e-11	16.5118
DCAF13	1.09346	10.2696	-12.5552	6.78178e-32	7.7082e-31	61.4244
SLC20A1	1.09259	10.5604	-17.1829	4.35493e-53	1.53904e-51	109.944
H2AFY	1.09253	12.0502	-19.3977	5.77232e-64	3.81998e-62	134.876
CYB561	1.09152	11.7112	-11.3249	8.10709e-27	6.95125e-26	49.823
PAX9	1.09119	6.53852	-4.59779	5.3263e-06	1.12986e-05	2.69477
NUDT16L1	1.09099	9.13177	-12.9588	1.27068e-33	1.59557e-32	65.3741
SEPHS2	1.08994	11.3598	-12.7699	8.24163e-33	9.92703e-32	63.5172
PRSS22	1.08879	6.94794	-7.59377	1.38102e-13	5.23223e-13	19.7111
KIAA0319	1.08858	3.36593	-4.18397	3.34455e-05	6.59596e-05	0.941286
FOXS1	1.08739	5.33387	-8.96836	4.96157e-18	2.50638e-17	29.7964
LTB	1.08467	5.4513	-4.24113	2.61771e-05	5.21472e-05	1.17432
ILDR2	1.08451	1.80099	-7.9846	8.57174e-15	3.5123e-14	22.4456
TAP1	1.08322	11.1287	-7.50631	2.53478e-13	9.43045e-13	19.1142
TLE6	1.0796	5.13411	-5.37172	1.16213e-07	2.85045e-07	6.38022
CAPN13	1.07952	8.2504	-3.63884	0.000300233	0.000536264	-1.13106
PIK3R2	1.07942	10.8731	-15.2561	6.11658e-44	1.30396e-42	88.9879
NR2F6	1.07941	9.95312	-14.4581	2.85124e-40	5.09596e-39	80.5882
FCRL4	1.07874	1.17129	-7.62572	1.10478e-13	4.21173e-13	19.9305
EIF3C	1.07716	7.95974	-5.21832	2.58086e-07	6.15843e-07	5.60843
CLDN7	1.07659	10.5847	-9.41793	1.33759e-19	7.4703e-19	33.3664
SERPINE1	1.07574	10.0023	-6.58981	1.0503e-10	3.26067e-10	13.2047
SEMA7A	1.07461	7.0899	-8.29069	9.03017e-16	3.94538e-15	24.6624
RPUSD1	1.07411	8.65155	-12.7802	7.44743e-33	8.99098e-32	63.6178
PCSK1	1.0735	3.99381	-3.32287	0.000951473	0.00161596	-2.20632
WDHD1	1.07344	8.0883	-11.1775	3.13935e-26	2.60826e-25	48.4806
SERINC2	1.07292	11.4092	-8.98781	4.25462e-18	2.15688e-17	29.9482
ATP6AP1	1.07267	12.3177	-15.1931	1.19988e-43	2.51111e-42	88.3178
AP1S1	1.07202	9.68724	-14.8974	2.79092e-42	5.51746e-41	85.1884
NVL	1.07194	9.68609	-12.8085	5.6296e-33	6.84336e-32	63.8957
FAM183A	1.07092	2.41759	-5.33532	1.40686e-07	3.43009e-07	6.19524
PLAU	1.0708	10.5013	-7.06986	4.83162e-12	1.63923e-11	16.2204
RMI1	1.06919	8.68899	-13.6597	1.09331e-36	1.62386e-35	72.3862
CASKIN1	1.06914	4.38009	-5.47368	6.76562e-08	1.68993e-07	6.90427
USP18	1.06799	8.72948	-8.5805	1.01175e-16	4.70213e-16	26.8206
BASP1	1.06669	9.10202	-8.37103	4.94992e-16	2.19797e-15	25.255
APOO	1.0664	8.15462	-14.0469	2.05268e-38	3.32227e-37	76.337
TTLL12	1.06595	10.6361	-9.36259	2.101e-19	1.16053e-18	32.9201
ADAMTS7	1.06558	6.98122	-8.14691	2.61972e-15	1.10787e-14	23.613
CTSD	1.06513	14.0824	-8.65091	5.8954e-17	2.7852e-16	27.3534
MAG	1.06486	2.65131	-4.0851	5.07579e-05	9.84374e-05	0.545244
GAD1	1.06465	2.76689	-3.88408	0.000115493	0.000215215	-0.232556
HIST1H2BN	1.06443	3.43096	-7.41941	4.60903e-13	1.68011e-12	18.5267
NOX4	1.06401	7.30991	-6.51348	1.6863e-10	5.14658e-10	12.7418
TCTEX1D2	1.06384	7.17519	-11.54	1.10436e-27	9.90511e-27	51.8
SIM2	1.06307	6.26596	-4.82408	1.83352e-06	4.0472e-06	3.71824
METTL11B	1.06293	0.958189	-8.59233	9.2422e-17	4.30699e-16	26.9099
FLAD1	1.06277	9.99321	-14.9898	1.04646e-42	2.12013e-41	86.1639
C1orf127	1.06275	2.72837	-6.7518	3.78886e-11	1.21635e-10	14.2024
SLC17A9	1.06158	6.20213	-5.59279	3.55761e-08	9.08213e-08	7.52763
MAPK13	1.05947	10.0398	-12.8733	2.96659e-33	3.66336e-32	64.532
NME1-NME2	1.05926	6.32634	-7.11905	3.49e-12	1.19542e-11	16.5395
DNMT3B	1.05728	6.86669	-7.45754	3.5478e-13	1.30492e-12	18.7838
C1orf194	1.05719	1.74894	-5.17659	3.19566e-07	7.53861e-07	5.40198
CLIC3	1.05656	5.01679	-4.71015	3.15365e-06	6.81463e-06	3.1973
WDR76	1.05555	7.83361	-10.7748	1.19713e-24	9.10732e-24	44.8717
FAM25A	1.05438	1.18122	-4.28921	2.12545e-05	4.27233e-05	1.37264
HSD17B7	1.05408	8.35836	-11.6699	3.27699e-28	3.02791e-27	53.0052
ZNF668	1.05285	7.88371	-14.5043	1.75702e-40	3.16337e-39	81.0695
AGR2	1.05002	11.3553	-2.58081	0.0101202	0.0151812	-4.36067
SLC37A1	1.04743	9.17601	-12.0606	8.09349e-30	8.21329e-29	56.6774
DBF4	1.04739	8.08892	-11.4039	3.91046e-27	3.40576e-26	50.546
XKRX	1.04697	3.43179	-7.42958	4.29856e-13	1.5686e-12	18.5952
PSENEN	1.04678	10.3468	-13.9203	7.56923e-38	1.18481e-36	75.0399
HSPE1	1.04551	10.621	-13.3189	3.45811e-35	4.74176e-34	68.9541
FPR3	1.04375	8.88573	-6.50391	1.78894e-10	5.44821e-10	12.684
HMGA2	1.04221	2.4997	-6.17999	1.26589e-09	3.61201e-09	10.7734
MICB	1.04205	7.11439	-6.73141	4.31236e-11	1.37694e-10	14.0757
E2F5	1.04073	7.74117	-8.66317	5.36441e-17	2.54627e-16	27.4466
RUFY4	1.04071	2.89078	-5.12048	4.24963e-07	9.90328e-07	5.12674
HEYL	1.03632	8.30881	-9.28343	3.99485e-19	2.16683e-18	32.285
TIGD5	1.03578	7.11469	-9.68758	1.44374e-20	8.56548e-20	35.5677
IER3	1.03556	10.7179	-6.87722	1.69724e-11	5.57185e-11	14.9889
PSME2	1.03489	10.9073	-10.9667	2.1339e-25	1.70037e-24	46.5808
NANS	1.03284	10.1764	-13.3583	2.32466e-35	3.23414e-34	69.3487
PKP3	1.03144	9.88488	-9.57783	3.59128e-20	2.07534e-19	34.6665
TAS1R3	1.02789	3.45948	-5.34131	1.36342e-07	3.32751e-07	6.22559
FUT2	1.02784	6.84006	-5.05778	5.82516e-07	1.34306e-06	4.82245
KIAA1644	1.0275	5.58975	-5.0764	5.30613e-07	1.22772e-06	4.91248
C20orf24	1.0271	10.4188	-12.7297	1.22484e-32	1.45185e-31	63.1238
HS3ST3A1	1.02702	4.42448	-6.93546	1.16427e-11	3.8502e-11	15.3582
HYAL3	1.02693	6.25108	-9.25977	4.83691e-19	2.60461e-18	32.096
MST1R	1.02541	8.10142	-6.08256	2.24408e-09	6.26851e-09	10.2152
EGLN3	1.02447	9.11343	-5.59269	3.55958e-08	9.08446e-08	7.52709
RHEBL1	1.02409	4.26393	-7.99846	7.7522e-15	3.18487e-14	22.5445
CXCR5	1.02396	3.80004	-4.56619	6.16017e-06	1.30079e-05	2.55547
CACNA1E	1.02329	2.24014	-6.79106	2.95054e-11	9.54013e-11	14.4473
SLC27A2	1.02243	7.04631	-3.60893	0.000336124	0.000597012	-1.23682
NECAB3	1.02224	9.01971	-8.42343	3.33637e-16	1.50014e-15	25.6439
FOXD4L1	1.022	2.33213	-8.84161	1.34328e-17	6.59709e-17	28.8131
IL24	1.02053	2.83723	-4.92435	1.12737e-06	2.53618e-06	4.18616
CDH7	1.0192	1.76624	-3.97234	8.08467e-05	0.000153287	0.104389
TIMM17B	1.01891	9.16321	-13.9874	3.79305e-38	6.04771e-37	75.7266
BCL9	1.01786	10.2087	-12.7093	1.49758e-32	1.76902e-31	62.9241
FSTL4	1.01741	5.25545	-4.19195	3.23264e-05	6.3863e-05	0.973633
LPCAT1	1.0173	10.6273	-10.6421	3.90418e-24	2.87694e-23	43.7004
HIST1H3B	1.01663	0.9799	-7.81582	2.88462e-14	1.14371e-13	21.2512
GTF2IRD1	1.01585	9.27187	-15.4249	1.00182e-44	2.23003e-43	90.7873
TDRKH	1.0158	8.90997	-11.2626	1.43896e-26	1.21617e-25	49.2541
TRAIP	1.01438	6.54589	-11.0219	1.29459e-25	1.04469e-24	47.0761
PPP1CA	1.01425	11.4947	-13.6039	1.92923e-36	2.82866e-35	71.8218
BOLA2	1.01369	9.73248	-13.7043	6.92875e-37	1.04174e-35	72.8394
HNRNPAB	1.01319	11.5612	-15.6886	5.83791e-46	1.38975e-44	93.6149
ARPC1B	1.01307	11.0212	-10.4118	2.96756e-23	2.07185e-22	41.6914
SRXN1	1.0126	10.1132	-11.8777	4.61783e-29	4.50225e-28	54.9493
SYNGR2	1.01244	12.0619	-12.7359	1.1525e-32	1.36989e-31	63.1842
S100A11	1.01225	12.9037	-9.04549	2.69318e-18	1.38373e-17	30.3998
GPR137C	1.01198	5.88432	-7.86667	2.00542e-14	8.02167e-14	21.6089
FBXL19	1.01133	8.76421	-12.16	3.12378e-30	3.25283e-29	57.6223
ZWILCH	1.01018	8.80814	-14.168	5.85613e-39	9.7356e-38	77.5837
PDIA4	1.00918	12.1014	-13.3757	1.95017e-35	2.71535e-34	69.5232
CABLES2	1.00899	8.36789	-11.2414	1.74786e-26	1.46854e-25	49.0612
GOLM1	1.00885	12.0106	-7.48411	2.95447e-13	1.09325e-12	18.9636
DRD4	1.00644	2.47499	-6.40368	3.30622e-10	9.89153e-10	12.0839
LYZ	1.00573	11.0762	-4.72991	2.87276e-06	6.22412e-06	3.28685
TUBB8	1.00546	2.90592	-6.9429	1.10934e-11	3.67563e-11	15.4056
PSMC3IP	1.00465	6.35538	-8.44001	2.94385e-16	1.32993e-15	25.7673
DHCR7	1.00422	10.4144	-7.52854	2.17335e-13	8.11749e-13	19.2654
MMP14	1.00407	12.6348	-7.53323	2.10389e-13	7.86836e-13	19.2973
MRPS12	1.00374	8.74803	-12.4297	2.30503e-31	2.55386e-30	60.2097
STAT1	1.00353	12.6659	-7.88504	1.75787e-14	7.05124e-14	21.7386
VOPP1	1.00271	10.2274	-11.4442	2.69096e-27	2.36771e-26	50.9167
SDSL	1.00192	7.67203	-9.49485	7.11934e-20	4.04192e-19	33.9899
IFI27	1.0017	10.7331	-4.55925	6.35934e-06	1.33971e-05	2.52501
MAGEA12	1.00165	0.928931	-3.56196	0.000400716	0.000706249	-1.40126
PPM1E	1.00083	4.67432	-4.2816	2.19705e-05	4.41005e-05	1.34109
HOPX	1.0008	7.31681	-7.36493	6.68636e-13	2.40715e-12	18.1613
FAM171A2	1.00039	5.01791	-5.91169	6.01469e-09	1.62811e-08	9.25507
CBX6	-1.00019	8.55603	7.32867	8.555e-13	3.05358e-12	17.9193
GLYCTK	-1.00091	5.73924	10.3706	4.25131e-23	2.94533e-22	41.3354
CDH10	-1.00093	0.646012	6.91783	1.30533e-11	4.3067e-11	15.2461
OAF	-1.00096	9.01018	10.6229	4.62491e-24	3.39781e-23	43.5326
ADAMTS15	-1.00177	7.1436	3.44504	0.000615481	0.00106484	-1.80164
MGST1	-1.00183	11.4165	5.32157	1.51172e-07	3.67686e-07	6.12568
PHOSPHO1	-1.00429	2.24907	7.4299	4.28929e-13	1.56555e-12	18.5974
ZNF157	-1.00467	1.37137	8.59721	8.90261e-17	4.15213e-16	26.9468
DFNA5	-1.00503	7.35249	10.6089	5.23881e-24	3.83568e-23	43.4091
PDLIM1	-1.00507	11.1294	7.5591	1.7581e-13	6.59963e-13	19.4738
PPM1L	-1.0052	6.29984	7.88246	1.79066e-14	7.17772e-14	21.7204
GSTP1	-1.00549	10.9518	5.46512	7.08232e-08	1.7662e-07	6.85993
HOXB8	-1.00557	3.57412	5.11471	4.37534e-07	1.01865e-06	5.0986
MACROD2	-1.00617	6.23677	6.25191	8.25601e-10	2.38913e-09	11.1904
SVIL	-1.00733	10.8746	10.2515	1.19662e-22	8.11635e-22	40.3107
HADH	-1.00785	10.58	14.6622	3.34625e-41	6.26144e-40	82.7184
DIRC3	-1.00927	3.44723	6.73411	4.23934e-11	1.35463e-10	14.0925
GNE	-1.00929	9.34213	11.0585	9.28397e-26	7.53443e-25	47.4057
HIC1	-1.00944	6.90028	8.15654	2.44042e-15	1.03511e-14	23.6828
NAP1L6	-1.00952	1.57974	5.99782	3.66965e-09	1.00862e-08	9.73611
MOGAT2	-1.00985	3.63175	3.87383	0.000120324	0.000223682	-0.271222
PLAT	-1.01007	10.878	5.1461	3.73224e-07	8.74633e-07	5.25208
LEPROT	-1.01021	9.43941	11.3902	4.43692e-27	3.85448e-26	50.4207
SYN3	-1.01102	2.66012	6.77168	3.33859e-11	1.07725e-10	14.3263
CTNNA3	-1.01107	1.30573	8.14115	2.73314e-15	1.15526e-14	23.5712
DGKB	-1.013	1.51472	7.59065	1.41145e-13	5.34282e-13	19.6896
LAMC1	-1.01312	12.2944	10.1164	3.8352e-22	2.50516e-21	39.1576
DMKN	-1.01329	7.5525	4.29466	2.07566e-05	4.17568e-05	1.39522
IGSF9B	-1.01341	4.27687	4.21289	2.95555e-05	5.85305e-05	1.05884
C11orf63	-1.01377	7.07285	6.5306	1.51705e-10	4.64823e-10	12.8452
SYPL2	-1.01521	4.02307	8.69025	4.35332e-17	2.07497e-16	27.6526
ADAMTSL1	-1.01561	6.82358	7.02369	6.54549e-12	2.19894e-11	15.9227
AKR1E2	-1.01612	4.2655	4.84736	1.63895e-06	3.63364e-06	3.82611
ABHD1	-1.01625	3.99225	6.50943	1.72903e-10	5.27229e-10	12.7173
GLT8D2	-1.01739	8.49898	6.82401	2.38976e-11	7.76502e-11	14.6537
NAP1L3	-1.01775	6.0667	7.6538	9.07469e-14	3.47887e-13	20.1239
SUN2	-1.01827	11.3802	10.968	2.10778e-25	1.68034e-24	46.593
LRRC4C	-1.0189	6.1411	4.83337	1.75335e-06	3.8771e-06	3.76123
AKAP7	-1.01922	7.0127	10.9767	1.94795e-25	1.55554e-24	46.6711
LENG8	-1.0194	10.7569	12.0893	6.1503e-30	6.28225e-29	56.9499
ZNF704	-1.01942	8.28534	6.70953	4.95342e-11	1.57371e-10	13.9401
STC2	-1.01947	11.6703	3.61184	0.000332462	0.000590876	-1.22657
AADACL2	-1.01954	0.232206	15.2396	7.30239e-44	1.54905e-42	88.8117
INTU	-1.01955	6.92695	10.0903	4.80031e-22	3.10715e-21	38.9355
CEBPD	-1.01956	8.8466	7.32935	8.51556e-13	3.04013e-12	17.9238
ACER2	-1.01976	6.82037	6.72561	4.47383e-11	1.4269e-10	14.0398
BOK	-1.02077	9.56453	8.3276	6.85441e-16	3.01475e-15	24.9341
FRMD4A	-1.02142	9.53798	12.2341	1.53049e-30	1.62532e-29	58.3305
AKAP3	-1.02143	4.51597	6.80012	2.78456e-11	9.01538e-11	14.504
ANG	-1.02248	7.85209	8.45158	2.69723e-16	1.22012e-15	25.8536
DHRS9	-1.02296	4.47703	4.76083	2.48099e-06	5.41502e-06	3.42764
GTF2IRD2B	-1.02407	7.38582	9.79077	6.089e-21	3.68783e-20	36.4216
FTO	-1.02588	10.4435	11.4576	2.37607e-27	2.09603e-26	51.0401
RPS6KA5	-1.02678	7.91537	8.85877	1.17455e-17	5.80165e-17	28.9456
INSRR	-1.02714	2.03653	6.97942	8.74494e-12	2.91838e-11	15.6387
ACVR2A	-1.0278	8.41513	12.1409	3.75286e-30	3.8843e-29	57.4402
MTMR10	-1.02787	9.61171	14.7627	1.16031e-41	2.22209e-40	83.7715
ROCK2	-1.02887	10.0272	10.1471	2.94745e-22	1.94007e-21	39.4182
IQGAP2	-1.02899	9.88784	5.9808	4.04791e-09	1.10939e-08	9.64058
ATRNL1	-1.02964	5.1325	3.08813	0.00211798	0.00346097	-2.94442
SH3BP5	-1.03007	10.2465	10.9816	1.86467e-25	1.49209e-24	46.7144
GAB3	-1.03035	6.38203	9.16072	1.0735e-18	5.67895e-18	31.3083
OSBPL1A	-1.03098	10.4448	11.5399	1.10555e-27	9.91061e-27	51.799
SLC25A25	-1.03108	9.07102	10.6027	5.53349e-24	4.04108e-23	43.3549
C11orf70	-1.03193	4.48124	5.4133	9.33011e-08	2.30429e-07	6.59287
CASP10	-1.03292	7.67214	8.41867	3.45847e-16	1.55382e-15	25.6085
TOX	-1.03338	5.46949	5.17178	3.27504e-07	7.71285e-07	5.37828
SELE	-1.03359	6.83649	4.16028	3.6989e-05	7.2697e-05	0.845599
MAGEE2	-1.03364	1.47708	8.08909	4.00435e-15	1.67647e-14	23.195
EHHADH	-1.03382	7.94363	9.37798	1.8534e-19	1.0274e-18	33.044
F13A1	-1.03394	9.81134	5.04356	6.25426e-07	1.43774e-06	4.7539
SESN1	-1.03407	9.22728	10.6671	3.12568e-24	2.31922e-23	43.9208
ADAM11	-1.03466	3.01498	7.40989	4.91953e-13	1.78797e-12	18.4627
ATL1	-1.0349	8.0666	9.28245	4.02661e-19	2.18336e-18	32.2772
MAST4	-1.03503	9.19763	6.32621	5.28675e-10	1.55964e-09	11.6255
PHGDH	-1.03508	9.70697	4.92855	1.10444e-06	2.4859e-06	4.20594
FSTL1	-1.03582	12.8994	8.12671	3.03898e-15	1.28107e-14	23.4667
SLC12A4	-1.03588	9.48678	12.35	4.999e-31	5.44264e-30	59.4412
MYO7B	-1.03596	2.55267	7.19841	2.05729e-12	7.14818e-12	17.058
SOX18	-1.03602	7.0437	8.1894	1.91499e-15	8.18117e-15	23.9217
SLFN12L	-1.03698	3.57334	5.85684	8.2132e-09	2.19857e-08	8.95194
TNFRSF1B	-1.03719	9.34105	8.47427	2.27149e-16	1.03244e-15	26.023
NAB1	-1.03732	9.82828	11.8858	4.27623e-29	4.18587e-28	55.0256
SCPEP1	-1.03775	10.9018	8.92875	6.78066e-18	3.39528e-17	29.488
ADORA2B	-1.0379	5.414	6.30041	6.17462e-10	1.80602e-09	11.4739
SLC27A1	-1.03891	9.2797	12.7526	9.77156e-33	1.16877e-31	63.3481
ZNF750	-1.03955	6.87797	5.65504	2.53092e-08	6.53509e-08	7.85815
FAM19A2	-1.04069	3.90526	6.38508	3.70227e-10	1.10437e-09	11.9734
DNHD1	-1.0407	6.922	9.61799	2.57505e-20	1.50073e-19	34.9954
FRY	-1.04075	9.52308	7.80056	3.21577e-14	1.26924e-13	21.1443
CES3	-1.04132	4.85018	3.81123	0.00015423	0.000283872	-0.505233
ECHDC2	-1.04181	9.02592	10.3246	6.34787e-23	4.37485e-22	40.9384
PLEKHG1	-1.0421	8.75282	8.33075	6.69443e-16	2.94589e-15	24.9574
OR10A3	-1.04238	0.318796	17.1341	7.49738e-53	2.60132e-51	109.403
CDH17	-1.04317	1.52545	8.6605	5.47583e-17	2.59557e-16	27.4263
PKD1L1	-1.04381	3.89226	7.14669	2.90487e-12	1.0016e-11	16.7195
CDK6	-1.04411	9.15099	6.42581	2.88884e-10	8.67917e-10	12.2157
TAF4B	-1.04426	7.25134	6.97425	9.04506e-12	3.01502e-11	15.6056
LPAR1	-1.04441	8.48734	8.09905	3.72286e-15	1.56014e-14	23.2668
PLCD3	-1.04517	8.83644	8.1686	2.23277e-15	9.49858e-15	23.7704
OTC	-1.04554	0.296671	14.6812	2.73973e-41	5.15465e-40	82.9172
EIF3L	-1.04586	12.5933	14.7572	1.22909e-41	2.34595e-40	83.7143
FNIP2	-1.04608	8.9025	8.90498	8.17472e-18	4.07192e-17	29.3034
MAMLD1	-1.04646	6.81256	7.21713	1.81503e-12	6.32951e-12	17.1809
HDAC4	-1.04651	8.30218	11.738	1.72801e-28	1.62648e-27	53.64
TSPAN6	-1.04667	9.69024	7.98281	8.68385e-15	3.55654e-14	22.4328
STAT4	-1.04672	5.65588	5.62462	2.99017e-08	7.66436e-08	7.69627
ADRA2C	-1.04767	4.93803	4.55519	6.47877e-06	1.36403e-05	2.5072
GFOD1	-1.04918	5.60861	8.66576	5.2582e-17	2.49724e-16	27.4663
ESRRB	-1.04945	1.92232	6.58034	1.11413e-10	3.44882e-10	13.1471
ARL4C	-1.04947	9.91744	8.38159	4.5723e-16	2.03504e-15	25.3332
C1R	-1.04947	11.9776	7.88622	1.74307e-14	6.99677e-14	21.7469
POPDC3	-1.04958	2.21473	4.8677	1.4854e-06	3.3056e-06	3.92073
ST6GALNAC6	-1.05029	9.83412	13.0795	3.81644e-34	4.94435e-33	66.5688
KLRK1	-1.05051	5.61836	5.13347	3.97905e-07	9.2904e-07	5.19025
2019-09-10	-1.05054	10.3578	13.7716	3.48404e-37	5.30812e-36	73.5226
EFHB	-1.05068	2.78054	5.50694	5.66059e-08	1.42095e-07	7.07713
LOXHD1	-1.05205	2.46141	8.45725	2.58401e-16	1.17014e-15	25.8959
KRT83	-1.05219	1.65606	4.83838	1.71158e-06	3.78926e-06	3.78441
LGALS3	-1.05242	11.4912	8.22383	1.48433e-15	6.39073e-15	24.1727
ZNF501	-1.05287	6.29846	8.72913	3.22301e-17	1.54697e-16	27.9493
GPC5	-1.05291	1.07995	8.21959	1.53167e-15	6.58626e-15	24.1417
CD79B	-1.05348	5.71784	5.11754	4.3131e-07	1.00457e-06	5.11243
ZNF658	-1.05368	5.79387	10.6379	4.05081e-24	2.98371e-23	43.6639
SYCE1L	-1.05372	1.73125	6.07304	2.37229e-09	6.61047e-09	10.1611
ACVRL1	-1.05384	8.72909	11.7119	2.20859e-28	2.0652e-27	53.3966
SLFN5	-1.05427	9.26135	7.09214	4.17071e-12	1.42119e-11	16.3647
PLEKHG4	-1.05468	8.04709	6.95299	1.03887e-11	3.4496e-11	15.4699
RCAN2	-1.055	7.99105	9.66763	1.7047e-20	1.00511e-19	35.4033
C17orf107	-1.05594	6.07628	7.11637	3.55264e-12	1.21639e-11	16.522
RBMS1	-1.05599	10.2172	10.6198	4.75718e-24	3.492e-23	43.5047
FCN1	-1.05631	4.38813	4.35415	1.5992e-05	3.25075e-05	1.64379
PDE4B	-1.05651	9.65257	5.7276	1.69499e-08	4.42194e-08	8.24756
EHBP1	-1.05828	9.8262	15.8097	1.57321e-46	3.84115e-45	94.9193
FTMT	-1.05927	0.383154	10.2079	1.74472e-22	1.1686e-21	39.9373
SLC39A12	-1.05952	0.997627	5.37788	1.12507e-07	2.76152e-07	6.4116
ANTXRL	-1.05999	0.738677	7.80831	3.04315e-14	1.20405e-13	21.1986
FAM181A	-1.06007	0.464147	12.6549	2.55536e-32	2.96942e-31	62.3935
SHPRH	-1.06037	8.57809	10.2489	1.2245e-22	8.30216e-22	40.2879
EPB41L4B	-1.06044	9.25417	8.08043	4.26626e-15	1.78394e-14	23.1326
PLIN2	-1.06089	10.008	7.88673	1.73668e-14	6.97277e-14	21.7505
ZNF699	-1.06101	5.06516	8.64268	6.28034e-17	2.96135e-16	27.291
GJB5	-1.06108	3.60771	4.02332	6.55942e-05	0.00012559	0.302246
ANKRD45	-1.06144	2.96784	6.31692	5.59107e-10	1.64319e-09	11.5708
ASS1	-1.06181	10.2899	5.20037	2.82978e-07	6.72338e-07	5.51945
HOXA1	-1.06189	4.09873	8.68852	4.41176e-17	2.10166e-16	27.6395
FBLN7	-1.06295	7.35849	8.16609	2.27455e-15	9.67148e-15	23.7521
WNT5B	-1.0631	6.40077	6.48823	1.97038e-10	5.98163e-10	12.5896
FES	-1.06454	7.52658	9.08323	1.99452e-18	1.03531e-17	30.6964
SIRPB1	-1.06607	6.20025	7.83055	2.59676e-14	1.03388e-13	21.3546
RHCG	-1.06613	2.33012	3.62958	0.00031094	0.000554581	-1.16389
ITPR2	-1.06619	10.9456	7.96198	1.00972e-14	4.11963e-14	22.2843
SLC2A9	-1.0663	6.00929	9.97311	1.30451e-21	8.21429e-21	37.946
TMEM200C	-1.06659	3.55282	5.907	6.17737e-09	1.66977e-08	9.22909
DGKI	-1.06723	3.56853	7.20048	2.02902e-12	7.05712e-12	17.0716
KDR	-1.06725	9.86907	11.2791	1.23663e-26	1.04878e-25	49.4043
SPESP1	-1.06832	4.66125	3.94852	8.90728e-05	0.000168103	0.0127692
SCARA3	-1.06846	9.53739	6.80859	2.63778e-11	8.55144e-11	14.557
FBLN1	-1.06854	11.8027	6.99824	7.73314e-12	2.58879e-11	15.7593
CSF1	-1.06859	9.173	8.72032	3.45035e-17	1.65378e-16	27.882
SNAI2	-1.06878	8.74743	8.70148	3.99179e-17	1.90742e-16	27.7382
CSGALNACT1	-1.06883	8.13612	8.81532	1.64937e-17	8.045e-17	28.6104
PNMA2	-1.06901	6.41726	6.10926	1.91967e-09	5.39572e-09	10.3674
KRT40	-1.06902	1.56463	6.36415	4.20341e-10	1.24864e-09	11.8494
FBXO32	-1.06923	9.86806	7.65653	8.90236e-14	3.41433e-13	20.1428
TSPAN12	-1.06972	7.69248	6.70295	5.16378e-11	1.6372e-10	13.8994
CA13	-1.06999	6.19634	6.67889	6.01035e-11	1.89649e-10	13.7508
POU2AF1	-1.07091	6.21439	3.98609	7.64312e-05	0.000145192	0.157516
HS6ST2	-1.07118	5.72457	4.06728	5.46726e-05	0.000105635	0.474801
KRT9	-1.07176	1.13337	5.58168	3.77915e-08	9.62046e-08	7.46901
EGFL8	-1.07259	5.79711	8.64086	6.36878e-17	3.00057e-16	27.2772
TAS2R5	-1.07391	2.97599	9.48388	7.79114e-20	4.41017e-19	33.9007
ZNF214	-1.0744	5.41781	5.46957	6.91606e-08	1.72625e-07	6.88295
ABHD6	-1.07451	7.13753	10.3777	3.99577e-23	2.77165e-22	41.3968
PDE3A	-1.07469	5.76932	6.1036	1.98432e-09	5.5674e-09	10.3352
CHRFAM7A	-1.07487	3.86608	8.36879	5.03367e-16	2.23285e-15	25.2384
GAS6	-1.07518	10.5442	8.29019	9.06337e-16	3.95887e-15	24.6588
OTUD7A	-1.07575	3.21259	7.04805	5.57779e-12	1.88307e-11	16.0796
PGA5	-1.07759	0.294911	12.9179	1.90589e-33	2.38097e-32	64.9714
CYP4A11	-1.07761	1.60664	5.84592	8.73596e-09	2.33231e-08	8.89192
EPHX2	-1.07779	8.80269	6.56864	1.19827e-10	3.70326e-10	13.0759
TRIM68	-1.07818	7.62428	8.66172	5.4246e-17	2.57342e-16	27.4355
CDKN2C	-1.07851	8.31063	9.57521	3.67e-20	2.11869e-19	34.645
ME1	-1.07877	8.22758	5.18653	3.03749e-07	7.18005e-07	5.45102
ZFPM2	-1.07889	6.98038	7.31286	9.5229e-13	3.38496e-12	17.8141
CHD9	-1.07965	10.1825	11.78	1.1631e-28	1.10446e-27	54.0328
IQUB	-1.08005	3.66696	5.35262	1.28489e-07	3.14301e-07	6.28301
LY6G5B	-1.08042	4.97197	10.8525	5.96703e-25	4.60905e-24	45.5616
SH2D1B	-1.08048	2.55311	7.32288	8.89761e-13	3.17256e-12	17.8807
HSPA4L	-1.08132	7.0145	5.76367	1.38653e-08	3.64106e-08	8.44276
CHGA	-1.08193	1.48339	3.45243	0.00059921	0.00103815	-1.77669
FAM20A	-1.08198	7.45343	7.14662	2.90623e-12	1.00187e-11	16.719
STS	-1.08203	9.07518	9.41116	1.4137e-19	7.88764e-19	33.3117
SHOX	-1.08214	0.464062	12.1968	2.19183e-30	2.30337e-29	57.974
RPL9	-1.08286	9.42691	4.81123	1.95029e-06	4.29278e-06	3.65889
RBM20	-1.08314	5.03194	4.65682	4.04961e-06	8.68715e-06	2.95742
PKN3	-1.08335	7.37011	10.0952	4.59964e-22	2.98289e-21	38.9777
TEAD1	-1.08384	10.6493	12.1889	2.36664e-30	2.48099e-29	57.8978
RNF182	-1.08397	3.67198	4.89413	1.30652e-06	2.92004e-06	4.0442
RASA4	-1.08419	7.66989	10.0592	6.26437e-22	4.01689e-21	38.672
ADD2	-1.08426	4.98077	5.44719	7.79292e-08	1.93553e-07	6.76728
MXRA7	-1.08459	10.8015	10.4803	1.62754e-23	1.15655e-22	42.2863
LAYN	-1.08531	7.00444	9.2619	4.75445e-19	2.56181e-18	32.113
CDC42EP2	-1.08535	7.83843	11.9923	1.55351e-29	1.55988e-28	56.0304
VENTX	-1.0854	3.72451	8.852	1.2384e-17	6.10368e-17	28.8933
ITGB3	-1.08556	7.19541	7.26822	1.28749e-12	4.54438e-12	17.518
DAPK2	-1.08643	7.92567	9.26263	4.72658e-19	2.5476e-18	32.1188
RNPC3	-1.08665	7.47463	14.76	1.19302e-41	2.28218e-40	83.7439
HBEGF	-1.08709	7.55588	9.38778	1.71104e-19	9.50334e-19	33.123
THBD	-1.08789	9.1006	8.60597	8.32466e-17	3.88999e-16	27.013
CC2D2A	-1.08821	8.07669	11.4783	1.96106e-27	1.73888e-26	51.2305
TDGF1	-1.08837	1.55961	6.963	9.73337e-12	3.23627e-11	15.5338
ZIM2	-1.08861	1.67992	5.15882	3.49853e-07	8.21437e-07	5.31452
EFNB1	-1.08892	8.81198	11.7282	1.89551e-28	1.77924e-27	53.5483
SYNE2	-1.08901	11.5935	12.7853	7.07904e-33	8.57489e-32	63.6682
FNDC5	-1.09064	4.66179	7.4554	3.60048e-13	1.32345e-12	18.7693
FBXW7	-1.09067	8.75905	17.8012	4.30624e-56	1.83604e-54	116.83
PDP2	-1.09109	7.22528	11.9166	3.19279e-29	3.1487e-28	55.3155
PSAT1	-1.09109	6.65942	3.74874	0.000196945	0.000358463	-0.735291
GPR62	-1.09168	1.64704	8.59826	8.83181e-17	4.12023e-16	26.9547
GAS7	-1.09193	9.70756	7.65637	8.91232e-14	3.41739e-13	20.1417
REV3L	-1.09231	9.50801	12.4153	2.65301e-31	2.93182e-30	60.0701
PITPNM3	-1.09258	6.4423	7.04536	5.67724e-12	1.91476e-11	16.0623
SLC8A3	-1.09261	2.10966	7.77756	3.78745e-14	1.48619e-13	20.9833
SLC15A2	-1.09276	6.27258	4.79308	2.12735e-06	4.66575e-06	3.57537
TSPYL2	-1.09288	9.03383	12.8886	2.54949e-33	3.17344e-32	64.6825
TSSK3	-1.09313	4.23709	9.64347	2.08406e-20	1.22206e-19	35.2046
PABPC4L	-1.09322	5.39243	8.55344	1.24408e-16	5.7445e-16	26.6167
UBL4B	-1.09473	1.58574	9.6594	1.82558e-20	1.0738e-19	35.3356
RETSAT	-1.0949	11.1237	11.5207	1.32126e-27	1.1795e-26	51.6222
ELOVL7	-1.09509	7.44035	6.21284	1.04194e-09	2.99446e-09	10.9633
MBP	-1.09514	9.2133	8.50036	1.8636e-16	8.52016e-16	26.2182
RPS6KA2	-1.09622	9.59952	10.4194	2.77493e-23	1.94211e-22	41.7578
PHLDB1	-1.0976	10.7292	12.8335	4.39999e-33	5.37533e-32	64.1405
ITIH4	-1.09876	5.0086	6.94572	1.08917e-11	3.61021e-11	15.4236
SLC26A10	-1.09884	3.38106	7.81333	2.93619e-14	1.16335e-13	21.2338
RGS5	-1.09885	11.3158	6.58048	1.11316e-10	3.44645e-10	13.1479
ARHGAP23	-1.09902	8.84795	10.2274	1.47465e-22	9.93535e-22	40.1038
GLIPR1L2	-1.09968	4.48677	6.3688	4.0867e-10	1.2146e-09	11.8769
FBLN2	-1.09972	11.1001	6.51986	1.62123e-10	4.95505e-10	12.7803
CTNNAL1	-1.10005	8.76678	10.4812	1.6152e-23	1.14826e-22	42.2938
JAG2	-1.10019	9.00639	11.1774	3.1411e-26	2.60845e-25	48.48
LAMA4	-1.1002	11.0876	9.97282	1.30778e-21	8.23188e-21	37.9435
ERBB4	-1.10054	8.68332	3.12071	0.00190084	0.00312313	-2.84509
PCDHGB2	-1.10079	5.32831	5.65526	2.52784e-08	6.52812e-08	7.85934
PLEKHG5	-1.10105	7.95092	10.1642	2.54394e-22	1.68482e-21	39.564
RAB9B	-1.10116	3.24319	8.17423	2.14192e-15	9.13246e-15	23.8113
SCHIP1	-1.1013	7.44799	9.596	3.08991e-20	1.79104e-19	34.8152
OGFRL1	-1.10171	9.00715	8.73571	3.06279e-17	1.47172e-16	27.9996
PNMA3	-1.10207	2.84119	4.99588	7.92767e-07	1.80524e-06	4.52534
C6orf201	-1.1021	2.85263	9.16771	1.01495e-18	5.37419e-18	31.3637
TANK	-1.10235	9.94501	16.4185	2.04842e-49	5.7937e-48	101.529
TMEM55A	-1.10237	7.44426	9.62117	2.50813e-20	1.46372e-19	35.0214
ZC4H2	-1.10249	6.64646	7.21082	1.89339e-12	6.59339e-12	17.1395
CDC42EP5	-1.10253	5.34496	7.99889	7.72801e-15	3.17569e-14	22.5476
MFAP5	-1.10268	9.68951	5.7827	1.24658e-08	3.2841e-08	8.54619
LTC4S	-1.10307	3.77623	7.27327	1.24444e-12	4.39878e-12	17.5514
FILIP1L	-1.10446	9.7875	8.70152	3.99054e-17	1.90736e-16	27.7385
CFH	-1.10469	10.245	8.40497	3.8346e-16	1.71696e-15	25.5067
SERPINF1	-1.10482	11.6077	7.78023	3.71611e-14	1.45954e-13	21.002
PNMA6A	-1.10504	4.02237	5.62876	2.92321e-08	7.50394e-08	7.71825
SPATA9	-1.10528	2.85612	11.1006	6.33304e-26	5.19618e-25	47.7849
SCML1	-1.1053	6.90693	7.22542	1.71687e-12	5.99821e-12	17.2355
ACAD11	-1.10538	8.30927	15.0779	4.10156e-43	8.43946e-42	87.0954
ARGLU1	-1.10645	10.3772	12.4292	2.31707e-31	2.56554e-30	60.2045
WBP2NL	-1.10649	3.17291	8.04034	5.71686e-15	2.37142e-14	22.8444
EFCAB6	-1.10663	5.30455	6.3231	5.38669e-10	1.58721e-09	11.6072
TCN2	-1.10672	8.74236	9.81177	5.10412e-21	3.10229e-20	36.5962
ZNF132	-1.1076	6.38106	10.9585	2.2964e-25	1.82731e-24	46.508
SPG20	-1.10836	9.97799	11.3235	8.21253e-27	7.03111e-26	49.8102
SAV1	-1.10847	9.93477	16.3247	5.73411e-49	1.57757e-47	100.505
RNASE1	-1.10855	10.8167	7.49089	2.81949e-13	1.04602e-12	19.0096
ALPK3	-1.10902	7.39248	9.52824	5.40832e-20	3.09511e-19	34.2616
FMO3	-1.10992	5.43446	5.96487	4.43635e-09	1.21313e-08	9.55135
PER3	-1.11008	9.52628	10.0428	7.20078e-22	4.59499e-21	38.5341
FER	-1.11127	5.94537	9.6906	1.40777e-20	8.36366e-20	35.5926
BDH2	-1.11158	9.05413	12.0867	6.30493e-30	6.43253e-29	56.9253
DZIP1	-1.11158	7.59353	8.29016	9.06579e-16	3.95892e-15	24.6585
MALL	-1.11168	8.56578	6.59763	1.00032e-10	3.11115e-10	13.2524
APBB1IP	-1.11177	8.1771	8.77845	2.19796e-17	1.06511e-16	28.327
NBEAL1	-1.11259	7.66077	7.04583	5.6598e-12	1.90963e-11	16.0653
HABP4	-1.11276	7.76999	12.6049	4.17121e-32	4.78545e-31	61.907
HSPB8	-1.11296	9.08778	4.44693	1.05845e-05	2.19158e-05	2.03775
VAMP2	-1.1146	10.4708	14.082	1.42809e-38	2.32455e-37	76.6976
CD200R1	-1.11465	4.372	6.74511	3.95352e-11	1.26779e-10	14.1608
LGI1	-1.11492	1.13288	5.01534	7.19808e-07	1.64391e-06	4.61839
TMEM232	-1.11514	3.58221	5.29846	1.70525e-07	4.12709e-07	6.00913
ZNF578	-1.11527	5.12427	7.31682	9.27092e-13	3.29949e-12	17.8404
AP3B2	-1.11633	5.37177	4.18859	3.27929e-05	6.47398e-05	0.960014
ARHGAP31	-1.11651	9.55198	11.6633	3.48537e-28	3.21524e-27	52.944
THRA	-1.11682	9.3467	10.1123	3.97238e-22	2.5918e-21	39.1228
GOLGA7B	-1.11773	5.77372	6.20048	1.12125e-09	3.21536e-09	10.8918
ASB1	-1.11776	8.45779	16.9942	3.55247e-52	1.18003e-50	107.855
CRB1	-1.11777	2.12932	7.09743	4.0272e-12	1.37366e-11	16.399
PRDM11	-1.11779	4.13488	10.0976	4.50831e-22	2.92698e-21	38.9976
NFIL3	-1.11799	8.89184	8.30648	8.02655e-16	3.51944e-15	24.7785
PCCA	-1.11853	8.39135	11.0333	1.16747e-25	9.44782e-25	47.1786
TGFB1I1	-1.12025	8.857	9.89275	2.57846e-21	1.59548e-20	37.2718
AVPI1	-1.12031	7.30535	11.4753	2.01671e-27	1.78638e-26	51.2027
RAMP2	-1.12089	8.59046	8.92559	6.95139e-18	3.47874e-17	29.4634
CLIP3	-1.12162	8.51692	10.2821	9.17836e-23	6.26512e-22	40.5733
PLAG1	-1.12283	4.72622	6.63891	7.72694e-11	2.41988e-10	13.505
CAPS2	-1.12287	5.20339	7.88712	1.73176e-14	6.95463e-14	21.7533
RCSD1	-1.12294	8.23246	8.86098	1.15433e-17	5.70507e-17	28.9627
ACY3	-1.12317	2.959	4.64276	4.32405e-06	9.24925e-06	2.89455
VWA5A	-1.12444	9.37273	8.05495	5.1391e-15	2.13745e-14	22.9493
CHRNA7	-1.12453	1.55864	7.87048	1.9514e-14	7.81288e-14	21.6358
ZFP2	-1.12503	5.65035	10.0028	1.01289e-21	6.41337e-21	38.1964
NPFF	-1.1262	2.68603	10.6863	2.63583e-24	1.96683e-23	44.0896
LIX1L	-1.12774	8.66259	12.2766	1.01592e-30	1.08898e-29	58.7372
ESAM	-1.1279	9.1614	12.2993	8.15902e-31	8.80086e-30	58.9549
CAMK1	-1.12869	7.6	12.595	4.59735e-32	5.26025e-31	61.8104
TKTL1	-1.1291	0.902259	8.85757	1.18561e-17	5.85295e-17	28.9363
WNT9B	-1.12953	1.77407	9.12587	1.419e-18	7.45834e-18	31.0327
CCDC89	-1.1304	4.28829	7.73968	4.95439e-14	1.9304e-13	20.7191
ZMAT1	-1.13056	8.37139	8.20726	1.67814e-15	7.19623e-15	24.0517
RASL10B	-1.13077	5.66788	6.55371	1.31468e-10	4.04772e-10	12.9852
MYO9A	-1.13082	9.04027	9.85828	3.44967e-21	2.12002e-20	36.9838
BMP4	-1.13104	7.29359	5.44327	7.95743e-08	1.97467e-07	6.74704
PRG2	-1.13121	2.97827	6.71249	4.86136e-11	1.54618e-10	13.9584
FAM65B	-1.13163	6.8555	6.23025	9.3944e-10	2.70986e-09	11.0644
SCARF1	-1.13223	7.16023	12.7387	1.12107e-32	1.33438e-31	63.2117
SCTR	-1.13336	0.532331	13.2579	6.39349e-35	8.69028e-34	68.3436
MDFIC	-1.13341	9.66289	11.3929	4.32741e-27	3.76125e-26	50.4455
BTBD8	-1.13401	3.44264	6.98815	8.26038e-12	2.76098e-11	15.6946
ABCA1	-1.13409	9.84014	10.178	2.25763e-22	1.49984e-21	39.6822
C6orf163	-1.13427	2.65442	11.4279	3.12916e-27	2.74201e-26	50.7671
CLVS1	-1.13436	2.49291	8.05287	5.21785e-15	2.16968e-14	22.9343
RASGEF1B	-1.13604	7.6668	9.2668	4.56992e-19	2.46782e-18	32.1521
TTC23	-1.13618	8.07814	12.0831	6.52704e-30	6.65517e-29	56.8909
SETBP1	-1.13669	9.08577	8.25762	1.15507e-15	5.02101e-15	24.4198
STX1B	-1.13678	4.91827	7.17726	2.36961e-12	8.21669e-12	16.9193
DUOX1	-1.13688	6.32982	5.02555	6.84181e-07	1.56609e-06	4.66733
ADRA1B	-1.13724	3.65767	6.56858	1.19869e-10	3.7039e-10	13.0755
NOL4	-1.13741	1.96035	4.91261	1.19395e-06	2.67823e-06	4.13092
CLEC9A	-1.13755	2.42494	6.22376	9.76427e-10	2.81277e-09	11.0267
BEX5	-1.13831	5.19635	6.7619	3.55313e-11	1.14346e-10	14.2653
IL18RAP	-1.13884	3.09852	6.28268	6.8682e-10	2.00036e-09	11.37
CDC42EP3	-1.13919	9.05202	9.2892	3.81241e-19	2.07312e-18	32.3312
QKI	-1.1396	10.8032	12.7634	8.7901e-33	1.05728e-31	63.4532
NYNRIN	-1.14029	9.00328	8.73367	3.11152e-17	1.4943e-16	27.984
LYSMD4	-1.14076	6.93459	13.5434	3.56869e-36	5.15744e-35	71.2107
ERRFI1	-1.14145	10.6152	9.41643	1.35405e-19	7.55973e-19	33.3543
PC	-1.14198	9.30743	9.03725	2.87523e-18	1.47505e-17	30.3352
C1orf61	-1.14211	2.18751	6.65268	7.08766e-11	2.22658e-10	13.5895
TMEM133	-1.14215	6.01928	11.421	3.33788e-27	2.92043e-26	50.703
HPR	-1.14242	0.522445	11.3676	5.46919e-27	4.72251e-26	50.2133
EPS8	-1.14257	10.1513	11.2813	1.21122e-26	1.02825e-25	49.4249
HAS1	-1.14298	2.67563	4.75199	2.58745e-06	5.63161e-06	3.38728
RHBDL3	-1.14344	4.52947	4.8261	1.81579e-06	4.00961e-06	3.72759
ADRB3	-1.14367	0.799217	10.0754	5.45189e-22	3.51584e-21	38.8095
MERTK	-1.14391	7.67563	10.6769	2.86408e-24	2.13066e-23	44.0074
PLCZ1	-1.14444	0.315859	18.9778	7.00767e-62	4.1997e-60	130.098
SHISA6	-1.14492	2.66404	6.11759	1.82813e-09	5.14772e-09	10.4151
PSG4	-1.14556	1.66054	4.56562	6.17634e-06	1.30405e-05	2.55296
PLB1	-1.14565	5.31722	8.2769	1.00069e-15	4.36321e-15	24.5612
ZNF559	-1.14583	7.95098	11.8701	4.96501e-29	4.83249e-28	54.8774
XG	-1.14665	6.12436	6.12677	1.73222e-09	4.88488e-09	10.4676
ASPRV1	-1.14691	5.3904	11.5758	7.90671e-28	7.15528e-27	52.1315
SLC36A2	-1.14727	0.437558	13.3268	3.19591e-35	4.40336e-34	69.0325
NT5E	-1.14763	8.62981	8.43441	3.07099e-16	1.38445e-15	25.7256
DOK5	-1.14918	5.48205	7.48154	3.00748e-13	1.11239e-12	18.9462
2019-09-04	-1.15045	7.94	10.7188	1.97297e-24	1.47801e-23	44.3766
C9orf66	-1.15113	4.16484	7.35354	7.22549e-13	2.5947e-12	18.0852
C1orf116	-1.15137	8.76165	4.4188	1.20047e-05	2.47338e-05	1.91749
RHOQ	-1.1525	10.5613	13.2433	7.39877e-35	1.00091e-33	68.1985
SCUBE1	-1.15297	5.27414	4.02083	6.62698e-05	0.000126799	0.292543
PRR4	-1.15322	5.22712	6.68856	5.65492e-11	1.78796e-10	13.8105
GOLGA8G	-1.15357	0.572679	11.8442	6.34361e-29	6.13251e-28	54.6343
ARHGAP42	-1.15586	6.99774	9.05973	2.40495e-18	1.23972e-17	30.5116
PCDHB16	-1.15594	7.03799	6.73435	4.23285e-11	1.35306e-10	14.094
EPHA6	-1.15751	1.84195	5.73676	1.61085e-08	4.20948e-08	8.29703
ACR	-1.15764	1.93219	8.20359	1.72436e-15	7.38703e-15	24.025
RGPD5	-1.15791	6.21844	7.92554	1.31364e-14	5.31786e-14	22.0253
TUBB6	-1.15841	10.1546	9.80087	5.59383e-21	3.39152e-20	36.5056
RASGRF2	-1.15931	7.07901	7.89018	1.69415e-14	6.80839e-14	21.7749
AGPAT2	-1.15939	9.62063	9.36559	2.05018e-19	1.13355e-18	32.9443
PHLDA1	-1.1594	10.1094	8.2345	1.37142e-15	5.92541e-15	24.2506
C4orf19	-1.16027	6.58385	4.822	1.85191e-06	4.08464e-06	3.70865
MITF	-1.16106	8.22783	9.58815	3.29743e-20	1.90939e-19	34.7509
CLTCL1	-1.16131	5.60297	8.00235	7.53613e-15	3.10056e-14	22.5723
RNF175	-1.16216	3.35536	8.25902	1.14307e-15	4.97013e-15	24.4301
MSRA	-1.16222	6.89649	11.8466	6.19748e-29	5.99801e-28	54.6574
HDC	-1.16253	4.4301	4.71179	3.12942e-06	6.76482e-06	3.20471
MICAL3	-1.16308	9.58447	11.831	7.18317e-29	6.92851e-28	54.511
SFRP5	-1.16396	1.14592	6.7361	4.18609e-11	1.33936e-10	14.1048
MYCBP2	-1.16543	10.877	12.1379	3.86237e-30	3.99424e-29	57.4117
C2orf72	-1.1658	6.5167	4.03338	6.2924e-05	0.000120775	0.341606
FRZB	-1.16638	8.17909	6.80921	2.6272e-11	8.52039e-11	14.5609
CNTN2	-1.1679	3.15839	5.19852	2.85674e-07	6.78188e-07	5.51029
SPAG6	-1.16808	2.86576	3.22909	0.00131752	0.00220402	-2.50744
PABPC5	-1.16937	4.60134	7.80046	3.21808e-14	1.26975e-13	21.1436
FZD9	-1.16981	2.78989	5.15699	3.53115e-07	8.28753e-07	5.30556
PKDREJ	-1.17128	3.18602	8.71499	3.59578e-17	1.72155e-16	27.8413
ARHGEF10	-1.17155	9.15906	12.9986	8.55575e-34	1.08949e-32	65.7669
TSPAN2	-1.1721	7.19212	7.82261	2.74817e-14	1.09213e-13	21.2989
PRKG2	-1.17278	3.95563	6.02923	3.06014e-09	8.45573e-09	9.91303
MAP6	-1.17313	6.18806	7.49785	2.68735e-13	9.98074e-13	19.0567
ADAM32	-1.17475	4.09743	5.10577	4.57727e-07	1.06465e-06	5.05505
BCAN	-1.17516	3.3655	5.58937	3.6245e-08	9.24188e-08	7.50955
FMO5	-1.17547	7.52308	5.06614	5.58637e-07	1.28939e-06	4.86283
ARRB1	-1.17611	9.08436	10.6067	5.34245e-24	3.90655e-23	43.3897
CSTA	-1.17626	6.64503	5.50321	5.77517e-08	1.44844e-07	7.05771
CD163L1	-1.17651	6.34702	6.01883	3.25016e-09	8.962e-09	9.85435
PLCE1	-1.1766	7.49891	6.34409	4.74589e-10	1.40516e-09	11.7308
SERPIND1	-1.17696	1.14872	8.07359	4.48526e-15	1.87277e-14	23.0833
MEGF10	-1.17777	5.97702	4.75324	2.57209e-06	5.60103e-06	3.393
COL11A2	-1.1781	3.31103	5.25673	2.11736e-07	5.0907e-07	5.79979
NEGR1	-1.17835	7.57969	6.29626	6.33046e-10	1.84971e-09	11.4496
C7orf31	-1.17873	6.09771	9.74154	9.19958e-21	5.51524e-20	36.0134
FILIP1	-1.18009	6.29039	9.64856	1.99771e-20	1.17263e-19	35.2465
KCNA5	-1.18042	2.77283	8.62926	6.96293e-17	3.26793e-16	27.1892
SLC25A37	-1.18051	8.63999	9.45206	1.0116e-19	5.68674e-19	33.6426
BCO2	-1.18273	3.80486	7.81825	2.83497e-14	1.1254e-13	21.2683
ZSCAN4	-1.18286	0.708848	10.7866	1.07732e-24	8.21772e-24	44.9762
CCL24	-1.18287	0.452016	11.861	5.4082e-29	5.24599e-28	54.7926
DHRS3	-1.18322	9.63473	10.604	5.46919e-24	3.99582e-23	43.3665
GLI1	-1.18364	4.19208	6.18968	1.19535e-09	3.41698e-09	10.8293
LPIN1	-1.18457	9.41983	10.1485	2.91213e-22	1.91829e-21	39.4302
BEX2	-1.1848	6.83398	5.7913	1.18798e-08	3.13503e-08	8.593
SLC47A1	-1.18481	5.3559	6.6705	6.33646e-11	1.99572e-10	13.6991
LHFPL1	-1.18543	2.60145	7.37715	6.15235e-13	2.22377e-12	18.2431
CLCNKA	-1.18557	2.65423	7.08545	4.35915e-12	1.48275e-11	16.3213
ALS2CR11	-1.18602	2.48094	7.43137	4.24623e-13	1.5505e-12	18.6073
GRAMD1C	-1.18613	7.57418	9.01047	3.556e-18	1.81183e-17	30.1253
DYNC2H1	-1.18642	8.80098	8.23604	1.35586e-15	5.85968e-15	24.2619
MCF2L2	-1.18652	2.59665	7.6272	1.09337e-13	4.1701e-13	19.9407
PLCL2	-1.18689	7.41701	9.52568	5.52398e-20	3.1592e-19	34.2407
YAP1	-1.18801	11.338	12.3544	4.78807e-31	5.22723e-30	59.484
CHST7	-1.18895	5.57948	13.6759	9.26147e-37	1.38277e-35	72.5511
ZNF540	-1.18949	6.11677	10.6591	3.35497e-24	2.48184e-23	43.8506
CLCN6	-1.18952	8.39718	18.5765	6.74556e-60	3.60183e-58	125.552
ABCB11	-1.1896	1.14457	8.23312	1.38558e-15	5.98508e-15	24.2405
C3orf58	-1.18972	8.76774	9.25052	5.21229e-19	2.79971e-18	32.0222
DUOXA1	-1.18993	3.60808	5.17737	3.18298e-07	7.5105e-07	5.40582
LRRIQ1	-1.19062	3.76898	4.77736	2.29323e-06	5.01799e-06	3.50323
GDA	-1.19072	0.864339	7.74077	4.91646e-14	1.91605e-13	20.7267
CACNA1C	-1.19128	7.86312	8.43471	3.06403e-16	1.38167e-15	25.7279
IRS1	-1.19215	10.1705	7.30497	1.00455e-12	3.56776e-12	17.7616
GYPE	-1.19291	2.53646	9.61374	2.66749e-20	1.55249e-19	34.9605
STARD8	-1.19367	7.48416	12.3885	3.44035e-31	3.77997e-30	59.8121
NFAT5	-1.19373	10.5547	14.9496	1.60306e-42	3.20238e-41	85.7398
ITGB4	-1.19484	11.0096	6.5413	1.41976e-10	4.36261e-10	12.91
FZD5	-1.19634	7.25648	10.5821	6.64038e-24	4.82681e-23	43.1743
FOXO4	-1.19648	8.81719	13.6414	1.31764e-36	1.9419e-35	72.2007
CRHR2	-1.19674	0.711639	14.2156	3.57285e-39	6.02743e-38	78.0749
FGFR2	-1.19679	9.40938	5.85774	8.17122e-09	2.18801e-08	8.95693
ADCY8	-1.19844	0.765793	7.56011	1.74577e-13	6.55763e-13	19.4807
MT1E	-1.19854	8.66461	6.13708	1.63041e-09	4.60915e-09	10.5267
RBMS2	-1.19874	9.7801	16.291	8.29038e-49	2.2663e-47	100.138
PLCG2	-1.20009	8.48949	9.09253	1.85192e-18	9.63923e-18	30.7697
POU3F3	-1.20025	0.586942	9.32941	2.75167e-19	1.51069e-18	32.6535
ASPG	-1.2006	1.00222	8.16354	2.31763e-15	9.84734e-15	23.7337
MXI1	-1.20137	9.83592	12.7893	6.80772e-33	8.25207e-32	63.707
KLKB1	-1.20271	2.00471	8.84817	1.27603e-17	6.27773e-17	28.8638
MCC	-1.20402	9.37585	9.28958	3.80059e-19	2.06787e-18	32.3343
ACTBL2	-1.20452	1.7757	7.27149	1.25946e-12	4.44822e-12	17.5396
PPP4R4	-1.20476	3.89343	3.47567	0.000550668	0.000956761	-1.69798
TDRD9	-1.20545	3.53149	4.6939	3.40424e-06	7.33669e-06	3.12393
RNF145	-1.2058	9.86459	9.95949	1.46465e-21	9.19227e-21	37.8314
LRRC8C	-1.20621	8.89178	10.9138	3.43696e-25	2.69855e-24	46.1084
MAF	-1.20639	9.35287	12.3762	3.87733e-31	4.24919e-30	59.6934
CYP7A1	-1.20717	0.865263	14.0404	2.19423e-38	3.54134e-37	76.2707
FAM135A	-1.20735	7.49513	9.58582	3.36159e-20	1.94589e-19	34.7318
FAT3	-1.20775	4.7221	5.93474	5.27269e-09	1.43405e-08	9.38322
RILP	-1.20837	6.17654	11.0238	1.27254e-25	1.02738e-24	47.0931
AADACL3	-1.20865	0.317232	12.6352	3.0999e-32	3.58517e-31	62.2017
ZNF300	-1.2088	6.1636	7.42287	4.50106e-13	1.6411e-12	18.55
PRTG	-1.2097	5.86637	6.45591	2.40301e-10	7.24879e-10	12.3956
ZIK1	-1.20978	5.93603	6.45989	2.34512e-10	7.08288e-10	12.4195
PAPLN	-1.21076	7.86038	8.5078	1.76114e-16	8.06249e-16	26.2739
ARHGAP19	-1.21104	8.9708	16.4192	2.03314e-49	5.75999e-48	101.537
PRSS45	-1.21232	1.2733	8.46139	2.50439e-16	1.13499e-15	25.9267
KCNN4	-1.21291	8.05	5.54148	4.69921e-08	1.18762e-07	7.25763
ANO6	-1.21318	11.2647	15.9533	3.30973e-47	8.34247e-46	96.47
OR2A1	-1.21324	2.269	12.9958	8.79034e-34	1.11853e-32	65.7401
PODN	-1.21575	9.79602	6.95598	1.01882e-11	3.38552e-11	15.489
LRRC34	-1.21647	5.30405	11.3616	5.78151e-27	4.97715e-26	50.1582
ZNF98	-1.21767	4.063	4.82795	1.79971e-06	3.97513e-06	3.73614
CHST2	-1.21784	6.96511	8.97274	4.79283e-18	2.42543e-17	29.8306
HBG1	-1.21809	0.553006	11.5904	6.89618e-28	6.27059e-27	52.2671
ACSBG2	-1.21911	1.3442	13.5217	4.44949e-36	6.3873e-35	70.9915
PRRG1	-1.21926	7.61855	9.31678	3.04879e-19	1.66793e-18	32.5521
FBXO40	-1.21952	0.494022	13.7749	3.36633e-37	5.13335e-36	73.5568
KLF10	-1.22032	10.7789	14.5234	1.43881e-40	2.60414e-39	81.2682
FADS3	-1.22073	8.15939	10.9364	2.80472e-25	2.21739e-24	46.3098
TRIM50	-1.22089	0.917392	11.4097	3.70497e-27	3.23172e-26	50.5995
NUDT11	-1.22107	5.03106	7.52523	2.22368e-13	8.30006e-13	19.2429
TM4SF1	-1.22172	11.9426	6.44822	2.51895e-10	7.59586e-10	12.3496
C16orf86	-1.22262	4.4325	10.9145	3.41596e-25	2.6833e-24	46.1144
COL2A1	-1.22273	4.98523	2.85029	0.00453521	0.00712628	-3.63901
GCK	-1.22278	1.81818	9.57542	3.66375e-20	2.11579e-19	34.6467
ATP2B2	-1.22459	3.04704	5.13534	3.94157e-07	9.20667e-07	5.19939
COLEC11	-1.22464	2.8103	6.6293	8.2069e-11	2.5655e-10	13.446
RRAS2	-1.22622	8.09687	9.08439	1.97605e-18	1.02697e-17	30.7056
FGFR1	-1.22631	11.159	8.4926	1.9767e-16	9.02183e-16	26.1601
TMEM170B	-1.22716	7.65575	11.5328	1.18101e-27	1.0576e-26	51.7335
PLA2G16	-1.22746	10.1756	7.63087	1.06564e-13	4.06977e-13	19.9659
SV2A	-1.22788	6.10361	7.06116	5.11669e-12	1.73355e-11	16.1642
ATP6V1B1	-1.22811	7.5063	4.33163	1.76578e-05	3.57748e-05	1.54931
FGD5	-1.22918	9.04377	9.41825	1.3341e-19	7.45567e-19	33.369
WIPF3	-1.22975	3.80937	7.32988	8.48513e-13	3.0299e-12	17.9274
ZFP37	-1.23103	5.92606	9.51685	5.94045e-20	3.39058e-19	34.1688
CAV3	-1.23111	0.452281	14.1029	1.14943e-38	1.88168e-37	76.9133
SCGB2A1	-1.23126	5.36147	3.31614	0.000974205	0.00165309	-2.2282
PLN	-1.23256	6.06482	7.44614	3.83703e-13	1.40647e-12	18.7068
KCNMA1	-1.2338	9.07219	6.18064	1.26103e-09	3.59873e-09	10.7772
STEAP1	-1.23452	7.53187	7.30363	1.01365e-12	3.59859e-12	17.7528
TRO	-1.23485	7.11836	9.08397	1.98278e-18	1.02984e-17	30.7022
INPP1	-1.23549	7.72246	12.831	4.50729e-33	5.50249e-32	64.1166
CALCOCO1	-1.23688	10.4618	17.2465	2.14372e-53	7.73544e-52	110.649
PCDHA3	-1.237	4.78991	5.38916	1.06008e-07	2.60648e-07	6.46921
ZNF219	-1.23715	8.1001	10.3828	3.82418e-23	2.65585e-22	41.4402
GABRG3	-1.23746	0.873877	7.33122	8.4084e-13	3.00312e-12	17.9363
ZFHX4	-1.23774	7.93422	7.70703	6.24013e-14	2.41653e-13	20.4922
UGT2B4	-1.23783	1.52346	4.51495	7.78464e-06	1.62996e-05	2.33148
NOSTRIN	-1.23951	8.2941	5.87399	7.45275e-09	1.99969e-08	9.04646
TTBK2	-1.23951	6.9422	10.1946	1.95818e-22	1.308e-21	39.8231
SLC35F1	-1.24139	3.50139	9.41819	1.3348e-19	7.45714e-19	33.3685
RFTN2	-1.24191	6.06683	10.5281	1.06905e-23	7.66993e-23	42.7026
EYA1	-1.24296	3.33631	4.63605	4.46109e-06	9.52929e-06	2.86464
NAP1L5	-1.24435	6.72447	11.2189	2.1489e-26	1.79933e-25	48.8564
PEG10	-1.24446	10.3444	3.44293	0.000620187	0.00107233	-1.80873
COBLL1	-1.24483	9.63225	10.887	4.37711e-25	3.40707e-24	45.8687
SERPINB13	-1.24491	0.552043	8.24874	1.23382e-15	5.34709e-15	24.3548
COL21A1	-1.24617	5.16619	6.37074	4.03876e-10	1.20118e-09	11.8884
MYL3	-1.24638	1.62746	8.52004	1.60464e-16	7.36568e-16	26.3657
TIPARP	-1.24667	9.81289	12.1005	5.52441e-30	5.6598e-29	57.0564
TMCC3	-1.24698	7.93681	10.1832	2.16036e-22	1.43856e-21	39.7258
ANKAR	-1.24829	4.80414	13.1427	2.03039e-34	2.67906e-33	67.1957
TLE2	-1.25007	8.79098	9.41019	1.4249e-19	7.94753e-19	33.3039
ZCCHC12	-1.25022	2.06247	10.0996	4.43207e-22	2.87858e-21	39.0145
STEAP2	-1.25057	8.94834	6.32565	5.30456e-10	1.56435e-09	11.6222
FLRT3	-1.25109	6.44865	4.53685	7.04558e-06	1.48064e-05	2.42692
CRY2	-1.25118	9.92893	15.6447	9.38699e-46	2.19799e-44	93.1424
AGXT	-1.25138	0.739067	8.01153	7.05043e-15	2.90631e-14	22.6379
RASSF10	-1.25146	4.48809	4.55526	6.47669e-06	1.36376e-05	2.5075
GABRG1	-1.25156	0.718788	11.9693	1.93492e-29	1.93267e-28	55.8125
LIPC	-1.25188	2.47162	8.68042	4.69621e-17	2.23468e-16	27.5778
KCTD8	-1.25304	0.766029	11.4891	1.77298e-27	1.577e-26	51.3305
PPP1R3G	-1.25456	3.48411	9.38173	1.79751e-19	9.9739e-19	33.0743
FLI1	-1.25456	8.58441	12.4161	2.63159e-31	2.91191e-30	60.0782
TLR3	-1.25638	7.40427	9.06126	2.37576e-18	1.22505e-17	30.5236
TNFRSF11A	-1.25724	6.06714	8.21056	1.63763e-15	7.02781e-15	24.0758
DCD	-1.25895	1.93876	3.16264	0.00165154	0.00273185	-2.71577
PRSS21	-1.25972	3.54852	3.97393	8.03224e-05	0.000152411	0.110542
TNNC2	-1.26111	1.98333	7.65938	8.72583e-14	3.35037e-13	20.1625
MAGI1	-1.26145	9.44878	13.1385	2.11763e-34	2.78986e-33	67.1539
OBP2B	-1.26198	3.56172	3.1751	0.0015835	0.00262462	-2.67703
STXBP1	-1.26219	9.09971	11.0752	7.97828e-26	6.5056e-25	47.5559
CYP4X1	-1.26221	8.38549	3.74579	0.000199211	0.00036247	-0.746043
GUCY1A3	-1.2623	10.1312	9.04614	2.67921e-18	1.37737e-17	30.4049
RPS6KA3	-1.26294	9.76794	11.6592	3.62431e-28	3.33623e-27	52.9052
MAP2K6	-1.26298	6.65032	9.07747	2.08809e-18	1.08159e-17	30.6511
IRF4	-1.26355	6.14352	5.45896	7.31902e-08	1.82152e-07	6.82807
FAM124B	-1.26356	5.2074	10.0064	9.8265e-22	6.22878e-21	38.2264
SNX32	-1.26376	1.77415	7.40097	5.22893e-13	1.8976e-12	18.4028
RPL21	-1.26399	2.27864	10.1043	4.25445e-22	2.76951e-21	39.0549
PDGFRL	-1.26506	8.7452	8.04654	5.46412e-15	2.26956e-14	22.8889
LRRK2	-1.26526	7.67842	8.01156	7.04868e-15	2.90629e-14	22.6382
MEIS1	-1.26537	7.35961	10.744	1.57569e-24	1.18661e-23	44.5994
ARL10	-1.26579	4.79036	9.60064	2.97343e-20	1.72528e-19	34.8532
MYH2	-1.266	0.670534	10.7514	1.47578e-24	1.11529e-23	44.6643
NHSL2	-1.26634	5.95951	7.88441	1.76581e-14	7.0814e-14	21.7342
MBNL2	-1.2671	10.5972	11.7579	1.43246e-28	1.352e-27	53.8261
MEF2C	-1.26796	9.20128	13.5525	3.25434e-36	4.7111e-35	71.3023
FAM153A	-1.26831	1.09754	9.47909	8.1037e-20	4.58407e-19	33.8618
PCDHB11	-1.26848	4.47166	7.42886	4.32007e-13	1.57612e-12	18.5903
RAG1	-1.26849	4.75717	10.3116	7.1101e-23	4.88837e-22	40.8261
APOBEC3C	-1.26955	7.55384	10.0288	8.11798e-22	5.16298e-21	38.4154
PCDHGB3	-1.27039	3.63423	7.79923	3.2465e-14	1.28037e-13	21.1349
KLHL10	-1.27133	1.4213	14.0544	1.89796e-38	3.08059e-37	76.4148
SVOPL	-1.27194	3.13073	5.32132	1.51365e-07	3.68105e-07	6.12444
MRVI1	-1.27211	8.5651	10.5881	6.29485e-24	4.58147e-23	43.2272
C14orf132	-1.27299	8.65581	6.75209	3.78182e-11	1.21432e-10	14.2043
ARRDC4	-1.27435	9.07329	12.0637	7.85797e-30	7.98847e-29	56.7068
COL27A1	-1.27512	7.19834	7.09877	3.99174e-12	1.36265e-11	16.4077
GALR1	-1.2752	0.541332	14.522	1.45911e-40	2.63531e-39	81.2543
CH25H	-1.2754	5.26702	7.13098	3.22452e-12	1.10825e-11	16.6171
OMD	-1.27542	7.53706	5.62599	2.968e-08	7.61321e-08	7.70349
ODAM	-1.27644	1.1661	5.75271	1.47395e-08	3.8588e-08	8.38334
BCL6	-1.27683	10.2111	13.0982	3.16606e-34	4.14246e-33	66.7544
PCDHB12	-1.27784	4.93223	9.84738	3.78172e-21	2.31578e-20	36.8929
MFNG	-1.27814	7.34518	11.0414	1.08436e-25	8.78765e-25	47.2518
SLC16A4	-1.27974	7.51968	8.11962	3.20159e-15	1.34862e-14	23.4154
CHST4	-1.28041	2.03516	5.32037	1.52122e-07	3.69839e-07	6.11962
TMEM74	-1.2805	1.71049	8.37161	4.92829e-16	2.18893e-15	25.2593
FMNL2	-1.2805	9.45629	10.2638	1.07639e-22	7.31827e-22	40.4155
FBXO17	-1.28087	6.97592	8.23782	1.33808e-15	5.78573e-15	24.2749
ELMOD3	-1.28146	8.55484	17.8521	2.42898e-56	1.05133e-54	117.4
CGNL1	-1.28147	9.45851	8.00614	7.33158e-15	3.02003e-14	22.5994
P2RY13	-1.28255	6.27861	8.19679	1.81324e-15	7.76004e-15	23.9754
FFAR3	-1.28356	1.96647	8.8158	1.64311e-17	8.01907e-17	28.6142
OLFML1	-1.28415	8.02464	10.2211	1.55669e-22	1.04675e-21	40.0502
IL7	-1.28475	4.27033	8.63174	6.83137e-17	3.2097e-16	27.2081
WDR27	-1.28508	6.67933	12.6559	2.52992e-32	2.94384e-31	62.4035
SLC26A5	-1.28509	1.71751	6.97864	8.78937e-12	2.93264e-11	15.6338
ATP6V0A4	-1.28523	5.08314	3.73701	0.000206115	0.000374476	-0.778068
ITSN1	-1.28551	9.83984	15.7965	1.81543e-46	4.41995e-45	94.7768
SEC16B	-1.2863	6.88116	9.61562	2.62613e-20	1.52894e-19	34.976
RBPMS	-1.2867	9.94202	11.3427	6.88378e-27	5.91715e-26	49.9852
FAM47E	-1.2871	6.42709	7.03859	5.93571e-12	1.99996e-11	16.0186
CCDC50	-1.28725	10.5079	18.9032	1.63909e-61	9.58839e-60	129.252
STAT5B	-1.28738	10.718	16.1258	5.05029e-48	1.33378e-46	98.3404
TAS1R1	-1.28764	1.65072	9.26355	4.69137e-19	2.53021e-18	32.1262
SKAP2	-1.28775	9.33969	12.2222	1.71745e-30	1.81487e-29	58.2161
GJC2	-1.28822	4.2532	10.1457	2.98257e-22	1.96167e-21	39.4065
CARD6	-1.28874	7.59143	11.8781	4.60156e-29	4.4915e-28	54.9528
DNAJC18	-1.28899	6.99867	16.7009	9.14028e-51	2.75818e-49	104.623
SOCS3	-1.28907	10.035	8.47304	2.29276e-16	1.04156e-15	26.0138
RTN1	-1.28989	7.83113	6.25383	8.16199e-10	2.36312e-09	11.2016
RNF183	-1.29042	3.72007	4.49679	8.45355e-06	1.76485e-05	2.25264
SEMA3C	-1.29092	11.5161	7.6923	6.92278e-14	2.67244e-13	20.3901
AKT3	-1.29154	9.10292	9.26716	4.55664e-19	2.46142e-18	32.155
DLL1	-1.29166	6.61777	10.4127	2.94426e-23	2.05642e-22	41.6992
ATP8A1	-1.29293	8.04028	8.1555	2.45907e-15	1.04225e-14	23.6753
PCDHB3	-1.29392	5.52648	6.6121	9.13877e-11	2.84694e-10	13.3408
SNX31	-1.29421	1.16584	9.21614	6.8773e-19	3.66532e-18	31.7483
RNF217	-1.2947	5.96392	8.75657	2.60521e-17	1.25572e-16	28.1593
C2CD4C	-1.29558	3.53069	6.83332	2.2512e-11	7.33147e-11	14.7122
IL1R1	-1.29602	10.4703	9.1534	1.13834e-18	6.01456e-18	31.2504
ACSL4	-1.29654	9.65986	10.8409	6.62474e-25	5.10328e-24	45.458
CELF6	-1.29683	5.0043	9.66363	1.76238e-20	1.03769e-19	35.3704
VIM	-1.29789	14.2739	11.8648	5.21884e-29	5.06804e-28	54.8279
CYP4B1	-1.29832	7.19374	3.79293	0.000165738	0.000303824	-0.572996
SYT2	-1.29856	3.12985	11.0797	7.65985e-26	6.25488e-25	47.5963
CPE	-1.29862	10.8787	8.51067	1.72324e-16	7.89532e-16	26.2954
OR52N4	-1.29967	1.07598	12.4482	1.92577e-31	2.13919e-30	60.3882
LGALS4	-1.30018	1.61981	11.0185	1.33473e-25	1.07607e-24	47.0458
MAS1L	-1.30021	0.650768	14.0242	2.594e-38	4.16693e-37	76.1043
SCRN2	-1.3005	8.46998	11.2045	2.45146e-26	2.04667e-25	48.7258
PHLDB2	-1.30175	9.35907	9.40541	1.48163e-19	8.25324e-19	33.2653
AREG	-1.30221	7.56367	4.0839	5.10137e-05	9.88889e-05	0.540476
ACSM2A	-1.30353	0.415236	15.3614	1.97965e-44	4.32795e-43	90.1099
GRK5	-1.30488	7.85456	14.0081	3.06281e-38	4.89707e-37	75.9392
FBXO2	-1.30522	7.24422	6.05692	2.60568e-09	7.23613e-09	10.0697
LIMCH1	-1.30527	10.5313	8.63141	6.84877e-17	3.21699e-16	27.2055
OLFML2A	-1.30607	9.74955	12.1671	2.9172e-30	3.04327e-29	57.6902
GJB7	-1.30617	1.13892	7.19932	2.04485e-12	7.10783e-12	17.0639
MCOLN3	-1.30637	5.65186	6.14738	1.53455e-09	4.34664e-09	10.5857
SGCZ	-1.30666	0.380747	16.29	8.38145e-49	2.28755e-47	100.127
MPDZ	-1.30795	9.68634	13.6362	1.38833e-36	2.04433e-35	72.1488
C20orf194	-1.30838	8.88255	16.8066	2.83855e-51	8.84596e-50	105.787
KIF17	-1.30865	4.40056	11.4779	1.96802e-27	1.74415e-26	51.227
KCNJ8	-1.30883	7.65817	11.5812	7.51669e-28	6.81312e-27	52.1816
ECHDC1	-1.30917	9.49646	11.5846	7.28224e-28	6.60761e-27	52.2131
ATP8B4	-1.30953	6.27634	10.4203	2.75351e-23	1.9287e-22	41.7655
C21orf62	-1.30981	1.08948	12.9879	9.50815e-34	1.20808e-32	65.6621
ARHGAP24	-1.3106	7.68182	13.2188	9.46792e-35	1.27079e-33	67.9535
WNT10B	-1.31076	2.90183	7.80311	3.15791e-14	1.24744e-13	21.1621
CYP7B1	-1.31118	6.65949	7.98086	8.80725e-15	3.60536e-14	22.4189
TSKS	-1.31123	0.994415	12.2284	1.61776e-30	1.71586e-29	58.2754
CPNE8	-1.31225	7.07211	10.0971	4.52775e-22	2.93849e-21	38.9933
TGM1	-1.31405	3.82313	6.72527	4.48367e-11	1.4295e-10	14.0376
KPNA5	-1.3141	6.20717	12.5126	1.02827e-31	1.16104e-30	61.0111
SHROOM4	-1.31431	8.1258	12.3663	4.26687e-31	4.67012e-30	59.5984
CHRNB2	-1.31611	4.34498	4.95738	9.58708e-07	2.16927e-06	4.34222
NFIX	-1.31826	11.149	9.25174	5.16105e-19	2.77479e-18	32.0319
SEC14L5	-1.31847	3.59077	6.84758	2.05415e-11	6.70758e-11	14.8019
CDH3	-1.31891	9.67073	5.44485	7.89074e-08	1.95897e-07	6.75519
WNK2	-1.31973	8.36119	7.57637	1.5591e-13	5.87836e-13	19.5918
PPM1F	-1.31976	9.30756	17.2011	3.55754e-53	1.26245e-51	110.145
DCLK1	-1.32077	8.82434	5.75556	1.4507e-08	3.80024e-08	8.39879
TCP11L2	-1.32122	7.20086	13.4349	1.0719e-35	1.50717e-34	70.1179
KLF11	-1.32124	9.28009	15.9201	4.74883e-47	1.18825e-45	96.1109
LTBP2	-1.32239	11.7663	10.2978	8.01122e-23	5.4881e-22	40.7079
TTN	-1.32281	6.90994	10.613	5.05133e-24	3.70157e-23	43.4452
TIE1	-1.32286	8.76689	12.1759	2.68105e-30	2.80373e-29	57.774
CCND2	-1.32319	9.49301	11.3945	4.26489e-27	3.70879e-26	50.46
CLU	-1.32483	13.1895	6.96752	9.45071e-12	3.14534e-11	15.5626
SORCS1	-1.32491	4.57903	3.54704	0.000423557	0.000744362	-1.45307
P2RY14	-1.32499	5.22185	10.3228	6.44658e-23	4.44109e-22	40.9231
AFAP1L1	-1.32663	7.88028	13.0823	3.71229e-34	4.82035e-33	66.5963
EMILIN2	-1.32739	8.07435	10.1875	2.08046e-22	1.38697e-21	39.7631
PCP4L1	-1.3278	3.79643	5.39789	1.01228e-07	2.49288e-07	6.51389
ECHDC3	-1.32833	8.16373	9.85666	3.49731e-21	2.14622e-20	36.9702
MARK1	-1.32843	7.14997	7.20697	1.94276e-12	6.76257e-12	17.1142
TPPP3	-1.32852	7.72632	7.76017	4.28488e-14	1.67601e-13	20.8619
B3GALT2	-1.32901	2.63647	10.2723	9.99518e-23	6.81453e-22	40.4889
OR7C1	-1.32952	0.916144	11.2016	2.51708e-26	2.09736e-25	48.6996
CEP68	-1.3297	9.62829	22.8664	2.17826e-81	7.46708e-79	174.823
RCBTB2	-1.32974	8.13507	16.7447	5.63133e-51	1.72052e-49	105.105
MECOM	-1.33061	7.94701	11.0824	7.47442e-26	6.10637e-25	47.6206
GLT1D1	-1.33068	2.428	8.96731	5.00272e-18	2.52493e-17	29.7882
LPAR6	-1.33212	9.31922	14.4453	3.25885e-40	5.8063e-39	80.4554
GRIA2	-1.33332	3.86099	2.94842	0.00333261	0.005322	-3.35896
FGD4	-1.33495	8.49916	14.8917	2.96413e-42	5.83298e-41	85.1285
FAM46B	-1.33559	7.96036	6.8303	2.29522e-11	7.47058e-11	14.6932
GFRA3	-1.33629	2.39741	5.18994	2.98488e-07	7.06252e-07	5.4679
LMO2	-1.33647	7.97135	14.5445	1.15287e-40	2.09546e-39	81.4885
KLHL21	-1.33661	9.99992	14.1884	4.73926e-39	7.9327e-38	77.794
CLEC4M	-1.33668	0.666003	11.067	8.59712e-26	6.99026e-25	47.4819
ACSL5	-1.33697	8.73283	8.94157	6.12909e-18	3.07621e-17	29.5877
CD1C	-1.33733	4.46748	5.6384	2.77284e-08	7.12861e-08	7.76952
PCDHGB4	-1.33854	5.13147	6.16147	1.41225e-09	4.01225e-09	10.6667
PTPRT	-1.3388	8.2234	3.38467	0.000764554	0.00131071	-2.00336
FIGNL2	-1.34094	4.07464	12.2145	1.85012e-30	1.95265e-29	58.1422
EMX2	-1.34134	4.18728	8.13985	2.75923e-15	1.16601e-14	23.5618
CYP3A5	-1.34225	2.8604	8.66836	5.15403e-17	2.45049e-16	27.486
ULBP3	-1.34228	3.7886	6.66254	6.6615e-11	2.09693e-10	13.6502
WNK3	-1.34252	3.99486	6.64819	7.28992e-11	2.2875e-10	13.562
ACCS	-1.34398	7.33704	12.6319	3.20258e-32	3.69893e-31	62.1694
TCF7	-1.34412	8.16462	8.79022	2.00564e-17	9.7412e-17	28.4174
DSCAML1	-1.34414	3.15123	5.72829	1.68848e-08	4.40563e-08	8.25129
SERPING1	-1.34431	12.4296	10.8643	5.36977e-25	4.15521e-24	45.6661
PRICKLE2	-1.34514	9.39543	10.4691	1.79658e-23	1.2735e-22	42.1884
LRRN1	-1.34521	8.06716	5.31832	1.53756e-07	3.73706e-07	6.10928
ALAS2	-1.34587	0.5795	11.9453	2.43148e-29	2.41458e-28	55.5858
TMEM200B	-1.34958	6.2882	7.13549	3.12924e-12	1.07615e-11	16.6465
ACSS2	-1.35037	9.85199	16.8498	1.76111e-51	5.57956e-50	106.262
DFNB59	-1.35078	4.36893	12.373	3.99843e-31	4.37911e-30	59.6629
CD248	-1.35112	9.67072	10.7451	1.56107e-24	1.17664e-23	44.6086
PPP1R15A	-1.35136	9.93057	13.4449	9.69394e-36	1.3664e-34	70.2177
HSPA12A	-1.35168	8.049	10.1925	1.99338e-22	1.33047e-21	39.8054
HSD17B11	-1.35202	8.73666	12.2625	1.16471e-30	1.24459e-29	58.6016
IL17D	-1.35233	3.81148	9.52958	5.34907e-20	3.0653e-19	34.2725
SESN3	-1.35241	7.08504	6.61959	8.72106e-11	2.72126e-10	13.3866
DMRT3	-1.35328	3.7839	9.24058	5.64746e-19	3.02776e-18	31.9429
DDX25	-1.354	1.25138	8.32326	7.08016e-16	3.11244e-15	24.9022
OXER1	-1.3543	4.0075	8.5529	1.24921e-16	5.76661e-16	26.6127
ME3	-1.35662	7.32981	9.88317	2.79588e-21	1.7269e-20	37.1917
KCND3	-1.35734	5.19351	4.97729	8.6908e-07	1.9722e-06	4.43677
NLGN3	-1.35751	4.65186	12.2951	8.49777e-31	9.14898e-30	58.9145
PADI2	-1.35755	9.75861	5.653	2.55934e-08	6.6045e-08	7.84731
SLC5A9	-1.35764	2.85018	9.52445	5.57986e-20	3.18796e-19	34.2308
KLHL32	-1.35822	2.8594	9.67362	1.62179e-20	9.58533e-20	35.4526
LIMS3	-1.35857	2.56103	10.2094	1.72335e-22	1.15474e-21	39.9495
COX6B2	-1.3586	2.72223	6.26305	7.72445e-10	2.24136e-09	11.2553
PCDHB15	-1.35889	4.80388	12.0112	1.29814e-29	1.3073e-28	56.2086
DAB2IP	-1.35913	10.0859	15.5496	2.6185e-45	5.99214e-44	92.122
ZEB2	-1.36015	9.46976	11.967	1.97677e-29	1.97221e-28	55.7913
FMO1	-1.36106	6.8787	6.59958	9.88222e-11	3.07463e-10	13.2643
SLC22A11	-1.36254	1.25603	10.5668	7.5988e-24	5.49318e-23	43.0407
FABP5	-1.36303	6.11837	7.3653	6.66987e-13	2.40172e-12	18.1637
GNRH1	-1.36309	4.50403	10.8672	5.228e-25	4.05099e-24	45.6927
JAM3	-1.36383	9.12305	12.676	2.0779e-32	2.43108e-31	62.5989
CFP	-1.36403	4.12894	7.64817	9.44055e-14	3.61185e-13	20.085
ID1	-1.36509	7.45322	9.85807	3.45599e-21	2.12314e-20	36.982
TGFA	-1.36581	7.18546	7.24897	1.46562e-12	5.15298e-12	17.3908
PGAP1	-1.36898	8.09242	10.5621	7.92115e-24	5.7238e-23	42.9996
KBTBD11	-1.36906	6.70742	8.15586	2.45256e-15	1.04e-14	23.6779
TPM2	-1.3697	10.5133	9.28016	4.10187e-19	2.22347e-18	32.2589
GALNT12	-1.36975	5.74108	7.97031	9.50655e-15	3.88513e-14	22.3437
BPI	-1.36994	1.91993	5.12386	4.17745e-07	9.73771e-07	5.14328
FAM43A	-1.36994	7.19049	14.0514	1.95943e-38	3.17435e-37	76.3832
MIA2	-1.37063	0.739445	8.91509	7.5502e-18	3.7685e-17	29.3818
C17orf51	-1.3707	7.04781	11.4056	3.84927e-27	3.35588e-26	50.5616
ETV1	-1.37139	8.0578	10.458	1.98009e-23	1.40069e-22	42.0921
GRIP2	-1.37197	2.79728	9.38425	1.76094e-19	9.77729e-19	33.0946
OLAH	-1.37218	1.17842	6.66102	6.72575e-11	2.11599e-10	13.6408
HCN1	-1.37299	1.64873	8.15141	2.53421e-15	1.07277e-14	23.6456
KCNC4	-1.37466	6.98252	11.5589	9.25847e-28	8.34333e-27	51.9749
TRIM9	-1.37491	5.59021	6.81955	2.45903e-11	7.98405e-11	14.6257
PARM1	-1.37665	9.25169	8.99623	3.98043e-18	2.02327e-17	30.014
CHRM3	-1.37687	3.31043	6.04277	2.82897e-09	7.83463e-09	9.98956
ACSS3	-1.37845	7.90513	7.3682	6.53924e-13	2.35715e-12	18.1832
CDH13	-1.37905	8.38529	13.4518	9.03812e-36	1.27606e-34	70.2873
PELI1	-1.37937	9.39144	12.278	1.00263e-30	1.07541e-29	58.7503
STBD1	-1.37943	8.96152	12.8695	3.07998e-33	3.80064e-32	64.4947
DPF3	-1.37993	3.39911	7.90818	1.48855e-14	6.00608e-14	21.9023
C1QTNF1	-1.38034	8.88071	10.171	2.39871e-22	1.59048e-21	39.6222
SOX15	-1.38076	3.93649	6.7323	4.28816e-11	1.36972e-10	14.0813
ISLR2	-1.38231	4.84675	9.79066	6.09433e-21	3.68975e-20	36.4208
LIF	-1.3825	6.8259	7.96933	9.57427e-15	3.91187e-14	22.3367
B4GALT6	-1.3827	6.19009	11.3708	5.3079e-27	4.59018e-26	50.243
BVES	-1.38398	6.14345	9.85409	3.57378e-21	2.19158e-20	36.9488
ACO1	-1.38459	9.96829	14.6404	4.21102e-41	7.84531e-40	82.4898
AFAP1L2	-1.3851	8.73385	10.2266	1.48474e-22	9.99153e-22	40.0971
KRT81	-1.38561	6.3867	3.591	0.000359543	0.000636629	-1.29986
LYPD6	-1.38627	7.46881	5.25559	2.12988e-07	5.12009e-07	5.79408
LIN7A	-1.38748	4.76969	5.17658	3.19577e-07	7.53861e-07	5.40195
KAT2B	-1.38776	8.49926	14.2512	2.46852e-39	4.21e-38	78.4424
DLGAP1	-1.38781	4.07612	4.71145	3.13441e-06	6.77476e-06	3.20318
ITGA6	-1.38826	11.279	9.89374	2.55703e-21	1.58279e-20	37.28
A2M	-1.38829	13.7088	12.0215	1.17624e-29	1.18702e-28	56.3064
NLRP13	-1.38879	0.576924	11.3788	4.92942e-27	4.26718e-26	50.3164
TNNI2	-1.38964	2.86319	7.69988	6.56259e-14	2.53797e-13	20.4426
SPNS2	-1.39179	8.00731	9.7011	1.28978e-20	7.6733e-20	35.6792
TLR4	-1.39206	8.80344	11.9731	1.86609e-29	1.865e-28	55.8484
CLCN4	-1.3933	6.39884	7.50632	2.53461e-13	9.43045e-13	19.1142
MPO	-1.39352	2.02426	10.1275	3.48755e-22	2.28504e-21	39.2517
EML5	-1.39483	5.36558	12.4484	1.92263e-31	2.13708e-30	60.3898
CHI3L2	-1.39583	7.85433	4.50544	8.12815e-06	1.69898e-05	2.29018
SLCO4A1	-1.39694	4.97127	6.7712	3.34897e-11	1.08019e-10	14.3233
PDZRN3	-1.39698	9.01986	10.1583	2.67674e-22	1.76935e-21	39.5136
ZNF354C	-1.397	5.67768	8.82478	1.53199e-17	7.49169e-17	28.6833
COL4A4	-1.39774	5.29592	6.90644	1.40528e-11	4.63111e-11	15.1739
IL6R	-1.39802	7.33202	9.52006	5.78579e-20	3.30341e-19	34.1949
MTMR8	-1.39869	2.84169	8.84398	1.31859e-17	6.4814e-17	28.8314
DZIP1L	-1.40023	5.62289	11.6769	3.06842e-28	2.84439e-27	53.0704
EGFL7	-1.40076	8.34977	10.3149	6.90874e-23	4.75375e-22	40.8545
PCDHGB5	-1.40132	6.66243	5.69847	1.992e-08	5.17787e-08	8.09069
CBLN1	-1.40178	3.05639	6.36013	4.30699e-10	1.2783e-09	11.8256
MCTP1	-1.40184	6.88011	9.7189	1.11159e-20	6.63393e-20	35.8263
GOLGA6L10	-1.4026	6.36091	14.1423	7.6459e-39	1.26253e-37	77.3186
CLIC2	-1.40285	7.98851	11.8526	5.85864e-29	5.67649e-28	54.7132
RGAG4	-1.40329	7.44926	9.98774	1.15188e-21	7.27726e-21	38.0692
CLEC14A	-1.4037	8.46223	13.2926	4.50808e-35	6.15194e-34	68.6907
REM1	-1.40424	4.28355	10.1332	3.31955e-22	2.1783e-21	39.3006
TBC1D4	-1.4049	10.0027	14.1071	1.10055e-38	1.80685e-37	76.9565
PLLP	-1.40494	6.65933	9.03401	2.95013e-18	1.51257e-17	30.3098
WFIKKN2	-1.40532	1.37589	9.62232	2.48414e-20	1.45021e-19	35.031
IFNE	-1.40611	1.03163	12.2579	1.21766e-30	1.29712e-29	58.5574
ZDHHC2	-1.40686	8.06134	9.77987	6.67243e-21	4.03263e-20	36.3311
ZFP36L2	-1.40896	11.9879	13.2305	8.41979e-35	1.13455e-33	68.0701
IL12A	-1.40898	2.90641	7.1226	3.40891e-12	1.16927e-11	16.5625
C10orf105	-1.40933	3.0444	10.7266	1.84036e-24	1.37987e-23	44.4456
PER2	-1.40952	9.64424	16.0517	1.13341e-47	2.93012e-46	97.5362
SCNN1B	-1.41001	7.07263	5.28556	1.82353e-07	4.40031e-07	5.94426
PARD3B	-1.41006	6.30792	9.30554	3.33972e-19	1.8236e-18	32.462
FAT1	-1.41066	11.5646	8.87128	1.0649e-17	5.27222e-17	29.0423
MAP1B	-1.41084	10.2432	10.1701	2.41746e-22	1.60168e-21	39.6145
MAP3K8	-1.41088	7.57425	10.7553	1.42568e-24	1.07886e-23	44.6985
B3GALT5	-1.41139	4.68067	4.81921	1.8769e-06	4.13709e-06	3.69576
DPYD	-1.4116	8.9059	12.0595	8.18086e-30	8.29704e-29	56.6668
ARHGEF37	-1.41191	9.28033	10.9521	2.435e-25	1.93132e-24	46.4499
VAT1L	-1.413	3.8261	8.02772	6.26704e-15	2.59086e-14	22.7539
FGL2	-1.41326	9.35538	9.38078	1.81153e-19	1.00452e-18	33.0666
USP53	-1.41327	9.7912	14.2955	1.55607e-39	2.66977e-38	78.9011
GABARAPL1	-1.41354	9.87177	15.8209	1.39449e-46	3.40963e-45	95.0392
AIFM2	-1.41605	8.5292	13.4247	1.18934e-35	1.66955e-34	70.0146
KLRB1	-1.41696	4.75773	6.45535	2.41129e-10	7.27247e-10	12.3923
C2CD2	-1.41705	9.5436	13.05	5.12687e-34	6.6071e-33	66.2756
PCDHGA11	-1.41756	4.40621	10.4004	3.27796e-23	2.28206e-22	41.5929
SDK1	-1.41856	7.52587	7.96898	9.5984e-15	3.92079e-14	22.3342
MAP3K15	-1.41862	1.05741	12.749	1.01309e-32	1.20922e-31	63.3123
ZNF391	-1.41911	4.86269	9.55034	4.50711e-20	2.59148e-19	34.4419
HOXD9	-1.4197	6.18834	11.5986	6.39017e-28	5.82284e-27	52.3427
KCNJ12	-1.42022	4.59476	7.93461	1.23044e-14	4.98576e-14	22.0897
DRD1	-1.42038	2.09248	7.1194	3.48194e-12	1.19289e-11	16.5417
NXNL1	-1.42088	0.50711	17.0836	1.31596e-52	4.47532e-51	108.843
PLTP	-1.42378	10.1153	10.6713	3.01197e-24	2.23679e-23	43.9575
SIRPA	-1.42403	10.2091	13.5287	4.14434e-36	5.96423e-35	71.0621
NFATC2	-1.42428	6.11545	8.18455	1.98485e-15	8.47542e-15	23.8864
ANO4	-1.42703	2.03918	8.66579	5.2571e-17	2.49724e-16	27.4665
HGF	-1.42815	5.63047	8.94554	5.94056e-18	2.98508e-17	29.6186
ARAP3	-1.42914	8.05311	15.0784	4.07699e-43	8.39899e-42	87.1013
CDC14A	-1.42948	7.51739	8.92023	7.25103e-18	3.62129e-17	29.4217
RADIL	-1.42998	5.59225	7.80728	3.06565e-14	1.21264e-13	21.1913
VIPR1	-1.43105	7.89805	9.32815	2.77996e-19	1.52524e-18	32.6433
MYLK4	-1.43112	4.62423	11.6528	3.8491e-28	3.53745e-27	52.8455
NPTX1	-1.4314	3.76428	6.0898	2.15112e-09	6.01767e-09	10.2565
DMRTC1B	-1.43188	2.92504	6.56701	1.21041e-10	3.73809e-10	13.066
RBPMS2	-1.43235	5.77944	9.74349	9.05007e-21	5.42751e-20	36.0296
PCDHGA7	-1.43248	4.41838	7.48826	2.8711e-13	1.06355e-12	18.9918
PTGDR	-1.43442	3.74306	9.2543	5.05554e-19	2.71977e-18	32.0523
NPY1R	-1.43454	8.77632	3.30561	0.0010108	0.0017123	-2.26235
FAM124A	-1.43472	4.67589	10.5792	6.81156e-24	4.94494e-23	43.1491
RRAGD	-1.43473	8.13269	10.3063	7.43981e-23	5.10277e-22	40.7812
KALRN	-1.43604	7.97561	10.3352	5.7886e-23	4.0039e-22	41.0297
STON1	-1.43645	8.16736	11.2604	1.46776e-26	1.23989e-25	49.2344
PDE1B	-1.43655	6.80812	10.8965	4.01963e-25	3.13736e-24	45.9531
ANO1	-1.43662	11.2339	8.52384	1.55888e-16	7.16142e-16	26.3942
KLF6	-1.43673	11.8702	14.8286	5.78114e-42	1.12601e-40	84.4643
IRX2	-1.43733	8.84603	6.31869	5.53172e-10	1.62631e-09	11.5812
ETV5	-1.43737	8.62703	12.4097	2.80152e-31	3.09195e-30	60.016
CHI3L1	-1.43768	9.23467	5.10115	4.68523e-07	1.08814e-06	5.03256
PPARGC1B	-1.43806	4.08072	9.84876	3.73803e-21	2.29066e-20	36.9044
ETS2	-1.43846	10.0714	14.661	3.39012e-41	6.3366e-40	82.7054
CTF1	-1.43992	6.53163	8.20773	1.67225e-15	7.17278e-15	24.0552
PNLIPRP3	-1.44059	0.92067	5.94784	4.89183e-09	1.33406e-08	9.4562
DNAJB4	-1.44093	8.56681	17.486	1.47727e-54	5.61427e-53	113.312
PLD1	-1.44188	8.29736	11.3245	8.14009e-27	6.97606e-26	49.819
BICC1	-1.44237	7.10407	7.57729	1.54916e-13	5.84215e-13	19.5981
KANK4	-1.4426	7.53986	6.20635	1.08286e-09	3.10735e-09	10.9258
FCGBP	-1.44401	8.8419	6.10951	1.91688e-09	5.38877e-09	10.3689
GRIK3	-1.44416	7.43687	4.367	1.51103e-05	3.08286e-05	1.69789
POU6F1	-1.44511	7.25143	16.3729	3.37827e-49	9.41522e-48	101.031
EZH1	-1.44646	9.52994	18.9534	9.25578e-62	5.47049e-60	129.821
TWIST1	-1.44746	6.84556	9.08521	1.96329e-18	1.02065e-17	30.712
SYNPO	-1.44797	10.5778	13.5876	2.27757e-36	3.32517e-35	71.6569
PECAM1	-1.44909	10.0642	14.6216	5.12729e-41	9.47002e-40	82.2941
RNF125	-1.44921	7.95681	13.5221	4.43355e-36	6.36975e-35	70.995
JPH4	-1.44951	3.62101	10.9882	1.75625e-25	1.4073e-24	46.7738
GABRB3	-1.44989	4.92024	4.44995	1.04419e-05	2.16335e-05	2.05072
GRID1	-1.45085	5.32681	10.8225	7.81416e-25	6.00334e-24	45.2944
FXYD6	-1.45169	8.70886	11.8304	7.22933e-29	6.96911e-28	54.5046
RAB6B	-1.45183	7.23091	9.92943	1.89014e-21	1.17807e-20	37.5791
NR0B1	-1.4524	0.713888	8.51986	1.60691e-16	7.37413e-16	26.3643
MYC	-1.45338	10.694	9.63409	2.25303e-20	1.31708e-19	35.1275
ZNF454	-1.45459	4.00174	10.0822	5.14205e-22	3.32333e-21	38.8674
ANKRD20A3	-1.45664	2.65005	8.77018	2.34387e-17	1.13358e-16	28.2636
MT1A	-1.45692	3.27668	5.57067	4.01224e-08	1.01881e-07	7.41094
PDGFA	-1.45795	8.30632	14.8788	3.3976e-42	6.65542e-41	84.9928
PLIN5	-1.45884	6.14375	4.99497	7.96365e-07	1.81271e-06	4.52097
ZNF423	-1.45963	7.30366	10.1983	1.89658e-22	1.26784e-21	39.8547
TBX18	-1.45978	6.35734	9.17768	9.36908e-19	4.9717e-18	31.4428
PYGO1	-1.46001	3.86306	8.8814	9.83654e-18	4.87962e-17	29.1207
SLC38A3	-1.46124	4.99054	5.73028	1.66997e-08	4.35931e-08	8.26201
MPP6	-1.46137	5.42001	7.94688	1.12619e-14	4.57849e-14	22.1769
CSRP1	-1.46335	12.5843	16.2275	1.66172e-48	4.49241e-47	99.4464
C4BPB	-1.46386	2.37137	6.06808	2.44182e-09	6.79651e-09	10.133
TEF	-1.46411	9.11605	14.7795	9.7075e-42	1.86951e-40	83.9489
FGF17	-1.46612	0.831466	15.923	4.5995e-47	1.15257e-45	96.1427
DNAH1	-1.46638	6.93054	13.738	4.90989e-37	7.42113e-36	73.1817
FAM180A	-1.46798	5.52323	8.46851	2.37288e-16	1.0771e-15	25.9799
C3	-1.46876	12.9781	8.86795	1.09305e-17	5.40847e-17	29.0166
CPA2	-1.46896	0.726525	12.8551	3.55323e-33	4.36576e-32	64.3528
DDIT4L	-1.46905	5.01148	7.48736	2.88899e-13	1.06995e-12	18.9857
CYP8B1	-1.46961	1.6769	8.46352	2.4643e-16	1.1177e-15	25.9426
NODAL	-1.47006	2.1619	13.6492	1.21602e-36	1.79832e-35	72.2805
CA11	-1.47045	6.45533	8.04188	5.65292e-15	2.34546e-14	22.8555
TMOD2	-1.47047	8.39686	12.6912	1.78851e-32	2.09679e-31	62.7478
RARRES2	-1.4709	9.14965	9.04197	2.76947e-18	1.42164e-17	30.3722
KCNB2	-1.47161	1.83086	8.1981	1.79575e-15	7.68711e-15	23.985
PTPRM	-1.47174	9.72195	13.2246	8.93132e-35	1.20159e-33	68.0115
LRMP	-1.47225	6.14612	10.0998	4.4219e-22	2.87306e-21	39.0167
TP53TG3B	-1.47265	1.47021	9.34858	2.35456e-19	1.29849e-18	32.8075
IQCA1	-1.4727	6.01843	6.82168	2.42566e-11	7.87869e-11	14.6391
C22orf23	-1.47287	5.22789	12.8454	3.91038e-33	4.78742e-32	64.2576
CLCNKB	-1.47287	1.55657	11.0886	7.05949e-26	5.78116e-25	47.6772
PCBP3	-1.47303	4.06478	7.34646	7.58196e-13	2.71758e-12	18.0379
GPAT2	-1.47388	5.02933	6.12921	1.70758e-09	4.81935e-09	10.4816
PDE1A	-1.47435	5.78453	10.617	4.87381e-24	3.57608e-23	43.4807
RASAL1	-1.47603	4.66441	4.96221	9.36167e-07	2.11911e-06	4.36514
C15orf52	-1.47695	7.98653	9.58472	3.39227e-20	1.96298e-19	34.7228
HUNK	-1.47731	6.64395	7.20495	1.96925e-12	6.85339e-12	17.1009
CYGB	-1.47824	7.83639	12.1594	3.14105e-30	3.26883e-29	57.6168
ZNF660	-1.48019	3.60339	12.8483	3.80078e-33	4.65657e-32	64.2859
UNC5C	-1.48109	5.15488	7.71699	5.81644e-14	2.25552e-13	20.5613
POF1B	-1.48111	6.02735	4.57566	5.89795e-06	1.24665e-05	2.59712
PGR	-1.48113	9.38926	3.67011	0.000266575	0.000478791	-1.01958
PNPLA2	-1.48179	10.8391	13.9285	6.95743e-38	1.09104e-36	75.1237
SCG3	-1.48437	1.80166	5.94537	4.96155e-09	1.35157e-08	9.44242
FLT4	-1.48451	7.86465	14.1745	5.47366e-39	9.1086e-38	77.6508
UGT2B15	-1.48512	3.95913	4.43177	1.13288e-05	2.33947e-05	1.97283
ARHGAP26	-1.48601	8.75517	11.7575	1.43803e-28	1.35652e-27	53.8223
FEZ1	-1.4863	6.61869	12.2131	1.87491e-30	1.97759e-29	58.129
PDZK1	-1.48759	6.61587	4.0051	7.07017e-05	0.000134962	0.231256
FAM171A1	-1.48862	8.43682	8.63524	6.64983e-17	3.12869e-16	27.2346
ANTXR2	-1.48891	9.6468	13.7391	4.85936e-37	7.35124e-36	73.192
ACSM1	-1.4892	4.618	5.67211	2.30398e-08	5.9689e-08	7.94938
CAB39L	-1.48953	9.47486	12.2579	1.21705e-30	1.29712e-29	58.5579
ZNF521	-1.48986	8.76111	10.1737	2.3444e-22	1.55628e-21	39.6449
TCF7L2	-1.49131	9.12973	12.4949	1.22191e-31	1.37245e-30	60.8398
CCDC80	-1.49219	11.5426	9.1494	1.17546e-18	6.20874e-18	31.2187
KLHDC7A	-1.49701	6.3515	3.99359	7.4118e-05	0.000141154	0.186595
SMTNL2	-1.49795	2.15121	8.06749	4.6897e-15	1.95528e-14	23.0394
PCDHGA4	-1.49816	5.11129	7.72818	5.37406e-14	2.08586e-13	20.6391
NWD1	-1.49851	4.07361	6.07872	2.29489e-09	6.40312e-09	10.1934
CDNF	-1.49883	4.77293	13.0084	7.75996e-34	9.89625e-33	65.8639
RASL11A	-1.49895	6.48173	10.5301	1.04987e-23	7.53548e-23	42.7205
PAX3	-1.49941	1.90992	8.22668	1.45332e-15	6.26506e-15	24.1935
LRRTM4	-1.49978	0.708238	12.9835	9.9349e-34	1.26043e-32	65.6185
PMP2	-1.5003	0.730494	9.9599	1.45957e-21	9.16374e-21	37.8349
CD200	-1.50057	8.06603	14.7573	1.22802e-41	2.34595e-40	83.7151
NEXN	-1.50065	7.94283	11.6694	3.29206e-28	3.04019e-27	53.0006
SGCA	-1.50068	2.06447	10.1882	2.06927e-22	1.38005e-21	39.7684
DIXDC1	-1.50082	9.54298	14.5181	1.51993e-40	2.74228e-39	81.2137
SLC9A9	-1.501	6.85381	12.719	1.36155e-32	1.61167e-31	63.0187
KLHL3	-1.5034	6.86376	13.6485	1.22462e-36	1.80949e-35	72.2735
SACS	-1.5035	8.81398	12.8371	4.24633e-33	5.19501e-32	64.1758
DIO3	-1.50518	3.29729	6.68256	5.87281e-11	1.85446e-10	13.7735
EYA2	-1.5053	7.9748	7.56088	1.7364e-13	6.52817e-13	19.486
ZBTB20	-1.50619	4.07736	11.0058	1.4972e-25	1.20253e-24	46.932
EYS	-1.50724	3.77561	11.4323	3.00503e-27	2.63593e-26	50.8072
SPATA22	-1.5075	1.15959	9.64653	2.03178e-20	1.19222e-19	35.2297
PLEKHA4	-1.50779	8.71695	9.60249	2.92811e-20	1.69955e-19	34.8683
MPL	-1.50892	3.9146	16.4344	1.72013e-49	4.90565e-48	101.703
BIN1	-1.50896	8.01199	11.1924	2.73739e-26	2.27872e-25	48.6164
PPARA	-1.50939	8.38394	12.4819	1.38693e-31	1.55271e-30	60.714
B3GNT5	-1.50959	7.59803	8.20076	1.76083e-15	7.54138e-15	24.0043
ADAMTS9	-1.51114	8.25879	10.908	3.62253e-25	2.83647e-24	46.0562
DYNC1I1	-1.51202	4.74302	8.63694	6.56356e-17	3.09064e-16	27.2475
RFX2	-1.51281	6.86667	11.6725	3.19742e-28	2.95917e-27	53.0295
LCA5	-1.51292	7.50971	13.884	1.09989e-37	1.70453e-36	74.6685
TRNP1	-1.51545	6.82174	10.1241	3.59089e-22	2.35095e-21	39.2228
RASL12	-1.51551	7.24561	12.7118	1.46021e-32	1.72726e-31	62.9492
S100A1	-1.51558	8.28098	4.95305	9.79361e-07	2.21396e-06	4.32169
FOXN3	-1.51574	10.3759	17.1	1.09663e-52	3.75926e-51	109.025
AKR1B15	-1.51611	2.52243	4.93246	1.0835e-06	2.44036e-06	4.22438
PALM	-1.51658	8.71699	8.72396	3.35472e-17	1.60884e-16	27.9097
DSEL	-1.51673	8.03359	9.6648	1.74527e-20	1.02797e-19	35.3801
NLRP1	-1.5178	7.85952	12.5292	8.74667e-32	9.90865e-31	61.1718
KLF2	-1.51808	8.73925	12.093	5.93964e-30	6.07794e-29	56.9845
KLRF1	-1.51898	2.40256	9.22318	6.49798e-19	3.46964e-18	31.8043
PKIA	-1.51918	5.68328	7.12594	3.33417e-12	1.14501e-11	16.5843
PRSS16	-1.51988	7.06849	5.9276	5.4923e-09	1.49189e-08	9.3435
ADRA2B	-1.52105	3.83912	10.1214	3.67451e-22	2.40294e-21	39.2
LCAT	-1.52177	5.42993	14.3611	7.85543e-40	1.37953e-38	79.5807
PPL	-1.52199	10.3709	11.4224	3.29405e-27	2.88356e-26	50.7161
TYRO3	-1.52262	7.64508	11.967	1.97681e-29	1.97221e-28	55.7912
GIMAP1	-1.52349	6.16865	10.9446	2.60363e-25	2.06221e-24	46.3836
COL7A1	-1.52351	7.21708	6.63804	7.76933e-11	2.43271e-10	13.4996
KLRC1	-1.52362	2.60732	7.82921	2.62167e-14	1.04307e-13	21.3453
IGDCC3	-1.52374	3.48709	4.8214	1.8573e-06	4.09548e-06	3.70585
RAI2	-1.52377	8.39496	7.86717	1.99826e-14	7.9949e-14	21.6125
TUB	-1.52388	7.64113	9.82812	4.44811e-21	2.71222e-20	36.7323
TMPRSS5	-1.52449	2.18605	8.77231	2.30548e-17	1.11532e-16	28.2799
CDH8	-1.52461	2.71946	9.14249	1.24234e-18	6.54788e-18	31.164
ZNF608	-1.52508	7.97201	9.22289	6.5131e-19	3.47556e-18	31.802
[truncated: 1,558 more rows]

## Sheet: lncRNA
genesymbol	logFC	AveExpr	t	P.Value	adj.P.Val	B
PP14571	1.8876	4.69385	-6.22944	9.45325e-10	4.08908e-09	11.0111
HOTAIR	1.70805	4.99947	-5.12834	4.08666e-07	1.40763e-06	5.11597
MUC2	1.47974	1.80861	-3.7856	0.000170606	0.000417535	-0.650035
C2orf48	1.43243	2.17229	-8.15498	2.47803e-15	2.19482e-14	23.6235
MAL2	1.34197	12.3759	-11.0553	9.66792e-26	1.49853e-24	47.3272
C15orf54	1.09204	1.36206	-10.0269	8.3174e-22	1.10503e-20	38.3508
DLEU2	1.08393	5.38068	-9.23222	6.0777e-19	7.53635e-18	31.8282
C9orf163	0.988299	3.59211	-9.05615	2.48823e-18	2.72241e-17	30.4354
ELFN2	0.965705	2.92832	-3.85796	0.000128212	0.000317965	-0.380848
FLJ12825	0.880519	3.83479	-4.23663	2.66985e-05	7.19697e-05	1.10614
PVT1	0.835456	7.07785	-6.44477	2.57685e-10	1.22896e-09	12.2805
CYB561D2	0.824127	8.76316	-9.12665	1.4183e-18	1.64878e-17	30.9907
TLX1NB	0.793106	0.763062	-4.93792	1.05548e-06	3.3848e-06	4.20089
C1orf220	0.674036	3.7704	-4.9691	9.05472e-07	2.9547e-06	4.34857
C10orf91	0.634972	1.01792	-4.82624	1.8156e-06	5.53609e-06	3.67885
MIAT	0.632616	7.01139	-4.06597	5.49877e-05	0.00014611	0.419792
TCL6	0.6057	1.42862	-3.19866	0.00146202	0.00309017	-2.6537
HAR1B	0.588696	1.49877	-2.75874	0.00600024	0.0117478	-3.94258
SNHG3	0.559659	5.41747	-4.69284	3.42284e-06	1.01055e-05	3.06973
BCAR4	0.550943	0.675804	-3.32195	0.00095468	0.00211393	-2.25958
MIR155HG	0.525569	4.01715	-3.37186	0.000800337	0.00179353	-2.09596
C9orf106	0.488546	1.68741	-3.4194	0.000675228	0.00155052	-1.93794
SNHG9	0.480381	5.27671	-3.53325	0.000445816	0.00104964	-1.55091
TDRG1	0.478435	0.601247	-4.62672	4.66084e-06	1.35456e-05	2.77361
C9orf139	0.410885	2.0442	-3.24466	0.00124903	0.00270139	-2.50833
RPPH1	0.396907	3.94373	-2.30506	0.0215431	0.038903	-5.07749
DSCR9	0.333153	1.45212	-3.06047	0.00232023	0.00484902	-3.07838
TP53TG1	0.329961	8.18705	-2.70774	0.00698996	0.0135431	-4.08004
SNHG11	0.284154	7.33723	-3.40775	0.00070407	0.00159704	-1.97685
HPYR1	0.262285	0.370188	-3.71501	0.000224447	0.00054217	-0.907974
DGCR11	0.237811	4.91975	-2.76476	0.00589204	0.0116587	-3.92617
C12orf77	0.156773	0.217078	-2.94099	0.0034126	0.0068252	-3.43098
TTTY23	-0.00447042	0.000588868	2.50282	0.0126163	0.0234664	-4.60719
DKFZP434K028	-0.0261813	0.0151252	2.35987	0.0186377	0.0339864	-4.95094
C3orf79	-0.043032	0.0250787	3.00427	0.00278624	0.00575823	-3.24592
PWRN1	-0.0823948	0.0655699	2.28619	0.0226311	0.0404748	-5.12038
PCA3	-0.0994769	0.128607	2.49869	0.0127626	0.0235034	-4.6174
HCG18	-0.149662	9.02177	2.54015	0.0113609	0.0215625	-4.51419
MGC27382	-0.155697	0.179412	2.52592	0.0118258	0.0222182	-4.54981
FAM138B	-0.156686	0.0523777	7.61515	1.19311e-13	8.87675e-13	19.8097
MEG8	-0.175107	0.11205	5.51586	5.4004e-08	2.04995e-07	7.07469
C7orf65	-0.272082	0.519148	2.99253	0.00289384	0.00591489	-3.28054
C15orf32	-0.276516	0.152641	6.34169	4.82247e-10	2.18775e-09	11.6682
FLJ37453	-0.287525	6.15583	3.25751	0.00119489	0.00261469	-2.46737
C7orf69	-0.304954	0.417302	5.15515	3.5669e-07	1.25178e-06	5.24735
GHRLOS	-0.316248	3.21426	3.22841	0.00132073	0.00282363	-2.5599
DHRS4L1	-0.345318	3.5141	2.94503	0.003369	0.00681124	-3.41926
C1orf229	-0.350309	3.20055	2.69861	0.00718197	0.0137716	-4.10439
POLR2J4	-0.378598	7.6785	6.20426	1.0979e-09	4.64114e-09	10.8651
FAM41C	-0.384562	3.83368	4.46844	9.61268e-06	2.62935e-05	2.0806
C7orf71	-0.387436	0.213556	8.5598	1.19054e-16	1.16548e-15	26.6166
GAS5	-0.428381	10.5876	3.92581	9.76784e-05	0.000252336	-0.124061
SNHG7	-0.444583	8.74748	4.51975	7.61983e-06	2.11536e-05	2.30281
MGC16275	-0.445888	4.95694	4.89556	1.29817e-06	4.09255e-06	4.0016
FAM66E	-0.452519	0.686922	5.33501	1.41022e-07	5.04426e-07	6.14465
PSORS1C3	-0.480425	0.415114	5.06989	5.48603e-07	1.82214e-06	4.83173
SPATA13	-0.486784	8.8339	3.89361	0.000111191	0.000283309	-0.246442
BMS1P4	-0.514724	5.05225	4.62085	4.78943e-06	1.37051e-05	2.74752
KC6	-0.545003	0.524961	4.03415	6.27433e-05	0.00016437	0.294743
FAM27C	-0.549235	2.865	3.58527	0.000367399	0.000876105	-1.37004
C10orf111	-0.555239	2.35682	5.45836	7.34876e-08	2.73374e-07	6.776
FAM66D	-0.56788	2.47762	3.50286	0.000498614	0.00115928	-1.6554
MALAT1	-0.575022	11.6489	4.59534	5.38924e-06	1.51879e-05	2.63445
FAM138F	-0.586336	0.369273	7.78203	3.68091e-14	2.97674e-13	20.9665
INE1	-0.630857	4.21146	7.56812	1.65601e-13	1.14081e-12	19.4874
DLEU2L	-0.632205	2.4575	6.57083	1.1841e-10	5.79585e-10	13.0408
FAM182A	-0.640226	0.954457	6.06257	2.52469e-09	1.04354e-08	10.053
PTPRVP	-0.666229	1.25543	6.37619	3.91355e-10	1.8198e-09	11.8722
MGC15885	-0.675623	0.311755	12.0913	6.127e-30	1.13962e-28	56.918
LOH12CR2	-0.688001	4.79603	7.1089	3.7415e-12	2.2449e-11	16.4253
C20orf197	-0.700373	2.28631	6.00385	3.5486e-09	1.43487e-08	9.72131
SNHG8	-0.713441	9.09167	6.69407	5.47173e-11	2.99336e-10	13.7962
SFTA1P	-0.715576	1.93695	4.70476	3.23638e-06	9.70913e-06	3.12349
C9orf170	-0.721154	1.39243	4.8427	1.67716e-06	5.19921e-06	3.75513
NEAT1	-0.724996	12.7455	5.1233	4.19214e-07	1.41771e-06	5.09137
C10orf25	-0.788781	5.32277	7.75194	4.55694e-14	3.53163e-13	20.7565
HCG27	-0.792814	3.62345	6.58552	1.08064e-10	5.74284e-10	13.1302
SNHG4	-0.80205	3.04026	5.44912	7.71974e-08	2.81543e-07	6.72827
HCG22	-0.816248	1.29636	7.04287	5.78391e-12	3.26002e-11	15.998
SCARNA9	-0.834149	2.34509	8.00078	7.65023e-15	6.46792e-14	22.5131
C17orf77	-0.834152	0.989566	3.86561	0.000124362	0.000312586	-0.352093
RMST	-0.906607	0.800499	6.57579	1.14812e-10	5.79379e-10	13.071
DNM1P35	-0.917111	3.92753	7.36093	6.88922e-13	4.27132e-12	18.0864
FAM66C	-0.934462	4.46539	7.48193	3.00776e-13	1.99801e-12	18.9007
SNHG5	-0.961741	10.0495	7.06923	4.8627e-12	2.82645e-11	16.1681
C22orf34	-1.07535	1.62592	7.60833	1.25131e-13	8.9517e-13	19.7629
RGS5	-1.09885	11.3158	6.57517	1.15253e-10	5.79379e-10	13.0672
KIAA0087	-1.14638	1.60182	7.4718	3.22508e-13	2.0685e-12	18.8322
FAM66A	-1.17236	1.25537	10.4405	2.33009e-23	3.33382e-22	41.8912
EGOT	-1.1974	3.87741	5.52699	5.08597e-08	1.97081e-07	7.13287
DIO3OS	-1.22724	0.772293	13.5688	2.82112e-36	8.74547e-35	71.4125
MIR17HG	-1.2402	4.35683	8.84161	1.35019e-17	1.3952e-16	28.765
DKFZP434L187	-1.28423	0.635475	13.3081	3.94084e-35	1.04714e-33	68.7918
HCG11	-1.43261	8.53205	12.6887	1.86631e-32	4.33917e-31	62.6714
DKFZp779M0652	-1.45009	1.38925	11.2155	2.24321e-26	3.79307e-25	48.7759
XIST	-1.45102	12.6636	6.27396	7.24687e-10	3.20933e-09	11.2705
FAM95B1	-1.47078	3.41204	8.1805	2.0531e-15	1.90938e-14	23.8089
PART1	-1.77107	4.28602	5.72535	1.71805e-08	6.7991e-08	8.1866
HYMAI	-1.8013	1.13168	17.0492	2.019e-52	1.25178e-50	108.397
C20orf203	-1.82402	1.41376	15.3188	3.23331e-44	1.50349e-42	89.5956
EMX2OS	-2.26363	5.08235	12.6181	3.73065e-32	7.71002e-31	61.9834
MEG3	-2.61162	5.63124	15.0645	4.8799e-43	1.81532e-41	86.8954
AGAP11	-2.80876	5.20017	17.9751	6.41674e-57	5.96757e-55	118.708
MESTIT1	-3.18032	1.70877	25.2131	3.64166e-93	6.77349e-91	201.839

## Sheet: miRNA
genesymbol	logFC	AveExpr	t	P.Value	adj.P.Val	B
hsa-mir-1307	3.62529	7.61606	-20.9331	1.30503e-71	6.4686e-69	152.397
hsa-mir-210	3.11402	8.4942	-13.6396	1.36958e-36	9.25709e-35	72.2337
hsa-mir-183	3.0056	13.5065	-23.2018	4.87899e-83	3.62753e-80	178.565
hsa-mir-141	2.38996	9.4947	-16.9542	5.77173e-52	9.53619e-50	107.411
hsa-mir-190b	2.24144	3.25142	-10.7457	1.56671e-24	4.85353e-23	44.6988
hsa-mir-429	2.23245	6.17794	-14.0978	1.24058e-38	1.02486e-36	76.9049
hsa-mir-196a-1	2.16262	8.19239	-7.49654	2.71873e-13	3.85024e-12	19.1578
hsa-mir-21	2.16214	10.9725	-18.7655	8.3272e-61	2.47651e-58	127.653
hsa-mir-3677	1.98356	3.427	-12.6851	1.93122e-32	9.26362e-31	62.7509
hsa-mir-1269a	1.94613	2.32363	-5.15445	3.57937e-07	2.66126e-06	5.41425
hsa-mir-184	1.93922	3.00099	-6.55828	1.27991e-10	1.42032e-09	13.128
hsa-mir-592	1.91404	1.89723	-13.9162	8.07751e-38	6.32172e-36	75.0443
hsa-mir-200a	1.8675	7.54592	-12.2834	9.65841e-31	4.10344e-29	58.8699
hsa-mir-1301	1.83606	3.74815	-13.8644	1.37491e-37	1.02225e-35	74.5161
hsa-mir-375	1.60709	13.2969	-6.25303	8.21192e-10	8.36379e-09	11.3134
hsa-mir-503	1.58521	3.28202	-9.93811	1.7686e-21	4.61388e-20	37.7438
hsa-mir-940	1.57852	2.49238	-10.891	4.2629e-25	1.34871e-23	45.9876
hsa-mir-301a	1.5662	2.55597	-9.00196	3.82289e-18	7.68193e-17	30.1584
hsa-mir-192	1.55257	8.62402	-12.2859	9.43232e-31	4.10344e-29	58.8934
hsa-mir-200c	1.51959	5.25269	-13.3367	2.94831e-35	1.75366e-33	69.1866
hsa-mir-92b	1.42121	6.74726	-11.384	4.75317e-27	1.76699e-25	50.4417
hsa-mir-130b	1.41743	3.36051	-11.788	1.09255e-28	4.39086e-27	54.1812
hsa-mir-148b	1.37398	7.45557	-15.0419	6.18792e-43	6.57246e-41	86.7451
hsa-mir-200b	1.36018	8.86943	-9.9627	1.43551e-21	3.81179e-20	37.9501
hsa-mir-187	1.33541	3.56871	-4.65729	4.04268e-06	2.52582e-05	3.08238
hsa-mir-760	1.3337	1.7355	-9.8325	4.31654e-21	1.10667e-19	36.8616
hsa-mir-142	1.32992	5.55576	-7.89211	1.67604e-14	2.60802e-13	21.896
hsa-mir-454	1.31315	3.16013	-10.4227	2.7187e-23	7.77443e-22	41.874
hsa-mir-331	1.28775	5.17271	-10.6257	4.55496e-24	1.35464e-22	43.6422
hsa-mir-937	1.28689	1.81059	-8.035	5.96338e-15	9.53499e-14	22.9126
hsa-mir-4326	1.27855	2.41988	-7.40716	5.02444e-13	6.7933e-12	18.5548
hsa-mir-342	1.2597	8.3822	-8.50076	1.86559e-16	3.34233e-15	26.3245
hsa-mir-449a	1.24408	1.2787	-5.23494	2.3709e-07	1.78961e-06	5.81196
hsa-mir-203a	1.22615	11.6393	-5.33948	1.37751e-07	1.07808e-06	6.33681
hsa-mir-203b	1.20957	4.5548	-4.59284	5.45157e-06	3.336e-05	2.79601
hsa-mir-106b	1.20248	7.53044	-10.6359	4.15966e-24	1.26233e-22	43.7321
hsa-mir-590	1.19875	2.41138	-10.9072	3.68597e-25	1.19153e-23	46.1316
hsa-mir-3065	1.19459	4.65516	-6.58649	1.07394e-10	1.20071e-09	13.2995
hsa-mir-191	1.17218	9.89621	-9.22533	6.42122e-19	1.40417e-17	31.9194
hsa-mir-105-2	1.15004	1.37816	-4.02477	6.52181e-05	0.000342683	0.432748
hsa-mir-3613	1.13123	3.44528	-9.72578	1.05645e-20	2.57531e-19	35.9769
hsa-mir-4638	1.07387	1.34513	-10.4452	2.2337e-23	6.51276e-22	42.0684
hsa-mir-3200	1.07156	2.09448	-6.60581	9.52078e-11	1.07253e-09	13.4172
hsa-mir-16-1	1.06201	2.20765	-11.121	5.31307e-26	1.79558e-24	48.0501
hsa-mir-4746	1.05682	1.76454	-9.78194	6.60195e-21	1.63618e-19	36.4416
hsa-mir-7-2	1.05593	1.25695	-7.47458	3.16322e-13	4.43747e-12	19.0091
hsa-mir-615	1.04893	3.24364	-6.2947	6.39889e-10	6.60774e-09	11.5568
hsa-mir-628	1.04045	5.09763	-6.17938	1.27205e-09	1.25268e-08	10.8868
hsa-mir-493	1.03593	1.90533	-9.66799	1.71066e-20	4.10282e-19	35.5005
hsa-mir-15b	1.03148	7.21977	-7.44442	3.8923e-13	5.40921e-12	18.8054
hsa-mir-425	1.00171	8.23122	-6.67054	6.34545e-11	7.31449e-10	13.8138
hsa-mir-20b	0.967665	1.35505	-6.3212	5.4562e-10	5.67368e-09	11.7122
hsa-mir-93	0.955943	3.85317	-7.21163	1.88727e-12	2.50568e-11	17.2564
hsa-mir-181b-1	0.946787	8.01001	-8.23347	1.38695e-15	2.31729e-14	24.3483
hsa-mir-4677	0.912408	3.31396	-8.83588	1.41141e-17	2.72567e-16	28.8698
hsa-mir-7706	0.893385	1.36405	-9.30829	3.28464e-19	7.4004e-18	32.5813
hsa-mir-340	0.863601	3.3121	-7.57951	1.52944e-13	2.20804e-12	19.7227
hsa-mir-7-1	0.858421	4.67301	-6.2162	1.02262e-09	1.02745e-08	11.0996
hsa-mir-7705	0.844517	0.865996	-10.219	1.59845e-22	4.40167e-21	40.1212
hsa-mir-484	0.825991	6.5391	-7.36678	6.61855e-13	8.86647e-12	18.2844
hsa-mir-148a	0.798093	15.4426	-6.06633	2.46972e-09	2.35415e-08	10.2404
hsa-mir-3610	0.773169	0.947443	-9.10839	1.64026e-18	3.4353e-17	30.9935
hsa-mir-188	0.757657	1.24715	-6.97753	8.87118e-12	1.11792e-10	15.7395
hsa-mir-766	0.748106	3.32944	-6.2209	9.945e-10	1.006e-08	11.1267
hsa-mir-3170	0.747848	1.59059	-6.72597	4.47135e-11	5.2769e-10	14.1562
hsa-mir-3615	0.74466	1.78663	-5.89905	6.47052e-09	5.90286e-08	9.30316
hsa-mir-3614	0.73919	1.67378	-5.06048	5.75061e-07	4.15104e-06	4.95696
hsa-mir-181a-1	0.730892	7.60942	-7.20081	2.02912e-12	2.67018e-11	17.1853
hsa-mir-98	0.728452	5.77496	-7.96606	9.83558e-15	1.55591e-13	22.4203
hsa-mir-99b	0.723042	15.4681	-7.05145	5.46543e-12	7.00612e-11	16.214
hsa-mir-1266	0.713657	4.00737	-5.33531	1.40797e-07	1.09615e-06	6.31567
hsa-mir-4501	0.712712	0.662899	-6.17042	1.34125e-09	1.31213e-08	10.8352
hsa-mir-155	0.712408	0.738395	-7.52289	2.26597e-13	3.2399e-12	19.3367
hsa-mir-3928	0.697939	1.57605	-6.45076	2.48367e-10	2.69578e-09	12.4804
hsa-mir-769	0.681895	1.59645	-6.9701	9.31145e-12	1.16354e-10	15.692
hsa-mir-1269b	0.671253	0.730437	-2.87648	0.00418098	0.0151549	-3.43768
hsa-mir-3607	0.65224	6.24542	-3.42005	0.000673641	0.00290349	-1.75919
hsa-mir-33b	0.651045	0.85916	-7.06181	5.10522e-12	6.60127e-11	16.2808
hsa-mir-939	0.650392	1.20703	-7.41046	4.91228e-13	6.76348e-12	18.577
hsa-mir-301b	0.647322	0.714709	-7.11919	3.49425e-12	4.55786e-11	16.6524
hsa-mir-107	0.640406	5.67858	-7.72721	5.42674e-14	8.06956e-13	20.7409
hsa-mir-19a	0.633936	4.13315	-4.20272	3.08815e-05	0.000167594	1.1417
hsa-mir-616	0.632498	1.73922	-5.42681	8.69188e-08	6.98639e-07	6.78238
hsa-mir-1224	0.6318	0.865306	-4.44062	1.08926e-05	6.35188e-05	2.13429
hsa-mir-16-2	0.609127	3.02286	-4.82515	1.82502e-06	1.18507e-05	3.84553
hsa-mir-3074	0.607379	3.74048	-4.50143	8.28059e-06	4.90567e-05	2.39618
hsa-mir-5586	0.60248	1.95431	-5.57596	3.9019e-08	3.24141e-07	7.55835
hsa-mir-196a-2	0.592569	0.592677	-5.82426	9.88139e-09	8.79858e-08	8.89156
hsa-mir-744	0.589173	4.38506	-4.06474	5.52694e-05	0.000292475	0.589466
hsa-mir-147b	0.582173	0.632912	-6.84539	2.08706e-11	2.56484e-10	14.9017
hsa-let-7a-1	0.575023	5.25065	-5.69382	2.04578e-08	1.74832e-07	8.18475
hsa-mir-629	0.573525	6.86183	-5.63163	2.88021e-08	2.4197e-07	7.8528
hsa-mir-7156	0.5732	0.731205	-4.9926	8.06204e-07	5.62829e-06	4.63144
hsa-mir-708	0.568483	6.23811	-4.87811	1.41302e-06	9.42226e-06	4.09145
hsa-mir-324	0.567116	4.5316	-3.85944	0.000127456	0.000638139	-0.200069
hsa-mir-1251	0.563292	0.727742	-3.54085	0.00043345	0.00194139	-1.34842
hsa-mir-1254-2	0.559411	0.827652	-6.80774	2.65682e-11	3.18604e-10	14.6655
hsa-mir-4444-1	0.538127	0.928989	-6.71182	4.89049e-11	5.72611e-10	14.0686
hsa-mir-651	0.537654	1.59298	-5.59635	3.49223e-08	2.91739e-07	7.66591
hsa-mir-185	0.525178	5.4275	-6.25894	7.92719e-10	8.12947e-09	11.3479
hsa-mir-1226	0.524205	1.27679	-4.77857	2.28114e-06	1.4621e-05	3.63127
hsa-mir-671	0.523111	2.264	-5.76439	1.38237e-08	1.22356e-07	8.56537
hsa-mir-4664	0.515127	0.534391	-6.16076	1.41997e-09	1.38006e-08	10.7796
hsa-mir-1976	0.512033	3.43494	-5.82866	9.6393e-09	8.63472e-08	8.91566
hsa-mir-3687-1	0.511065	0.726666	-5.00751	7.48779e-07	5.25205e-06	4.70261
hsa-mir-1287	0.506444	3.44841	-3.39921	0.000725941	0.00310194	-1.82868
hsa-mir-32	0.497171	0.847982	-6.6811	5.93715e-11	6.8973e-10	13.8789
hsa-mir-1229	0.487137	0.855424	-4.78055	2.2597e-06	1.45462e-05	3.64034
hsa-mir-18a	0.486532	1.10501	-3.85172	0.00013143	0.000653635	-0.229004
hsa-mir-4742	0.485966	0.959846	-5.84239	8.92096e-09	8.0887e-08	8.99093
hsa-mir-3940	0.480868	0.624696	-5.83299	9.40696e-09	8.47767e-08	8.93937
hsa-mir-449b	0.478749	0.467248	-3.98128	7.79661e-05	0.000403957	0.263873
hsa-mir-345	0.477804	0.820568	-6.01478	3.33103e-09	3.13496e-08	9.94916
hsa-mir-421	0.466505	1.27013	-4.86502	1.50558e-06	9.99464e-06	4.03045
hsa-mir-33a	0.46109	1.37893	-4.16395	3.64283e-05	0.000195555	0.984807
hsa-let-7f-1	0.457229	1.90394	-4.84564	1.6535e-06	1.08867e-05	3.94037
hsa-mir-5694	0.451901	0.67493	-4.5327	7.18311e-06	4.28967e-05	2.53211
hsa-mir-27a	0.445552	9.85386	-4.52152	7.55853e-06	4.49581e-05	2.4834
hsa-mir-151a	0.439597	10.9944	-5.01591	7.18198e-07	5.06142e-06	4.74278
hsa-mir-194-2	0.436393	7.19249	-4.68637	3.52831e-06	2.22314e-05	3.21282
hsa-mir-3690-2	0.433732	0.65414	-5.30348	1.66242e-07	1.28084e-06	6.15503
hsa-mir-330	0.430722	2.02573	-4.45178	1.03604e-05	6.0653e-05	2.18212
hsa-mir-193a	0.430269	4.14171	-3.817	0.000150796	0.000737612	-0.358456
hsa-mir-103a-2	0.420353	1.30898	-4.36399	1.5318e-05	8.66079e-05	1.80902
hsa-mir-1306	0.419366	3.28448	-3.11746	0.00192175	0.00736504	-2.72804
hsa-mir-3651	0.417589	0.947658	-4.32319	1.83292e-05	0.000101488	1.638
hsa-mir-320b-1	0.408575	2.53263	-3.38258	0.000770364	0.00327295	-1.88383
hsa-mir-4784	0.404839	0.497863	-5.71218	1.84813e-08	1.60712e-07	8.28339
hsa-mir-589	0.397499	5.72226	-4.12331	4.32564e-05	0.000229722	0.821775
hsa-mir-3156-2	0.388996	0.373322	-3.3693	0.000807637	0.00338298	-1.92769
hsa-mir-3662	0.373023	0.412302	-5.41602	9.20386e-08	7.35814e-07	6.72698
hsa-mir-17	0.37027	7.20375	-3.12035	0.00190329	0.00731317	-2.71918
hsa-mir-582	0.36626	7.0406	-2.53071	0.0116675	0.0373912	-4.35904
hsa-mir-4791	0.365892	0.473644	-6.0166	3.29615e-09	3.12189e-08	9.95941
hsa-mir-365b	0.365377	1.12049	-4.01661	6.7449e-05	0.000353157	0.400921
hsa-mir-3648-1	0.364247	0.708688	-3.71205	0.000227021	0.00106829	-0.743011
hsa-mir-579	0.362017	0.614182	-4.39262	1.34941e-05	7.7176e-05	1.92991
hsa-mir-182	0.348815	0.333223	-6.40687	3.24724e-10	3.42457e-09	12.2187
hsa-mir-3678	0.347119	0.634276	-4.8455	1.6546e-06	1.08867e-05	3.93973
hsa-mir-4766	0.344708	0.439966	-4.94985	9.95434e-07	6.78996e-06	4.42845
hsa-mir-639	0.343418	0.522066	-5.56935	4.04448e-08	3.34119e-07	7.52356
hsa-mir-3917	0.342958	1.10509	-4.00658	7.02885e-05	0.000366734	0.361906
hsa-mir-4443	0.341125	0.407783	-5.69241	2.06175e-08	1.7519e-07	8.17721
hsa-let-7f-2	0.332109	0.691109	-4.83338	1.75414e-06	1.14404e-05	3.88359
hsa-mir-3619	0.328512	0.389504	-5.37182	1.16241e-07	9.14551e-07	6.50105
hsa-mir-3127	0.327104	0.327412	-5.46457	7.10879e-08	5.80812e-07	6.97706
hsa-mir-1292	0.325962	0.51569	-5.30513	1.64824e-07	1.27653e-06	6.16331
hsa-mir-5003	0.32263	0.467462	-4.9682	9.09481e-07	6.23225e-06	4.51538
hsa-mir-6783	0.319951	0.382101	-4.83594	1.73266e-06	1.13501e-05	3.89543
hsa-mir-576	0.318812	3.77913	-2.556	0.0108621	0.0351128	-4.29553
hsa-mir-4652	0.317089	0.310509	-3.65109	0.000286654	0.00132377	-0.961715
hsa-mir-548au	0.315948	0.372244	-5.70238	1.9512e-08	1.67713e-07	8.23071
hsa-mir-3934	0.315457	0.940113	-3.84646	0.000134202	0.000665194	-0.248665
hsa-mir-219a-1	0.312975	0.670805	-4.43736	1.10528e-05	6.4201e-05	2.12035
hsa-mir-5698	0.307031	0.941131	-2.82707	0.0048725	0.0173335	-3.57634
hsa-mir-6777	0.304601	0.53509	-4.38874	1.37283e-05	7.82144e-05	1.9135
hsa-mir-550a-1	0.303622	1.94601	-2.47993	0.013446	0.0421819	-4.48467
hsa-mir-2114	0.303117	0.400545	-3.94941	8.87739e-05	0.000453632	0.141193
hsa-mir-5695	0.301693	0.38185	-5.12755	4.10283e-07	3.03528e-06	5.28255
hsa-mir-34b	0.297011	0.766173	-3.05428	0.00236781	0.00902803	-2.91943
hsa-mir-4665	0.290829	0.352718	-4.33549	1.73668e-05	9.70842e-05	1.68939
hsa-mir-3176	0.284549	0.28488	-5.05597	5.88169e-07	4.22515e-06	4.93524
hsa-mir-942	0.282125	0.537486	-3.88271	0.000116152	0.000587479	-0.112519
hsa-mir-556	0.280227	0.37175	-4.41472	1.22299e-05	7.07623e-05	2.02376
hsa-mir-1284	0.277032	0.35561	-5.28424	1.83734e-07	1.40831e-06	6.05832
hsa-mir-877	0.275524	0.381546	-4.34532	1.66319e-05	9.36806e-05	1.73059
hsa-mir-767	0.275479	0.253559	-2.77048	0.00579094	0.0202477	-3.7323
hsa-mir-25	0.275233	0.355262	-4.8145	1.9208e-06	1.24184e-05	3.79639
hsa-mir-4466	0.26509	0.296814	-5.10021	4.71035e-07	3.43347e-06	5.14936
hsa-mir-4675	0.258976	0.266247	-3.76911	0.000181966	0.000872849	-0.53521
hsa-mir-5691	0.25642	0.394969	-3.75305	0.000193707	0.000920801	-0.593979
hsa-mir-1910	0.249144	0.339025	-3.86778	0.000123291	0.000619371	-0.168753
hsa-mir-6501	0.248637	0.378698	-3.84178	0.000136721	0.000673191	-0.266182
hsa-mir-4714	0.247609	0.334507	-3.55238	0.000415318	0.00187145	-1.30852
hsa-mir-3161	0.246556	0.284854	-3.13957	0.00178488	0.00689381	-2.66016
hsa-mir-636	0.242109	0.401175	-3.65833	0.000278866	0.00129182	-0.935905
hsa-mir-6815	0.24125	0.329114	-4.54772	6.70682e-06	4.03767e-05	2.59772
hsa-mir-4649	0.238239	0.323671	-4.71677	3.05814e-06	1.94336e-05	3.34997
hsa-mir-3664	0.232363	0.258216	-4.21519	2.92745e-05	0.000159455	1.19249
hsa-mir-4660	0.232063	0.531214	-3.46422	0.0005742	0.00251015	-1.6106
hsa-mir-632	0.230907	0.337878	-4.53586	7.08037e-06	4.24537e-05	2.54589
hsa-mir-6844	0.225658	0.224987	-4.33415	1.74693e-05	9.72918e-05	1.68378
hsa-mir-5690	0.225468	0.245472	-4.14625	3.92658e-05	0.000209277	0.913607
hsa-mir-4484	0.223675	0.279082	-4.40626	1.26999e-05	7.31969e-05	1.98778
hsa-mir-3156-1	0.223423	0.212899	-2.49074	0.0130483	0.041161	-4.45812
hsa-mir-1248	0.221619	0.40532	-2.9596	0.0032162	0.012077	-3.19915
hsa-mir-96	0.220467	0.202594	-5.07311	5.39785e-07	3.91541e-06	5.01799
hsa-mir-320d-1	0.219046	1.02467	-2.41718	0.015973	0.049074	-4.63647
hsa-mir-658	0.216747	0.315987	-4.57775	5.84378e-06	3.56135e-05	2.72952
hsa-mir-6737	0.216605	0.223296	-4.6459	4.26312e-06	2.64136e-05	3.03151
hsa-mir-15a	0.213348	0.283372	-4.48174	9.05256e-06	5.34173e-05	2.31101
hsa-mir-548d-1	0.212032	0.263576	-3.61245	0.000331767	0.00150868	-1.09856
hsa-mir-4763	0.21117	0.309833	-3.62701	0.000314038	0.00143685	-1.04716
hsa-mir-3174	0.209315	0.214764	-5.02329	6.92316e-07	4.90226e-06	4.77814
hsa-mir-4745	0.209194	0.262536	-3.87296	0.000120769	0.000608756	-0.149267
hsa-mir-7974	0.209049	0.209631	-4.57073	6.03549e-06	3.66317e-05	2.69863
hsa-mir-4473	0.206075	0.561027	-2.60153	0.00953659	0.0315131	-4.17967
hsa-mir-5684	0.203763	0.346741	-3.94175	9.15751e-05	0.000464751	0.11185
hsa-mir-4640	0.20153	0.19531	-4.91152	1.20096e-06	8.15444e-06	4.24784
hsa-mir-4658	0.199084	0.229965	-3.7529	0.00019382	0.000920801	-0.594528
hsa-mir-4442	0.197104	0.298425	-4.28742	2.14277e-05	0.000118011	1.48928
hsa-mir-4786	0.188656	0.527354	-2.81147	0.00511151	0.0180542	-3.61964
hsa-mir-4674	0.185882	0.264917	-3.41276	0.000691523	0.00296338	-1.78355
hsa-mir-548o	0.185352	0.450286	-3.35938	0.000836589	0.0034652	-1.96036
hsa-mir-765	0.184529	0.269125	-3.7761	0.000177065	0.000852089	-0.50954
hsa-mir-3680-2	0.181437	0.316803	-3.28403	0.00108991	0.00438027	-2.20536
hsa-mir-581	0.179466	0.64197	-2.70504	0.00704614	0.0237588	-3.90883
hsa-mir-6806	0.178695	0.987729	-2.55397	0.0109249	0.0352395	-4.30066
hsa-mir-6808	0.175296	0.476633	-2.85958	0.00440685	0.0158668	-3.48539
hsa-mir-4523	0.171978	0.206196	-3.69056	0.000246565	0.00114935	-0.820495
hsa-mir-5001	0.165483	0.302356	-3.13706	0.00179997	0.00693409	-2.6679
hsa-mir-548f-2	0.165306	0.172024	-2.53303	0.0115912	0.0372272	-4.35323
hsa-mir-643	0.164806	0.29573	-3.53411	0.000444403	0.00198447	-1.37172
hsa-mir-3150a	0.164732	0.171007	-4.14757	3.90461e-05	0.000208854	0.918933
hsa-mir-137	0.163841	0.23022	-2.43257	0.0153173	0.0474516	-4.59959
hsa-mir-6877	0.16363	0.366128	-3.06323	0.0022993	0.00878934	-2.89254
hsa-mir-5681b	0.163528	0.156437	-3.35067	0.000862793	0.00354412	-1.98896
hsa-mir-6781	0.163391	0.273195	-3.34778	0.000871638	0.0035706	-1.99842
hsa-mir-6125	0.161291	0.239714	-3.97257	8.07892e-05	0.000415687	0.23025
hsa-mir-1276	0.160868	0.182105	-3.97732	7.92394e-05	0.000409128	0.248559
hsa-mir-106a	0.160281	0.174646	-3.64682	0.000291339	0.00134124	-0.9769
hsa-mir-502	0.157882	0.546048	-2.41177	0.0162095	0.0496979	-4.64939
hsa-mir-4728	0.155568	0.160027	-3.14417	0.00175755	0.00680593	-2.64598
hsa-mir-6728	0.151242	0.166086	-3.24213	0.00125996	0.00500952	-2.33933
hsa-mir-6875	0.148589	0.30787	-2.79944	0.00530314	0.0186866	-3.65289
hsa-mir-663a	0.14755	0.178362	-2.90557	0.00381685	0.0139451	-3.35495
hsa-mir-5706	0.147177	0.389827	-2.71797	0.00678043	0.0230721	-3.8743
hsa-mir-1275	0.146887	0.353103	-2.49295	0.0129685	0.0410301	-4.4527
hsa-mir-4434	0.146099	0.164264	-3.85689	0.000128756	0.000642486	-0.209634
hsa-mir-652	0.145212	0.373138	-2.51764	0.0121038	0.038623	-4.3916
hsa-mir-1538	0.138204	0.292756	-2.91412	0.00371546	0.0136755	-3.33048
hsa-mir-3655	0.136435	0.17285	-3.60918	0.000335874	0.0015227	-1.11007
hsa-mir-219b	0.129545	0.237724	-2.8567	0.00444635	0.0159704	-3.49347
hsa-mir-4741	0.129484	0.192168	-2.95778	0.00323492	0.0121167	-3.20444
hsa-mir-3911	0.126005	0.136735	-3.1923	0.00149397	0.00586156	-2.49644
hsa-mir-4522	0.125178	0.209835	-3.0186	0.00265993	0.0101159	-3.02584
hsa-mir-3913-1	0.123683	0.244623	-2.9814	0.00299935	0.0112912	-3.1355
hsa-mir-5008	0.122427	0.13849	-3.2003	0.00145386	0.00573446	-2.47136
hsa-mir-3194	0.122327	0.141852	-3.63156	0.00030868	0.00141669	-1.03105
hsa-mir-5091	0.121851	0.291063	-2.58102	0.0101148	0.0332614	-4.23212
hsa-mir-6516	0.120603	0.254546	-2.63748	0.00859424	0.028783	-4.08678
hsa-mir-1181	0.11786	0.144659	-3.3666	0.000815442	0.00340608	-1.93661
hsa-mir-573	0.114361	0.106778	-3.31999	0.00096127	0.00388426	-2.08912
hsa-mir-4802	0.114345	0.113311	-3.79731	0.000162946	0.000791832	-0.431381
hsa-mir-1288	0.112999	0.192108	-2.85273	0.00450143	0.0161292	-3.50463
hsa-mir-3187	0.112255	0.140544	-3.26162	0.00117803	0.00469634	-2.27723
hsa-mir-1268b	0.110336	0.119391	-3.37332	0.000796177	0.00335387	-1.91442
hsa-mir-2276	0.108008	0.114187	-3.45076	0.000602935	0.00261389	-1.65605
hsa-mir-5703	0.106962	0.222534	-2.61412	0.00919653	0.0305251	-4.14728
hsa-mir-4758	0.10669	0.107215	-3.37564	0.00078964	0.00334528	-1.90677
hsa-mir-6739	0.106118	0.122276	-3.3328	0.000918923	0.00374367	-2.04738
hsa-mir-8072	0.105567	0.127689	-3.33004	0.000927903	0.00376992	-2.05639
hsa-mir-3191	0.104785	0.185946	-2.77547	0.00570412	0.0200521	-3.71868
hsa-mir-3652	0.104007	0.167818	-3.00731	0.00275902	0.0104393	-3.05926
hsa-mir-548t	0.102587	0.192401	-2.57365	0.0103301	0.033686	-4.25087
hsa-mir-504	0.101613	0.13039	-2.72396	0.00666018	0.0227671	-3.85821
hsa-mir-4736	0.10136	0.0913707	-3.37474	0.00079218	0.00334651	-1.90975
hsa-mir-3654	0.100005	0.134043	-2.70718	0.00700162	0.0237047	-3.90314
hsa-mir-4654	0.0977838	0.107791	-2.94151	0.00340688	0.0126968	-3.25161
hsa-mir-6779	0.096718	0.11026	-2.92529	0.00358668	0.0132672	-3.29841
hsa-mir-3927	0.0916872	0.0836463	-2.42213	0.0157593	0.0486183	-4.62463
hsa-mir-3064	0.0871285	0.148862	-2.60954	0.00931908	0.030863	-4.15909
hsa-mir-4680	0.0868566	0.101783	-2.75946	0.00598713	0.0207526	-3.76233
hsa-mir-1180	0.0861561	0.0845283	-3.38392	0.000766691	0.00326667	-1.8794
hsa-mir-4446	0.0855984	0.0743229	-3.29389	0.00105314	0.00424397	-2.17361
hsa-mir-6822	0.0846164	0.0734703	-3.46785	0.000566666	0.00249511	-1.5983
hsa-mir-4738	0.0843458	0.0890893	-3.1485	0.00173219	0.00672524	-2.63262
hsa-mir-4739	0.0813304	0.077196	-2.77233	0.00575862	0.0201959	-3.72725
hsa-mir-7845	0.0812504	0.132545	-2.46062	0.014183	0.0443069	-4.53179
hsa-mir-4762	0.081081	0.0958992	-2.87574	0.00419058	0.0151549	-3.43976
hsa-mir-5582	0.0802146	0.100406	-2.62779	0.00883955	0.0294059	-4.11193
hsa-mir-4700	0.0780199	0.0860631	-2.82943	0.00483735	0.0172497	-3.56979
hsa-mir-4666a	0.0775403	0.0838192	-3.00772	0.00275533	0.0104393	-3.05804
hsa-mir-6812	0.0758606	0.100497	-2.6674	0.00787457	0.0264323	-4.00852
hsa-mir-4479	0.0717222	0.0738957	-2.91052	0.00375784	0.0137973	-3.34079
hsa-mir-3611	0.0703361	0.0895133	-2.51907	0.0120553	0.0385511	-4.38804
hsa-mir-4657	0.0698997	0.0996935	-2.41759	0.0159554	0.049074	-4.63551
hsa-mir-597	0.0689097	0.0746283	-2.75591	0.00605147	0.0209268	-3.77196
hsa-mir-4519	0.0685974	0.0759825	-2.75008	0.00615871	0.0212483	-3.78778
hsa-mir-548ay	0.0677843	0.0823751	-2.5804	0.0101328	0.0332614	-4.2337
hsa-mir-3115	0.0661393	0.0627496	-2.70658	0.00701417	0.0237047	-3.90474
hsa-mir-4435-1	0.0652255	0.0700477	-2.51135	0.012319	0.0392256	-4.40722
hsa-mir-4726	0.0625757	0.0603822	-2.70699	0.00700552	0.0237047	-3.90364
hsa-mir-6839	0.0599598	0.0619898	-2.76993	0.00580062	0.0202477	-3.73381
hsa-mir-3183	0.05923	0.0582983	-2.93887	0.00343562	0.0127719	-3.25925
hsa-mir-6878	0.0573376	0.0632707	-2.7374	0.00639776	0.021971	-3.82206
hsa-mir-1537	0.0531108	0.0495739	-2.49028	0.0130652	0.041161	-4.45927
hsa-mir-7110	0.0483041	0.0419412	-2.68329	0.00751466	0.0252812	-3.96659
hsa-mir-3116-1	0.0440158	0.0382178	-2.44908	0.0146404	0.0455445	-4.55978
hsa-mir-6719	-0.00192676	0.000253803	2.4581	0.0142817	0.0445217	-4.5379
hsa-mir-6500	-0.00345916	0.000455659	2.54187	0.0113058	0.0363891	-4.3311
hsa-mir-4693	-0.00430563	0.000567161	2.55603	0.0108612	0.0351128	-4.29546
hsa-mir-936	-0.00430563	0.000567161	2.55603	0.0108612	0.0351128	-4.29546
hsa-mir-892c	-0.00808833	0.00148275	2.82485	0.004906	0.017411	-3.58254
hsa-mir-3688-2	-0.00810705	0.00169184	2.82091	0.00496575	0.0175811	-3.59349
hsa-mir-3612	-0.00870461	0.00181243	2.76272	0.00592841	0.0206453	-3.75345
hsa-mir-3606	-0.00974366	0.00128349	2.57722	0.0102252	0.0334172	-4.24178
hsa-mir-1277	-0.0102042	0.00134416	2.57768	0.0102118	0.0334172	-4.24061
hsa-mir-7855	-0.018569	0.00314152	4.46346	9.83045e-06	5.77782e-05	2.23226
hsa-mir-4529	-0.019943	0.00685863	3.1524	0.00170966	0.00665516	-2.62058
hsa-mir-198	-0.0200963	0.00982694	2.48882	0.0131182	0.0412406	-4.46285
hsa-mir-4803	-0.0208786	0.00485302	3.76169	0.0001873	0.000895549	-0.562371
hsa-mir-4458	-0.021647	0.0041059	3.19377	0.00148651	0.00584772	-2.49183
hsa-mir-7849	-0.0224843	0.00823803	3.44946	0.000605798	0.00261867	-1.66046
hsa-mir-4757	-0.0235578	0.0111158	2.72306	0.00667823	0.0227765	-3.86065
hsa-mir-378g	-0.0254069	0.0166074	2.43108	0.0153796	0.0475456	-4.60317
hsa-mir-1193	-0.0280962	0.0146191	2.90635	0.00380747	0.0139451	-3.35271
hsa-mir-551b	-0.0324353	0.0120471	3.74508	0.000199803	0.000946202	-0.623092
hsa-mir-4670	-0.0329489	0.0124917	3.35837	0.000839594	0.00346799	-1.96369
-	-0.0441707	0.0115421	4.88714	1.3524e-06	9.09965e-06	4.13361
hsa-mir-3195	-0.0497008	0.0311404	2.92185	0.00362585	0.0133788	-3.30829
hsa-mir-892a	-0.0512841	0.0471326	2.50024	0.0127076	0.0402905	-4.43472
hsa-mir-3656	-0.0580941	0.035419	3.32379	0.000948508	0.00384314	-2.07674
hsa-mir-329-1	-0.058573	0.0588986	2.87889	0.00414962	0.0150867	-3.43085
hsa-mir-378i	-0.0599374	0.0243111	5.04699	6.15172e-07	4.39788e-06	4.89198
hsa-mir-5188	-0.061171	0.0337723	3.37083	0.000803268	0.00337418	-1.92265
hsa-mir-888	-0.0619458	0.0139925	6.15704	1.4514e-09	1.40145e-08	10.7583
hsa-mir-4524a	-0.0800229	0.0348133	4.61437	4.93532e-06	3.03257e-05	2.89126
hsa-mir-7976	-0.0815776	0.113079	2.55832	0.0107909	0.0351117	-4.28969
hsa-mir-4770	-0.0823607	0.0524587	4.27182	2.29307e-05	0.00012536	1.42476
hsa-mir-4433b	-0.0826116	0.0436582	3.84487	0.000135054	0.000667195	-0.254629
hsa-mir-3152	-0.0849381	0.102631	2.84199	0.00465359	0.0166344	-3.53474
hsa-mir-4703	-0.0850217	0.0336164	5.25638	2.12259e-07	1.61861e-06	5.91885
hsa-mir-6748	-0.0886118	0.072152	3.46761	0.000567147	0.00249511	-1.59909
hsa-mir-216b	-0.0917087	0.0699725	3.46353	0.00057563	0.00251015	-1.61291
hsa-mir-1294	-0.0955106	0.172233	2.62901	0.0088085	0.0293682	-4.10878
hsa-mir-4701	-0.100501	0.0952906	3.46431	0.000574009	0.00251015	-1.61029
hsa-mir-487b	-0.102303	0.108308	3.4987	0.00050627	0.00224724	-1.49329
hsa-mir-6809	-0.107895	0.0509053	5.4321	8.45099e-08	6.82969e-07	6.80959
hsa-mir-4286	-0.109642	0.211971	2.63406	0.00868003	0.029005	-4.09565
hsa-mir-494	-0.11334	0.109534	3.69173	0.000245458	0.00114778	-0.816273
hsa-mir-7641-1	-0.121917	0.238324	2.44434	0.0148318	0.0460436	-4.57123
hsa-mir-4678	-0.122272	0.0408343	5.50698	5.66416e-08	4.65338e-07	7.19712
hsa-mir-4759	-0.123477	0.0665503	5.4537	7.53337e-08	6.12138e-07	6.92088
hsa-mir-4740	-0.124152	0.077059	4.8897	1.33565e-06	9.02776e-06	4.1456
hsa-mir-6883	-0.12663	0.0648564	5.98069	4.05506e-09	3.74527e-08	9.75774
hsa-mir-584	-0.127184	0.148005	2.95471	0.0032668	0.0122054	-3.21337
hsa-mir-4683	-0.13025	0.239109	2.58094	0.0101169	0.0332614	-4.23231
hsa-mir-133a-1	-0.133091	0.065631	5.39491	1.02916e-07	8.17243e-07	6.61886
hsa-mir-6730	-0.134875	0.107339	4.38136	1.41849e-05	8.05074e-05	1.8823
hsa-mir-433	-0.137952	0.0995256	4.97561	8.76835e-07	6.06443e-06	4.55057
hsa-mir-489	-0.140896	0.150756	3.41381	0.00068892	0.00296076	-1.78004
hsa-mir-520h	-0.142014	0.134914	3.00106	0.00281527	0.0106251	-3.07769
hsa-mir-511	-0.148029	0.288969	2.76005	0.00597649	0.0207526	-3.76073
hsa-mir-346	-0.158645	0.212762	3.68326	0.000253561	0.00117827	-0.846737
hsa-mir-4732	-0.160335	0.0337005	7.69301	6.90758e-14	1.01699e-12	20.5037
hsa-mir-202	-0.162146	0.0694299	3.58042	0.000374115	0.00169091	-1.21091
hsa-mir-548q	-0.163199	0.269953	3.70294	0.00023512	0.00110291	-0.775907
hsa-mir-488	-0.174302	0.161182	4.32282	1.83593e-05	0.000101488	1.63644
hsa-mir-6717	-0.178384	0.0657251	7.65132	9.25988e-14	1.34995e-12	20.2157
hsa-mir-6766	-0.183018	0.117658	6.00064	3.6146e-09	3.38044e-08	9.86964
hsa-mir-6715b	-0.194022	0.0764125	6.9567	1.01604e-11	1.25904e-10	15.6066
hsa-mir-770	-0.194713	0.09485	6.44394	2.58957e-10	2.77028e-09	12.4396
hsa-mir-4510	-0.201921	0.227164	4.77142	2.3602e-06	1.50627e-05	3.59856
hsa-mir-6874	-0.206826	0.346577	4.19008	3.25942e-05	0.000176246	1.09042
hsa-mir-6514	-0.217029	0.300464	4.62958	4.59913e-06	2.83772e-05	2.95883
hsa-mir-3129	-0.217797	0.472114	3.81381	0.000152702	0.000744487	-0.370281
hsa-mir-151b	-0.21914	1.66651	2.50354	0.0125912	0.0400065	-4.42657
hsa-mir-361	-0.223287	7.47633	3.77781	0.000175882	0.000849147	-0.503239
hsa-mir-541	-0.229758	0.537119	3.18984	0.00150648	0.00589511	-2.50413
hsa-mir-6746	-0.251337	0.137132	7.40714	5.02531e-13	6.7933e-12	18.5546
hsa-let-7a-2	-0.255628	15.0037	2.89538	0.00394101	0.0143634	-3.38403
hsa-mir-4780	-0.258867	0.166705	5.10139	4.68238e-07	3.4299e-06	5.1551
hsa-mir-665	-0.265697	0.318858	5.39416	1.03323e-07	8.17243e-07	6.61504
hsa-mir-3622a	-0.267297	0.244612	4.64955	4.19109e-06	2.60759e-05	3.04784
hsa-mir-320a	-0.272069	8.96353	2.74809	0.00619562	0.0213261	-3.79316
hsa-mir-518b	-0.275442	0.286217	3.62584	0.000315428	0.00143878	-1.05129
hsa-mir-7704	-0.277704	0.691041	3.34234	0.000888543	0.00362984	-2.01623
hsa-mir-561	-0.282195	0.240467	5.6436	2.69736e-08	2.27896e-07	7.91643
hsa-mir-517b	-0.285022	0.342588	3.49344	0.000516129	0.00228418	-1.51127
hsa-mir-1249	-0.288744	1.89863	3.1674	0.00162539	0.00634371	-2.57407
hsa-mir-22	-0.289261	16.125	3.96798	8.23146e-05	0.000422075	0.212571
hsa-mir-4491	-0.294	0.429027	4.70857	3.17865e-06	2.01134e-05	3.3129
hsa-mir-101-2	-0.301163	13.2111	3.36043	0.000833485	0.00346199	-1.95691
hsa-mir-4788	-0.302357	0.22478	5.94968	4.84575e-09	4.44792e-08	9.58441
hsa-mir-154	-0.305319	1.13227	3.46183	0.000579196	0.00251832	-1.61866
hsa-let-7i	-0.313613	8.77176	4.97221	8.91675e-07	6.13852e-06	4.53441
hsa-mir-376a-1	-0.321626	0.962723	3.36105	0.000831649	0.00346199	-1.95487
hsa-mir-30d	-0.327216	12.5844	3.35354	0.000854062	0.00351798	-1.97953
hsa-mir-4521	-0.332268	0.605055	5.04146	6.32416e-07	4.49954e-06	4.86533
hsa-mir-211	-0.337818	0.150699	7.89147	1.68373e-14	2.60802e-13	21.8915
hsa-mir-199a-2	-0.339551	10.2541	2.72685	0.00660293	0.0226234	-3.85045
hsa-mir-374a	-0.348639	4.81586	4.16691	3.59728e-05	0.00019381	0.996753
hsa-mir-34c	-0.350127	2.8039	2.46097	0.0141693	0.0443069	-4.53093
hsa-mir-6499	-0.353983	0.197307	6.66115	6.7311e-11	7.69934e-10	13.7562
hsa-mir-3926-1	-0.357252	0.80147	4.33968	1.70499e-05	9.56724e-05	1.70694
hsa-let-7e	-0.362067	4.15852	3.51052	0.000484785	0.00215831	-1.45286
hsa-mir-133b	-0.363814	0.377539	4.98324	8.44387e-07	5.8673e-06	4.58688
hsa-mir-664b	-0.376457	2.36402	3.84013	0.000137615	0.00067536	-0.272326
hsa-mir-323a	-0.381761	2.08433	2.93165	0.00351516	0.013035	-3.28008
hsa-mir-520a	-0.382187	0.297361	5.73605	1.61878e-08	1.41596e-07	8.41204
hsa-mir-23a	-0.382467	2.06625	2.87511	0.00419895	0.0151549	-3.44157
hsa-mir-370	-0.388177	2.77418	3.27934	0.00110786	0.0044404	-2.22046
hsa-mir-377	-0.389221	0.964436	4.40026	1.30431e-05	7.48844e-05	1.96234
hsa-mir-6511b-1	-0.39502	2.14742	3.73237	0.000209885	0.00099079	-0.66933
hsa-mir-214	-0.408556	2.69668	3.20078	0.00145151	0.00573446	-2.46987
hsa-mir-30c-1	-0.415164	9.447	3.78194	0.000173063	0.000838258	-0.488044
hsa-let-7b	-0.427277	5.70958	3.54261	0.000430634	0.0019346	-1.34234
hsa-mir-376b	-0.42872	0.658222	5.70494	1.92377e-08	1.66317e-07	8.24445
hsa-mir-30b	-0.430917	8.72466	3.27053	0.00114224	0.00456588	-2.24871
hsa-mir-374b	-0.432351	5.66142	4.67807	3.66822e-06	2.30154e-05	3.17554
hsa-mir-543	-0.436905	0.654441	5.74483	1.54159e-08	1.35641e-07	8.45949
hsa-mir-376a-2	-0.438837	0.547959	6.20395	1.09977e-09	1.09024e-08	11.0287
hsa-mir-125a	-0.461183	10.0043	4.55276	6.55379e-06	3.96158e-05	2.6198
hsa-mir-656	-0.467869	0.652709	6.82231	2.42025e-11	2.94993e-10	14.7568
hsa-mir-1271	-0.474133	2.23126	4.27326	2.27874e-05	0.000125037	1.43073
hsa-mir-1296	-0.476255	2.94051	4.05289	5.80569e-05	0.000306137	0.542862
hsa-mir-382	-0.477305	4.42631	3.99342	7.41877e-05	0.000385724	0.310842
hsa-mir-221	-0.496459	6.48595	3.94732	8.95316e-05	0.000455936	0.133165
hsa-mir-585	-0.502976	0.29159	9.56333	4.07387e-20	9.61562e-19	34.6431
hsa-mir-4532	-0.504766	0.425498	8.42832	3.22841e-16	5.58215e-15	25.7841
hsa-mir-140	-0.549012	5.31083	5.20031	2.83251e-07	2.11655e-06	5.64016
hsa-mir-30e	-0.551294	12.7548	8.19794	1.80427e-15	2.98106e-14	24.0893
hsa-mir-676	-0.561741	0.738565	7.74659	4.73165e-14	7.10704e-13	20.8756
hsa-mir-6716	-0.563354	0.844418	8.08488	4.14378e-15	6.77121e-14	23.2708
hsa-mir-190a	-0.576653	2.12787	6.205	1.09294e-09	1.09024e-08	11.0347
hsa-mir-129-2	-0.577185	0.30134	8.84623	1.30173e-17	2.54693e-16	28.9496
hsa-mir-411	-0.58582	1.00438	6.5043	1.78734e-10	1.96872e-09	12.8017
hsa-mir-206	-0.586788	0.369631	5.23875	2.32487e-07	1.76382e-06	5.83091
hsa-mir-134	-0.637827	8.64213	5.22323	2.51823e-07	1.89122e-06	5.75373
hsa-mir-1262	-0.657464	0.704102	9.12549	1.43089e-18	3.03962e-17	31.1283
hsa-mir-378d-2	-0.667707	0.415586	11.9365	2.67815e-29	1.10622e-27	55.5751
hsa-mir-6715a	-0.674519	0.37105	9.08767	1.93509e-18	3.99649e-17	30.8304
hsa-mir-329-2	-0.681532	0.699406	9.28773	3.87988e-19	8.61101e-18	32.4168
hsa-mir-150	-0.704692	9.22695	3.23675	0.00128347	0.00508938	-2.35639
hsa-mir-485	-0.732729	2.27566	6.44634	2.55177e-10	2.74963e-09	12.454
hsa-mir-217	-0.737836	3.70025	4.88379	1.37458e-06	9.20718e-06	4.11798
hsa-mir-101-1	-0.747705	2.99116	6.48462	2.01764e-10	2.20605e-09	12.6834
hsa-mir-655	-0.767977	1.59051	7.84904	2.28222e-14	3.49862e-13	21.5924
hsa-mir-6507	-0.791656	0.237292	16.2828	9.41215e-49	1.39959e-46	100.058
hsa-mir-10a	-0.793011	14.5307	5.10315	4.64098e-07	3.4164e-06	5.16366
hsa-mir-1295a	-0.813535	0.987673	8.45689	2.60158e-16	4.55124e-15	25.9968
hsa-mir-410	-0.822991	2.8156	6.42125	2.97469e-10	3.15955e-09	12.3043
hsa-mir-215	-0.825963	2.60224	6.81466	2.54175e-11	3.07283e-10	14.7088
hsa-mir-326	-0.827461	3.80985	5.98736	3.90218e-09	3.62659e-08	9.79514
hsa-mir-29a	-0.860919	12.0945	8.5935	9.19817e-17	1.6886e-15	27.0214
hsa-mir-3199-1	-0.932419	0.908441	13.257	6.57666e-35	3.76134e-33	68.3902
hsa-mir-944	-0.939937	1.07414	8.53026	1.49064e-16	2.70315e-15	26.5456
hsa-mir-758	-0.958276	3.11269	7.80582	3.10684e-14	4.71415e-13	21.2891
hsa-mir-654	-0.97582	4.23526	7.03478	6.09864e-12	7.75101e-11	16.1066
hsa-mir-223	-0.97603	6.46539	6.3331	5.07848e-10	5.3181e-09	11.7822
hsa-mir-30a	-1.02504	13.602	6.08976	2.1542e-09	2.06664e-08	10.3736
hsa-mir-299	-1.03583	1.8029	9.51846	5.89809e-20	1.37039e-18	34.2775
hsa-mir-431	-1.03685	3.202	8.04745	5.4465e-15	8.80321e-14	23.0018
hsa-mir-376c	-1.06386	2.12779	9.03633	2.91117e-18	5.93001e-17	30.4273
hsa-mir-127	-1.06487	9.04682	8.39563	4.12993e-16	7.05886e-15	25.5414
hsa-mir-30c-2	-1.08225	5.5425	6.62259	8.57266e-11	9.73095e-10	13.5197
hsa-mir-126	-1.08311	7.78747	8.97385	4.77475e-18	9.46674e-17	29.939
hsa-mir-483	-1.10015	1.37921	9.19513	8.18787e-19	1.76454e-17	31.6794
hsa-mir-891a	-1.10175	1.1724	8.70362	3.94354e-17	7.42285e-16	27.8564
hsa-mir-218-1	-1.14904	5.19096	11.1875	2.89418e-26	1.02468e-24	48.6519
hsa-mir-365a	-1.16205	6.71795	10.0997	4.45942e-22	1.20566e-20	39.1063
hsa-mir-1468	-1.16614	2.80018	8.76048	2.53897e-17	4.84031e-16	28.2906
hsa-mir-296	-1.17229	2.25079	8.47092	2.33931e-16	4.14113e-15	26.1015
hsa-mir-130a	-1.20476	6.08077	8.64082	6.3985e-17	1.18932e-15	27.3792
hsa-mir-143	-1.2458	15.2736	11.6853	2.87294e-28	1.12423e-26	53.2227
hsa-mir-1-2	-1.2774	2.23614	9.46669	9.02583e-20	2.06483e-18	33.8572
hsa-mir-497	-1.33233	4.83589	11.074	8.14819e-26	2.69252e-24	47.6265
hsa-mir-379	-1.38448	9.31125	10.4106	3.02229e-23	8.47951e-22	41.7692
hsa-mir-378c	-1.39686	2.38098	13.1775	1.4598e-34	8.03969e-33	67.5987
hsa-mir-199b	-1.41919	7.86254	11.1378	4.56026e-26	1.577e-24	48.2014
hsa-mir-1258	-1.43327	1.11031	13.3561	2.42478e-35	1.50235e-33	69.3806
hsa-mir-381	-1.51774	4.61674	12.9477	1.44358e-33	7.4021e-32	65.3246
hsa-mir-99a	-1.51789	2.06107	13.8493	1.60517e-37	1.13661e-35	74.3624
hsa-mir-495	-1.52636	2.80874	12.5879	5.00756e-32	2.32695e-30	61.8056
hsa-mir-195	-1.5567	5.34447	14.2449	2.70116e-39	2.36272e-37	78.4189
hsa-let-7c	-1.59613	4.91918	9.80437	5.46842e-21	1.37823e-19	36.6278
hsa-mir-145	-1.59994	5.05888	16.2654	1.13957e-48	1.54049e-46	99.8682
hsa-mir-224	-1.73799	4.25085	6.77238	3.32976e-11	3.96108e-10	14.4446
hsa-mir-378a	-1.74804	7.0594	12.7967	6.43823e-33	3.19122e-31	63.8409
hsa-mir-383	-1.74913	0.615474	17.2603	1.92291e-53	3.57421e-51	110.793
hsa-mir-337	-1.87025	5.37266	12.4114	2.79638e-31	1.26007e-29	60.0994
hsa-mir-125b-1	-1.9085	9.75571	15.9519	3.48033e-47	4.3127e-45	96.4698
hsa-mir-125b-2	-1.97123	4.08551	15.338	2.62491e-44	3.00249e-42	89.8851
hsa-mir-10b	-2.03346	16.2421	18.6249	4.11342e-60	1.01944e-57	126.065
hsa-mir-335	-2.11475	3.70799	13.0335	6.14969e-34	3.26593e-32	66.1714
hsa-mir-144	-2.35854	5.16268	13.4657	8.00828e-36	5.17753e-34	70.4804
hsa-mir-1247	-2.38834	4.36061	11.2461	1.69285e-26	6.13967e-25	49.1832
hsa-mir-452	-2.39472	4.89435	11.431	3.07797e-27	1.17358e-25	50.8723
hsa-mir-205	-2.39767	10.6683	8.2431	1.2913e-15	2.182e-14	24.4187
hsa-mir-451a	-2.75543	7.03797	14.3905	5.92601e-40	5.50748e-38	79.9256
hsa-mir-5683	-2.95751	2.6231	14.7258	1.75905e-41	1.74381e-39	83.4194
hsa-mir-204	-3.03469	1.94371	19.7067	1.78117e-65	6.62149e-63	138.347
hsa-mir-139	-3.20824	5.36144	24.5791	5.564e-90	8.27366e-87	194.463
hsa-mir-486-1	-3.37401	5.64028	17.9081	1.35819e-56	2.88518e-54	118.008
